# Supplementary material for: Gold-catalyzed diastereoselective synthesis of 2,6-trans-disubstituted tetrahydropyran derivatives: application for the synthesis of the C1–C13 fragment of bistramide A and B
Source: Royal Society of Chemistry journal article supplement (doi:10.1039/c5ra17646h), 2015-01-01
Supplement: c5ra17646h1.pdf [file c5ra17646h1.pdf]

*Supporting Information for*

**Gold-Catalyzed Diastereoselective Synthesis of 2,6-trans-Disubstituted Tetrahydropyran Derivatives: Application for the Synthesis of C1-C13 Fragment of Bistramide A and B**

Birakishore Padhi, D. Srinivas Reddy and Debendra K. Mohapatra\*

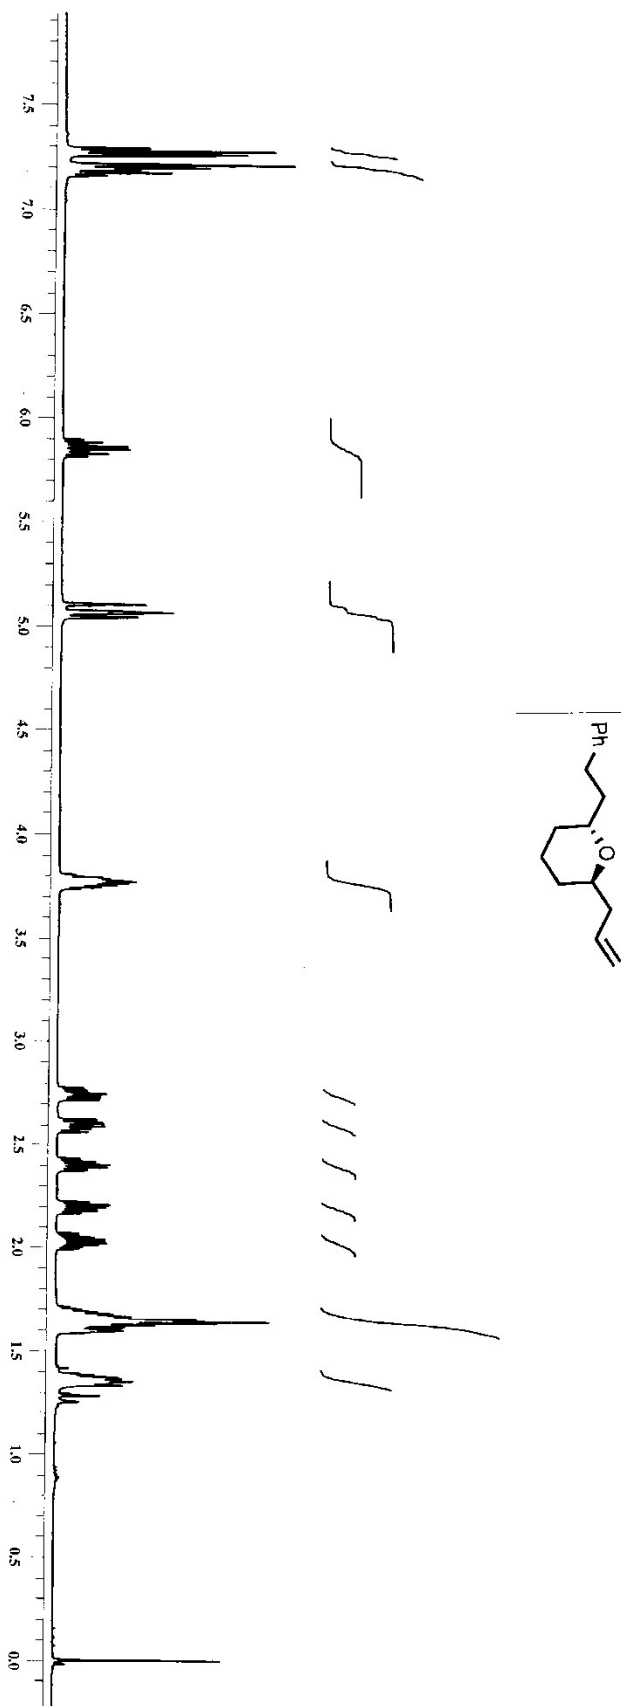 $^1\text{H}$  NMR of 2 (300 MHz,  $\text{CDCl}_3$ )

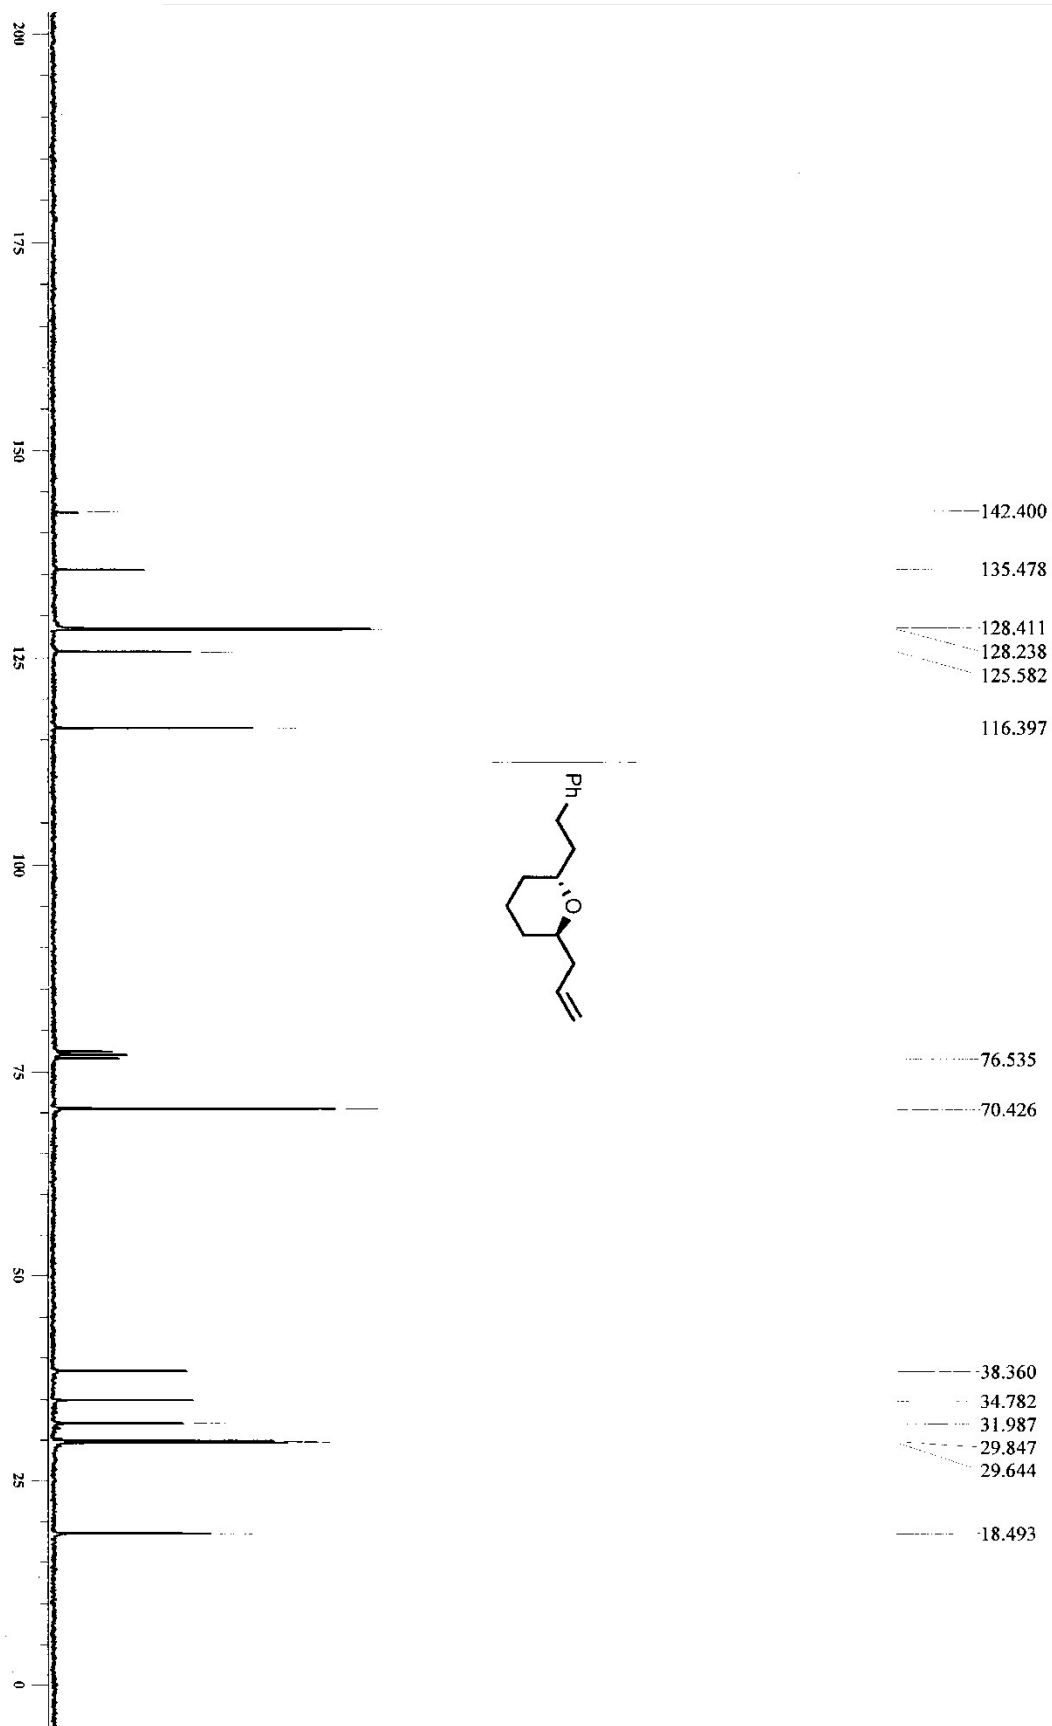 $^{13}\text{C}$  NMR of 2 (75 MHz,  $\text{CDCl}_3$ )

Data File D:\DATA\DKM2014\30102014000000.D  
 Sample Name: DKM-DSR-PH 230

```

=====
Acq. Operator   : V.RAJESH                      Seq. Line :    1
Acq. Instrument : Instrument 1                  Location  : Vial 31
Injection Date  : 10/30/2014 11:33:43 AM      Inj       :    1
                                           Inj Volume: 20 µl

Acq. Method     : D:\METHODS\LCM.m
Last changed    : 10/30/2014 11:31:48 AM by V.RAJESH
Analysis Method : D:\METHODS\LCM.m
Last changed    : 11/10/2014 11:06:17 AM by V.RAJESH
Method Info     : COLUMN:ATLANTIS C18,4.6 X 150MM 5U
                  MOBILE PHASE:80% ACN IN WATER(0.1% F.A)
                  DECTION:210NM
                  FLOWRATE:1ML/MIN
=====
  
```

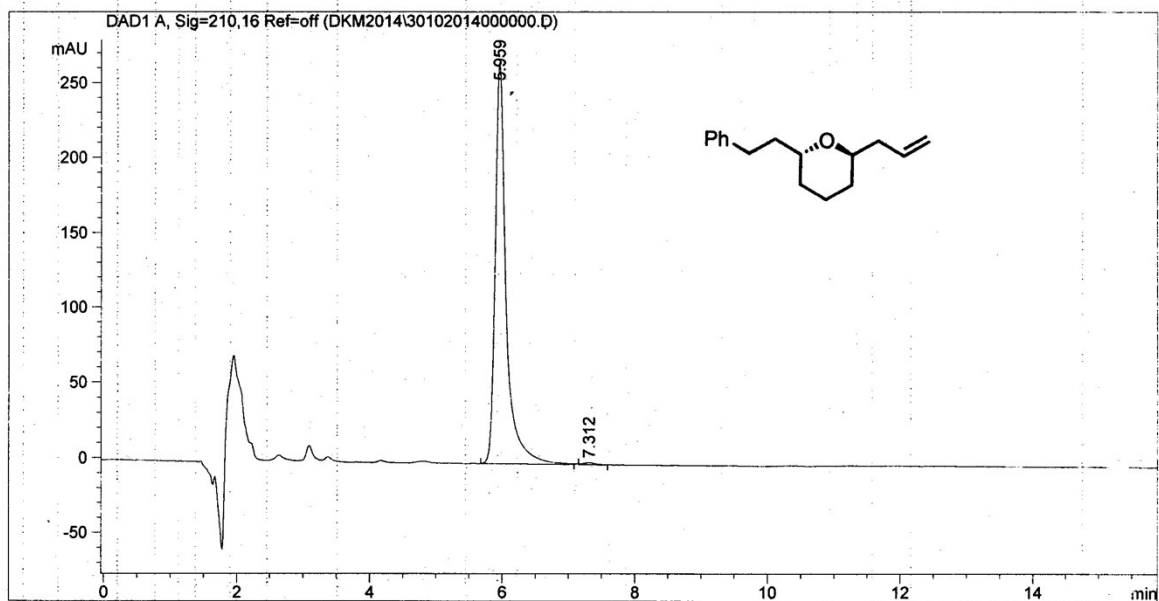

=====  
 Area Percent Report  
 =====

```

Sorted By      :      Signal
Multiplier     :      1.0000
Dilution       :      1.0000
Use Multiplier & Dilution Factor with ISTDs
  
```

Signal 1: DAD1 A, Sig=210,16 Ref=off

| Peak # | RetTime [min] | Type | Width [min] | Area [mAU*s] | Height [mAU] | Area %  |
|--------|---------------|------|-------------|--------------|--------------|---------|
| 1      | 5.959         | BB   | 0.1699      | 3063.78369   | 266.95361    | 99.4472 |
| 2      | 7.312         | BB   | 0.1906      | 17.03193     | 1.33744      | 0.5528  |

Totals :                    3080.81563   268.29105

=====  
 \*\*\* End of Report \*\*\*

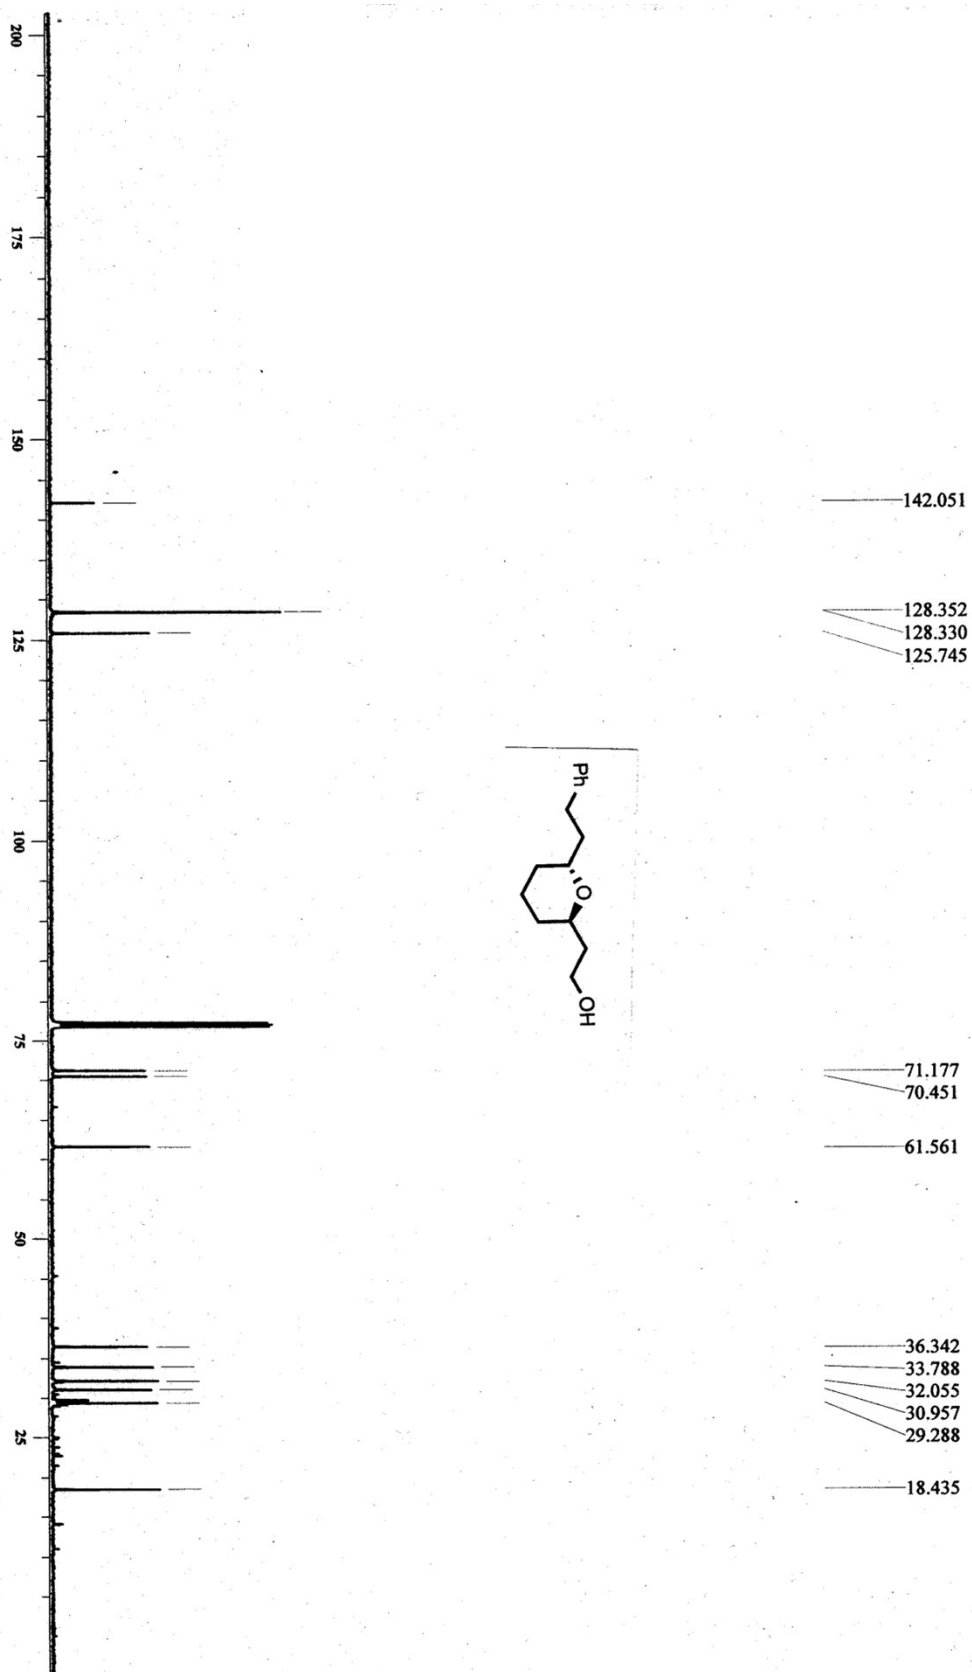 $^1\text{H}$  NMR of 4 (300 MHz,  $\text{CDCl}_3$ )

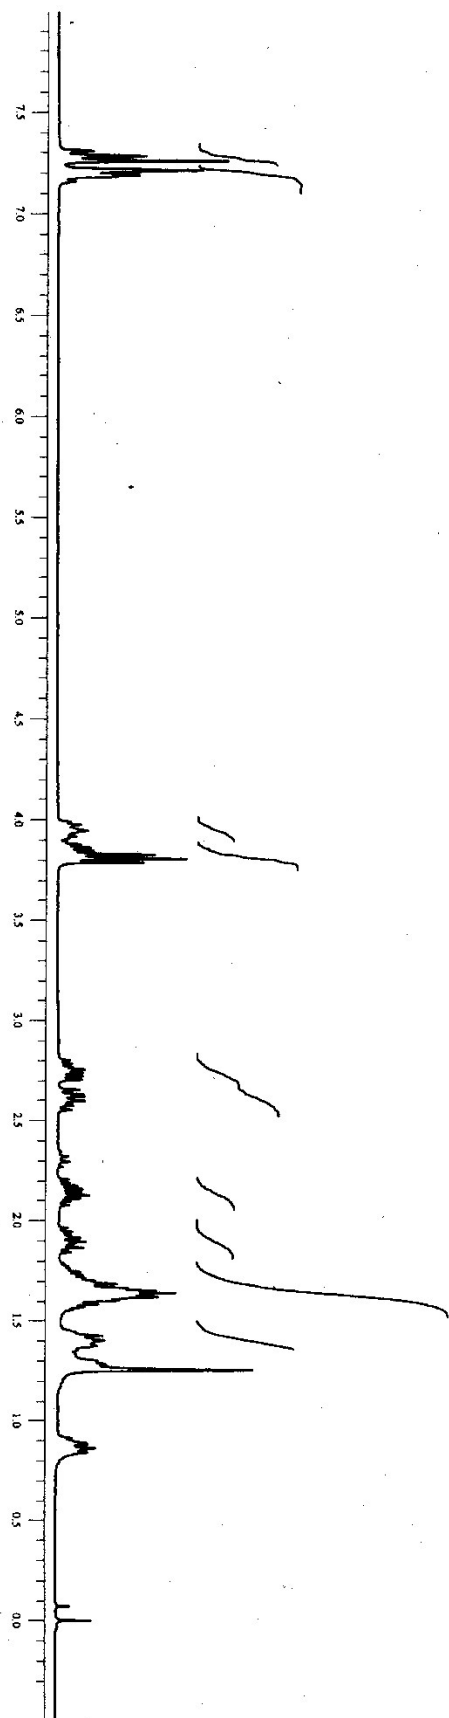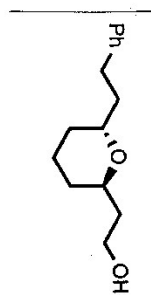

$^{13}\text{C}$  NMR of 4 (75 MHz,  $\text{CDCl}_3$ )

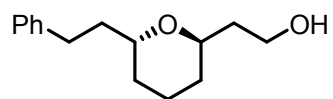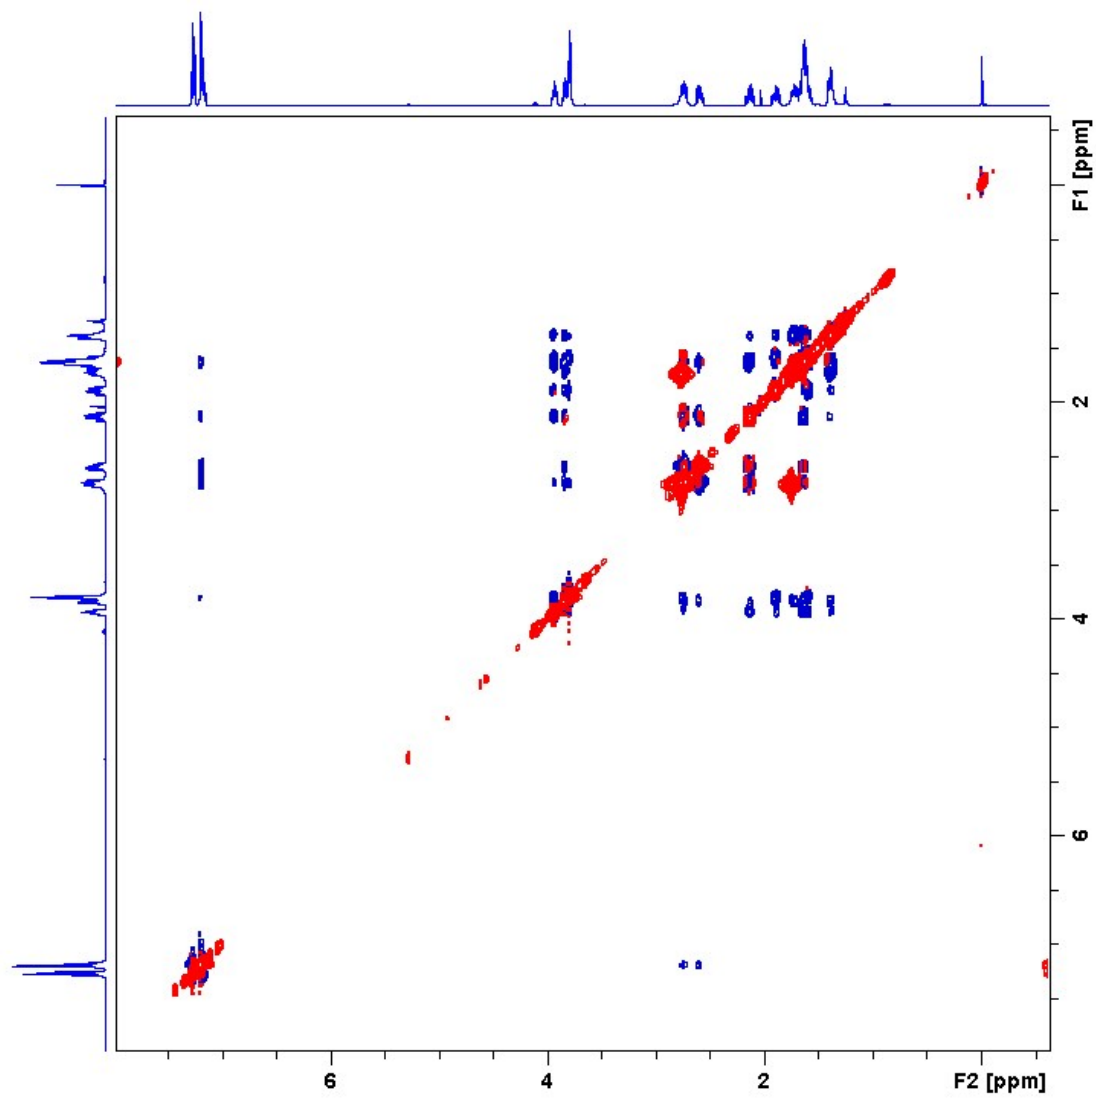

2D <sup>1</sup>H NOE of 4 (500 MHz, CDCl<sub>3</sub>)

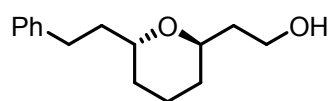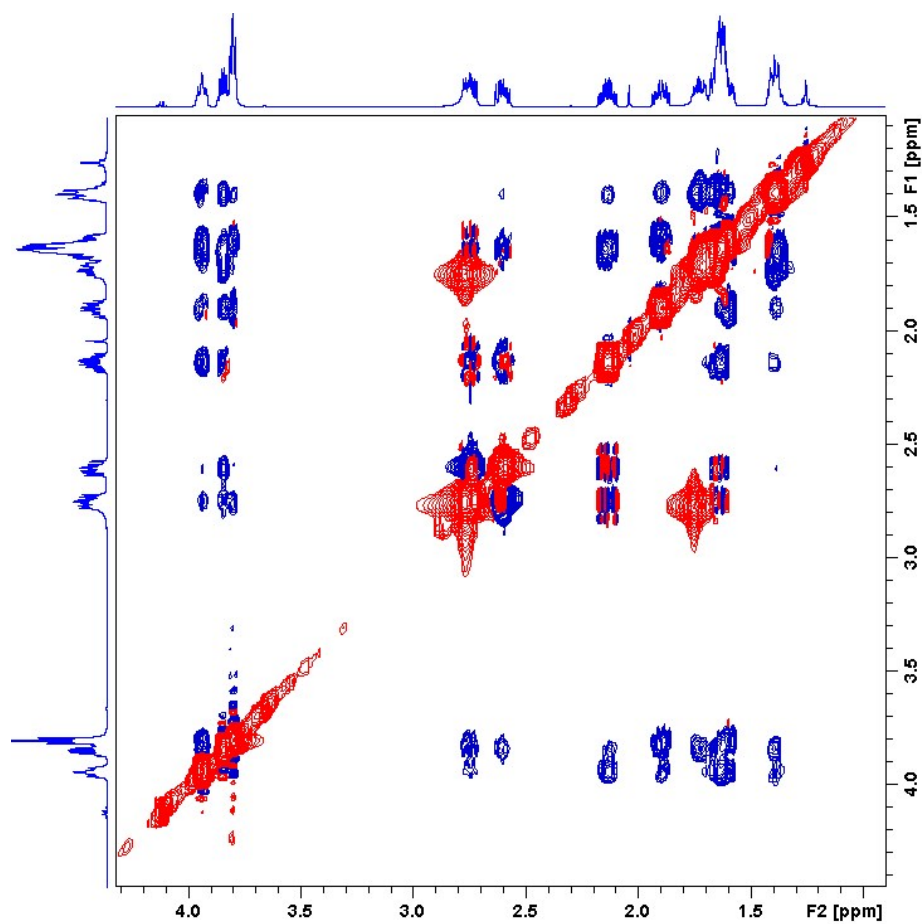

Expanded 2D <sup>1</sup>H NOE of 4 (500 MHz, CDCl<sub>3</sub>)



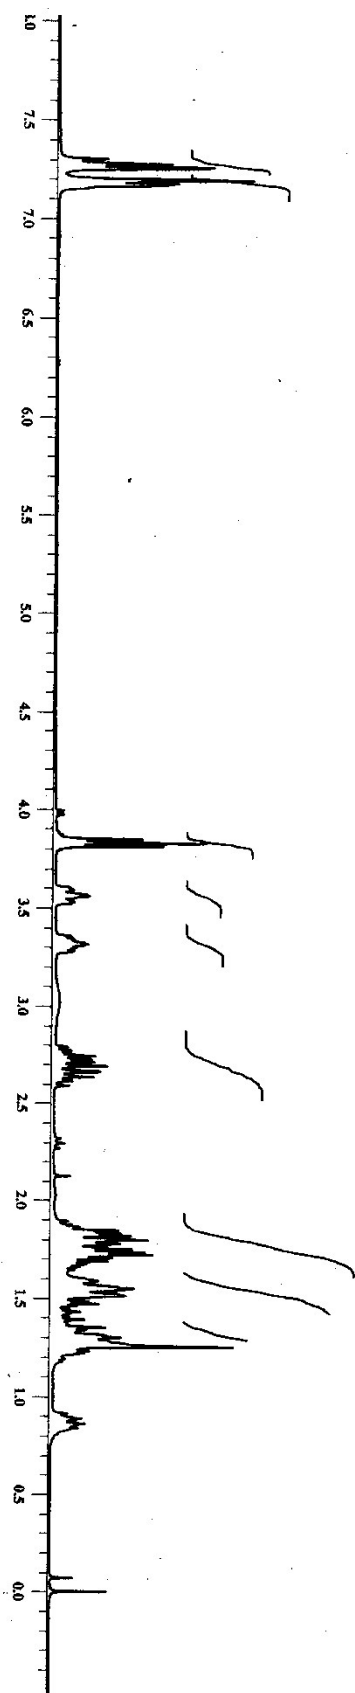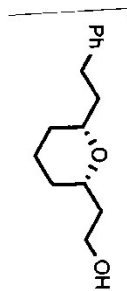 $^1\text{H}$  NMR of 5 (300 MHz,  $\text{CDCl}_3$ )

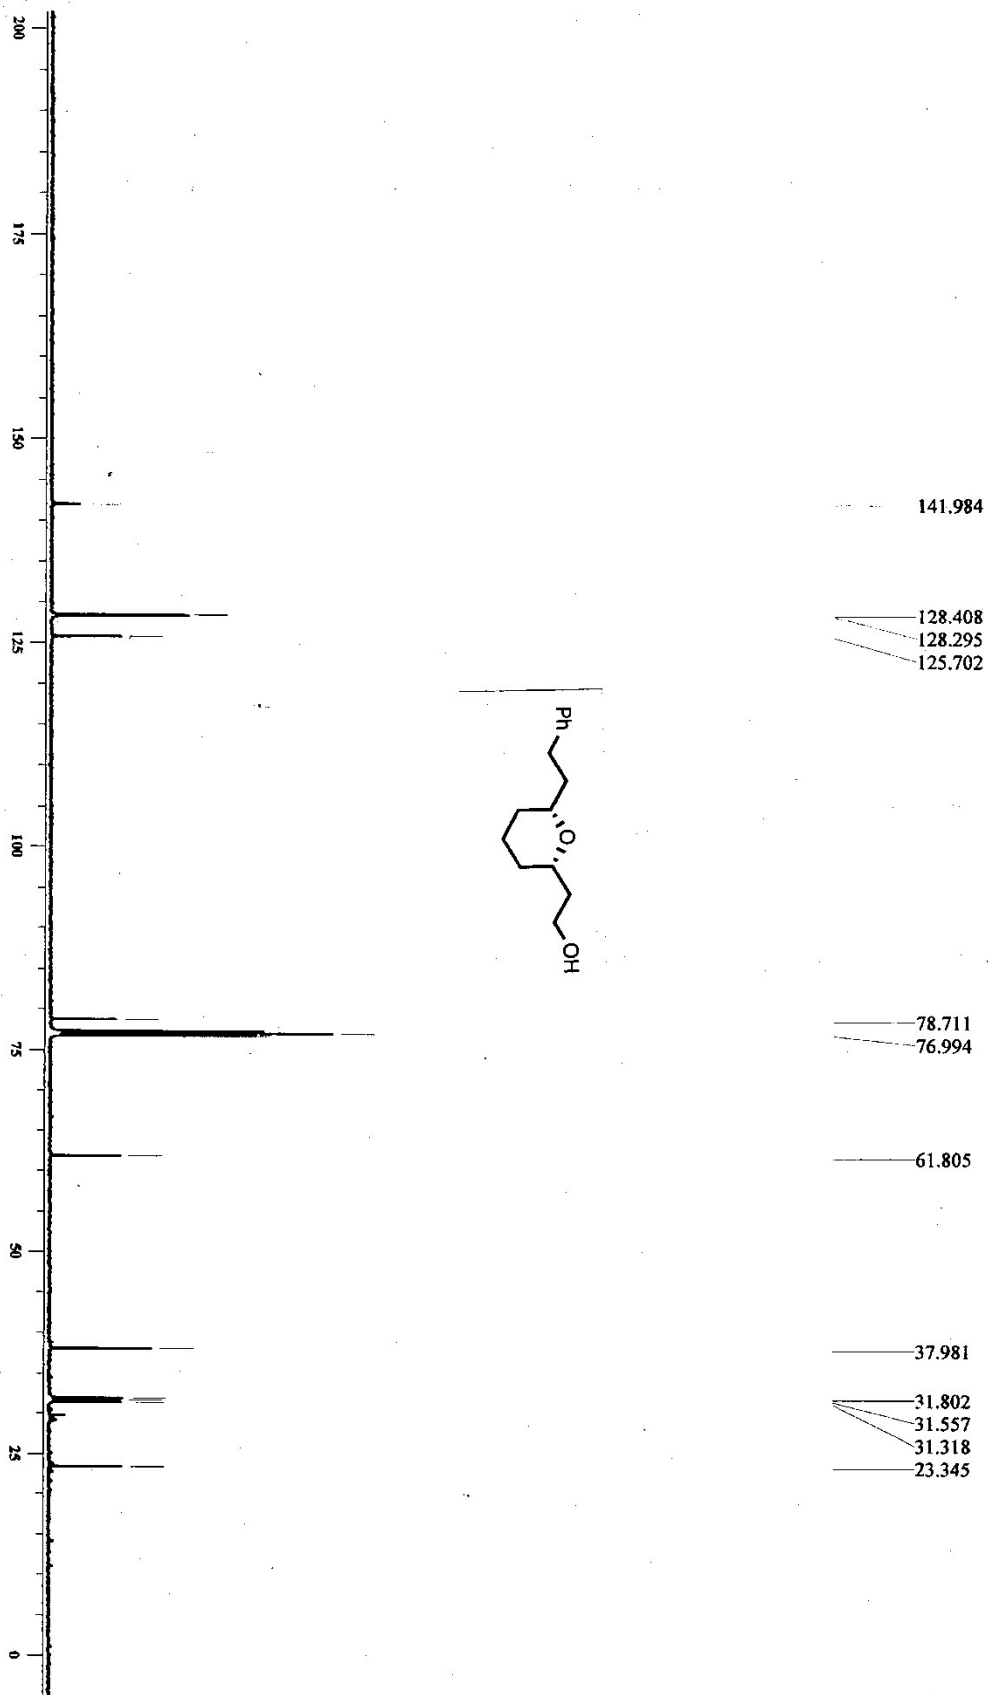

$^{13}\text{C}$  NMR of 5 (75 MHz,  $\text{CDCl}_3$ )

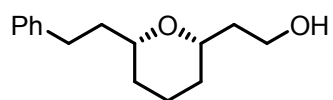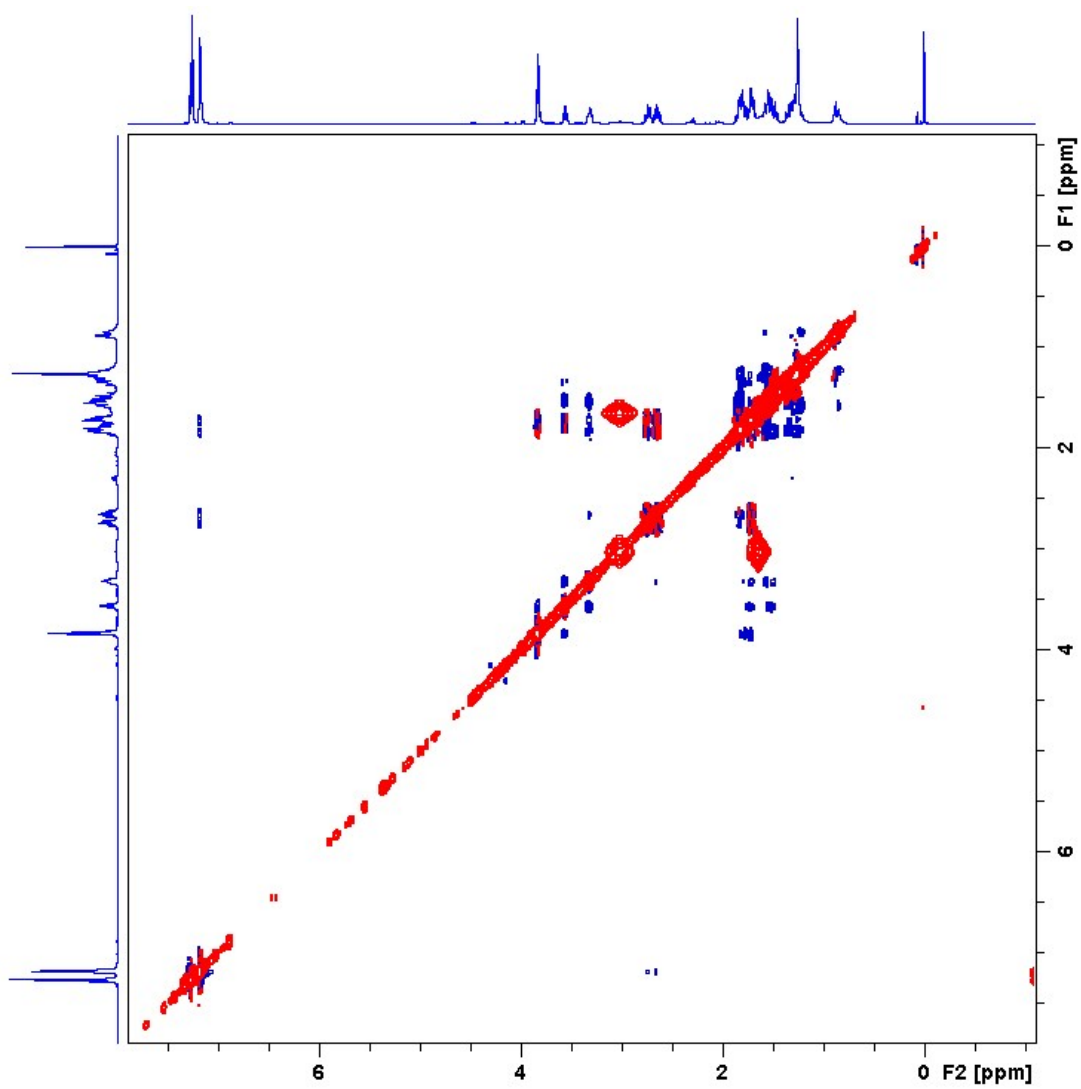

2D <sup>1</sup>H NOE of 5 (500 MHz, CDCl<sub>3</sub>)

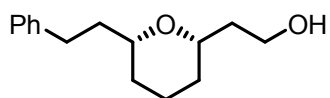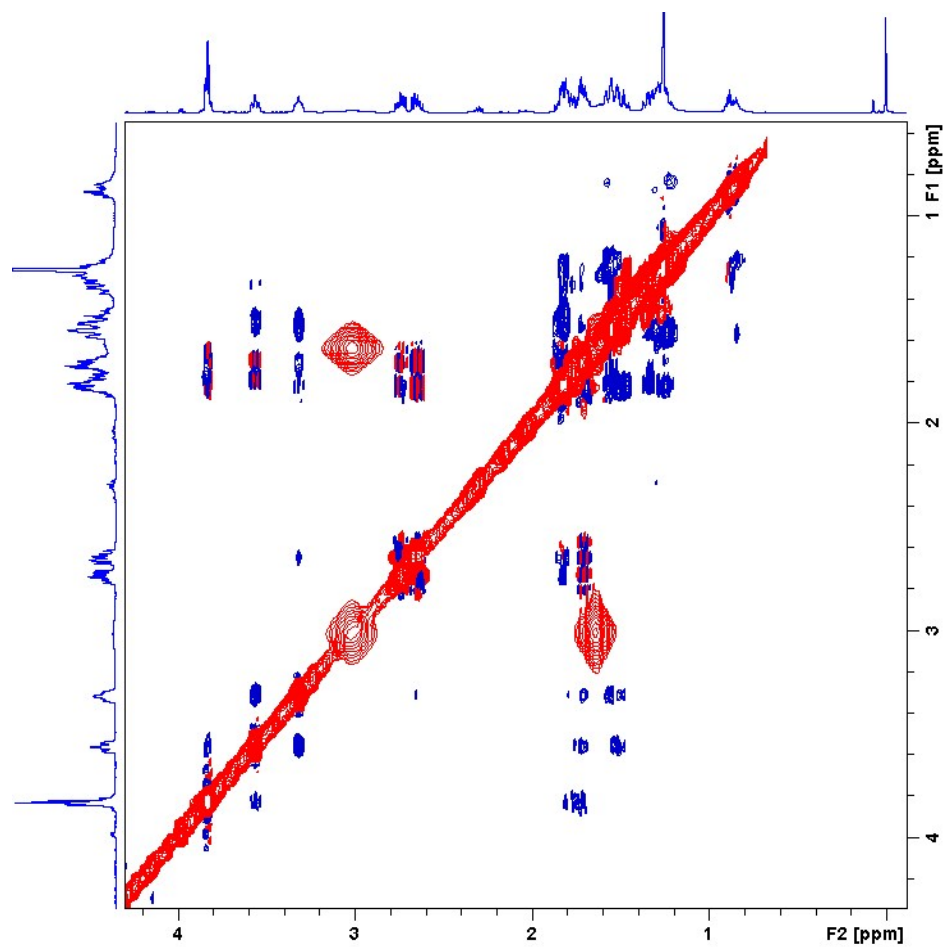

Expanded 2D  $^1\text{H}$  NOE of 5 (500 MHz,  $\text{CDCl}_3$ )

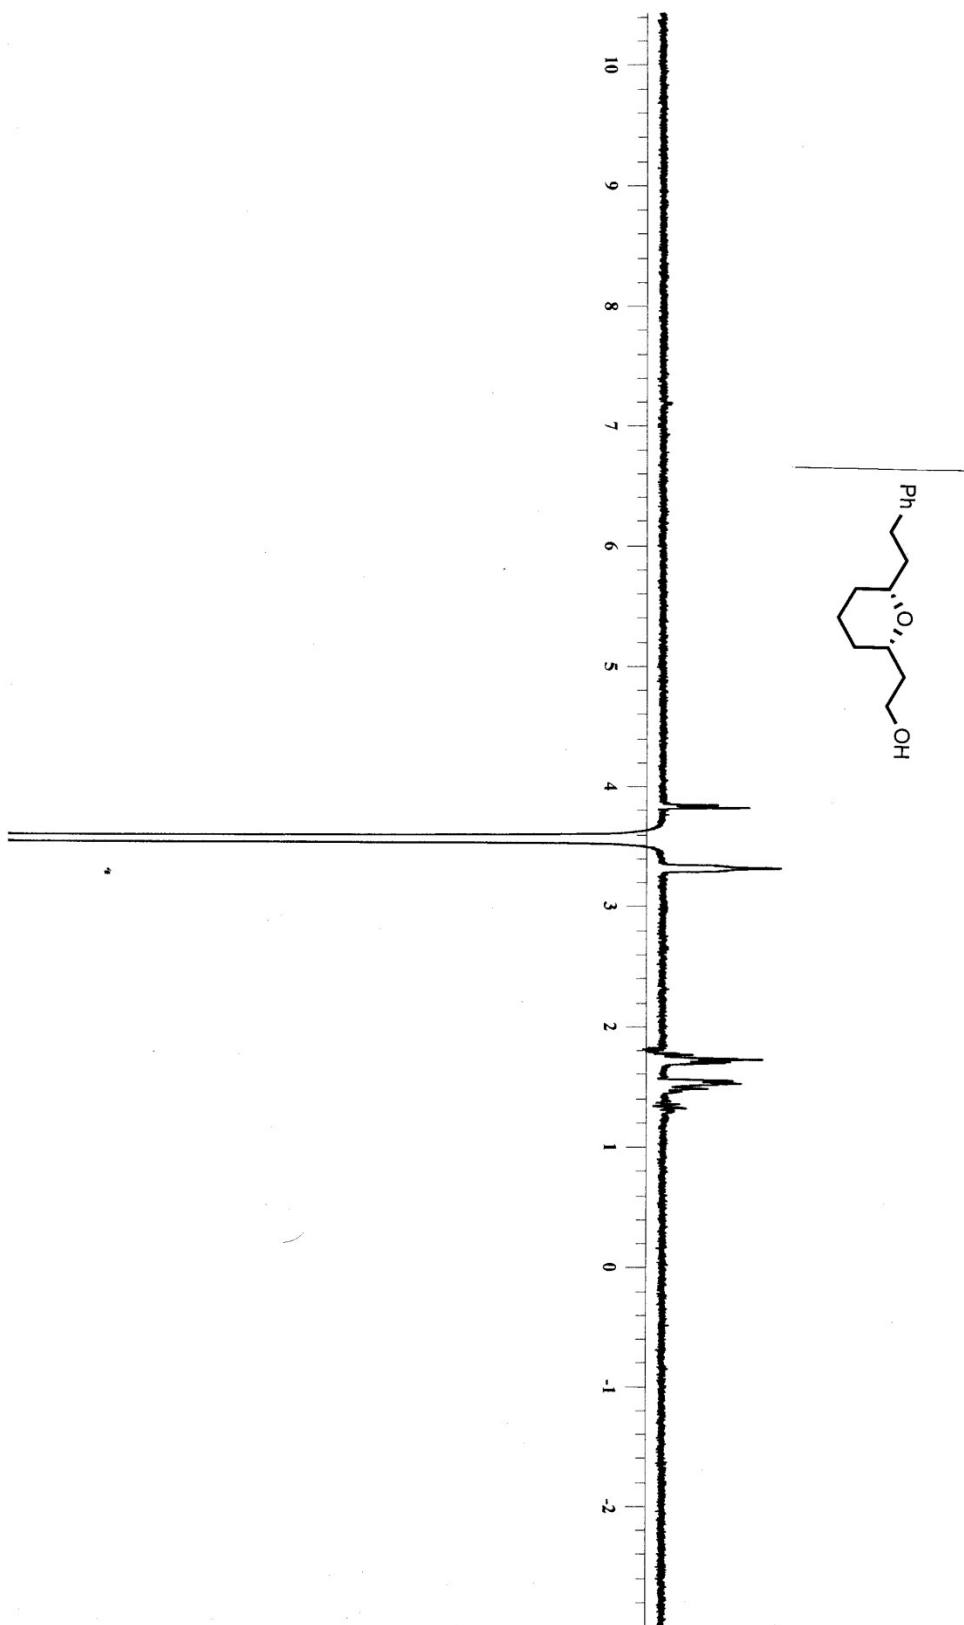

1D <sup>1</sup>H NOE of 5 at 3.56 ppm

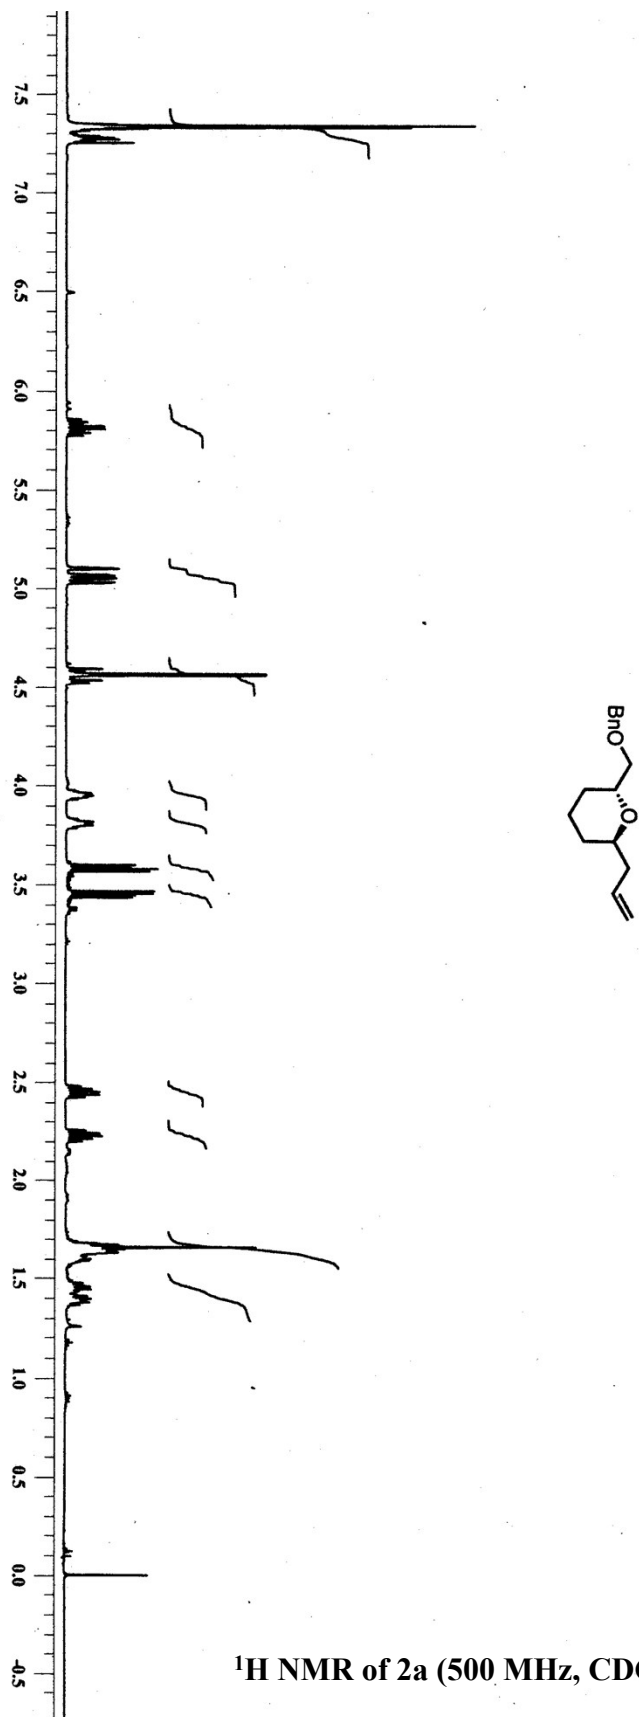

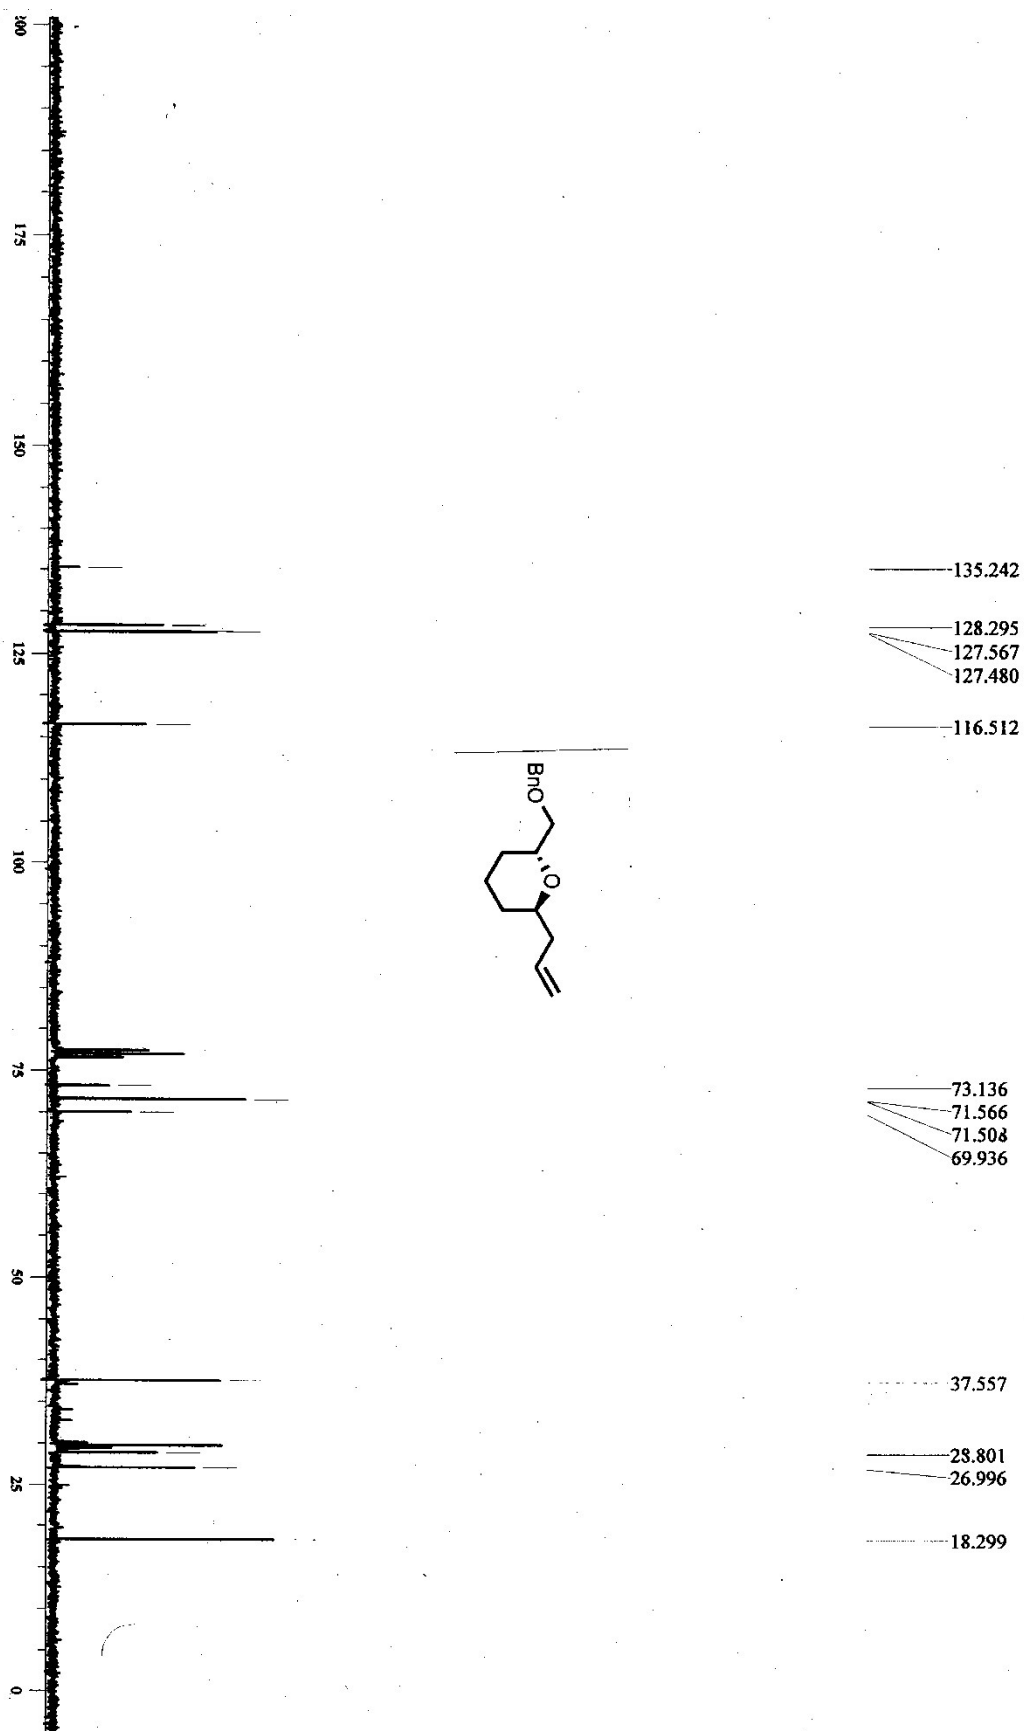

$^{13}\text{C}$  NMR of 2a (75 MHz,  $\text{CDCl}_3$ )

Data File D:\DATA\DKM2014\03012014000004.D  
 Sample Name: DKM-DL-CYC-2 246

```

=====
Acq. Operator   : V.RAJESH
Acq. Instrument : Instrument 1                Location : Vial 22
Injection Date  : 1/3/2014 12:16:33 PM      Inj Volume : 20 µl

Acq. Method     : D:\METHODS\LCM.m
Last changed    : 1/3/2014 12:36:29 PM by V.RAJESH
Analysis Method : D:\METHODS\DATURA.m
Last changed    : 1/3/2014 12:44:04 PM by V.RAJESH
Method Info     : COLUMN:ATLANTIS C181 50 X4.6MM, 5U
                  MOBILEPHASE:70% ACN IN H2O (0.1 F.A)
                  FLOWRATE:1.0ML/MIN
                  DETECTION:210NM
  
```

Sample Info :

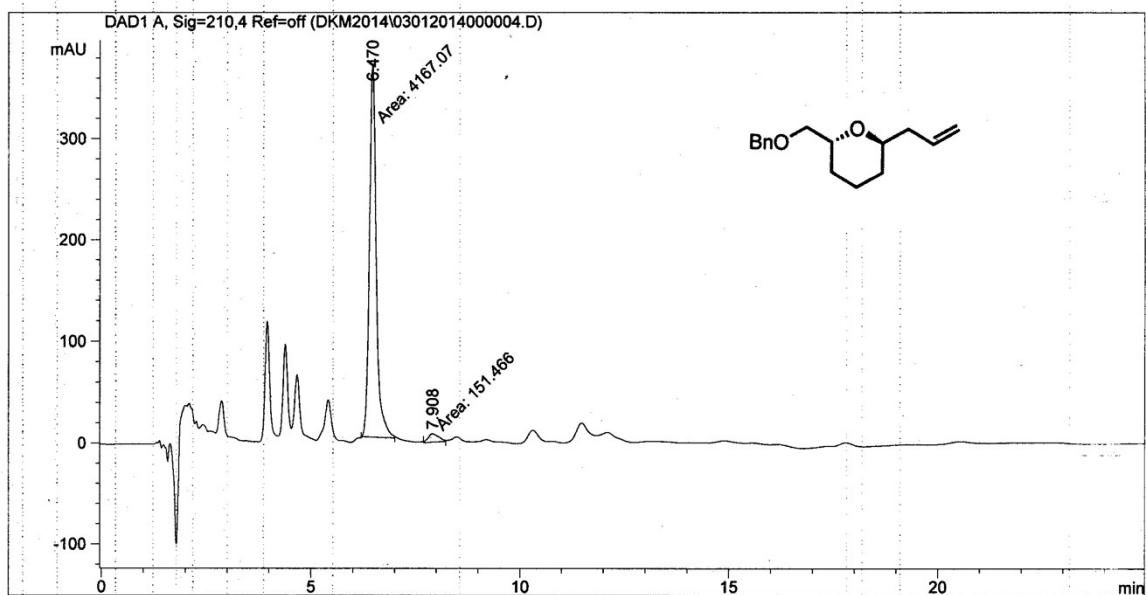

Area Percent Report

```

=====
Sorted By      : Signal
Multiplier     : 1.0000
Dilution       : 1.0000
Use Multiplier & Dilution Factor with ISTDs
  
```

Signal 1: DAD1 A, Sig=210,4 Ref=off

| Peak # | RetTime [min] | Type | Width [min] | Area [mAU*s] | Height [mAU] | Area %  |
|--------|---------------|------|-------------|--------------|--------------|---------|
| 1      | 6.470         | MM   | 0.1884      | 4167.06836   | 368.72510    | 96.4926 |
| 2      | 7.908         | MM   | 0.2983      | 151.46640    | 8.46200      | 3.5074  |

Totals : 4318.53476 377.18710

Instrument 1 1/3/2014 12:44:13 PM V.RAJESH

Page 1 of 2

HPLC of compound 2a



## Display Report - Selected Window Selected Analysis

Analysis Name: 03012014000004.D  
Method: LCM.M  
Sample Name: DKM-DL-CYC-2-246  
Analysis Info:

Instrument: LC-MSD-Trap-SL  
Operator: SARMA

Print Date: 1/3/2014 12:49:14 PM  
Acq. Date: 1/3/2014 12:16:52 PM

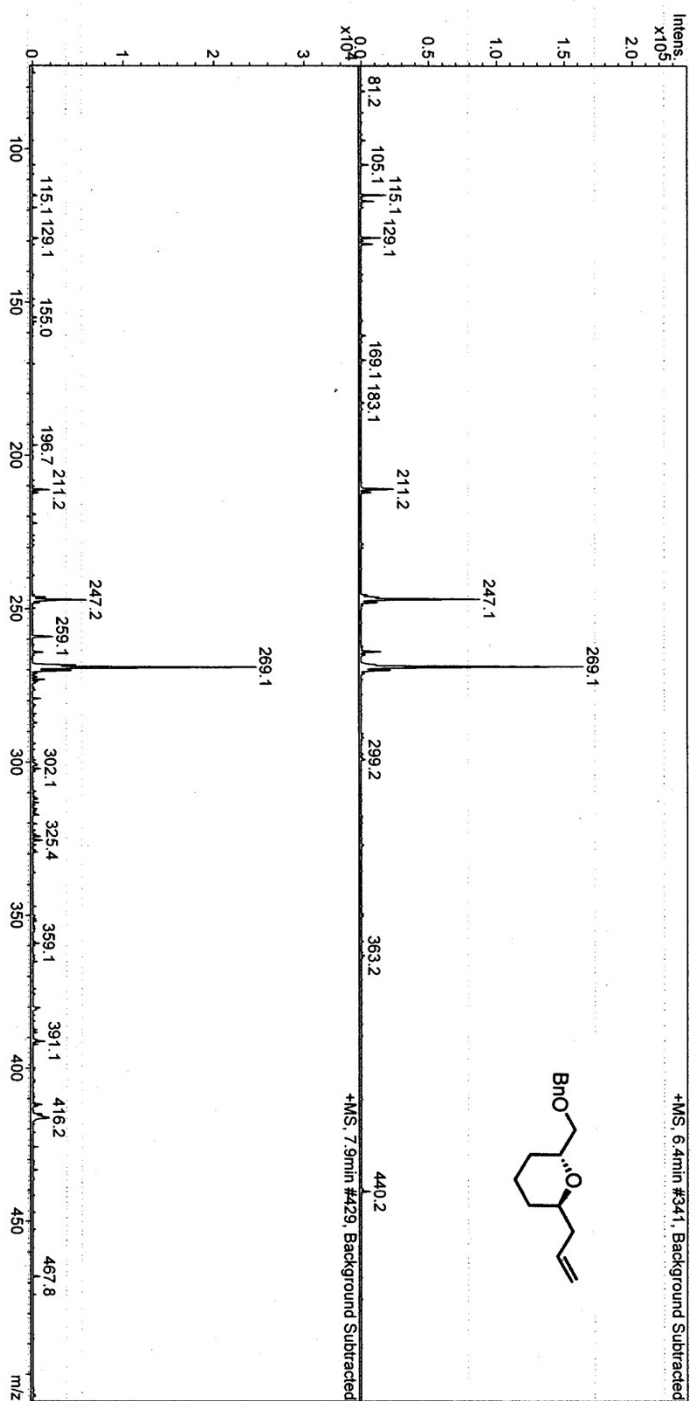

LC-MS of compound 2a

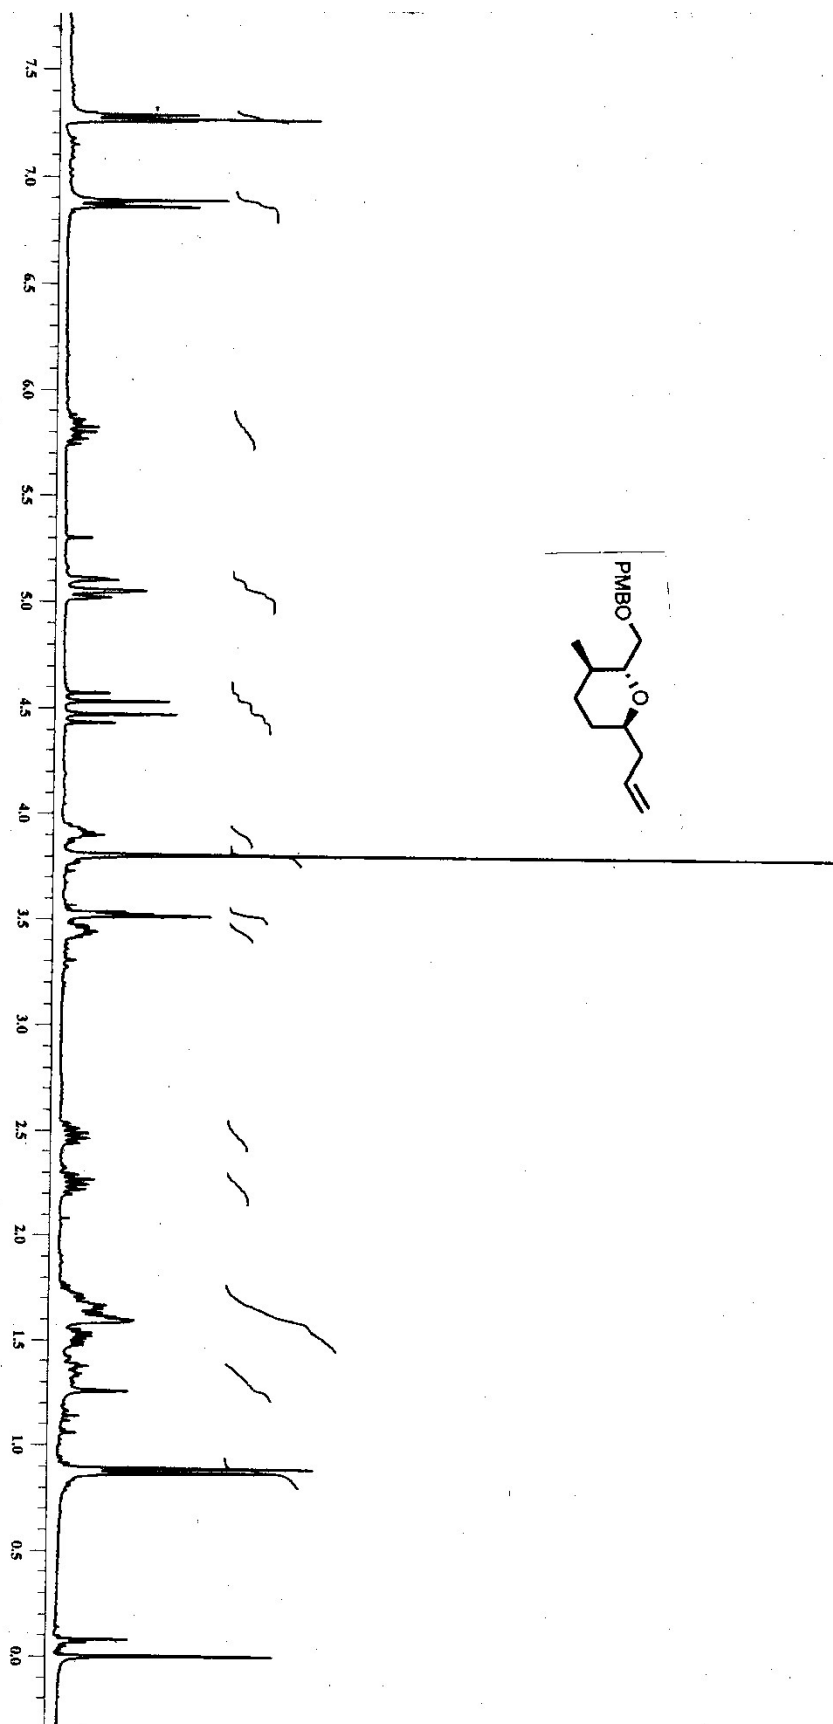

$^1\text{H NMR}$  of 2b (300 MHz,  $\text{CDCl}_3$ )

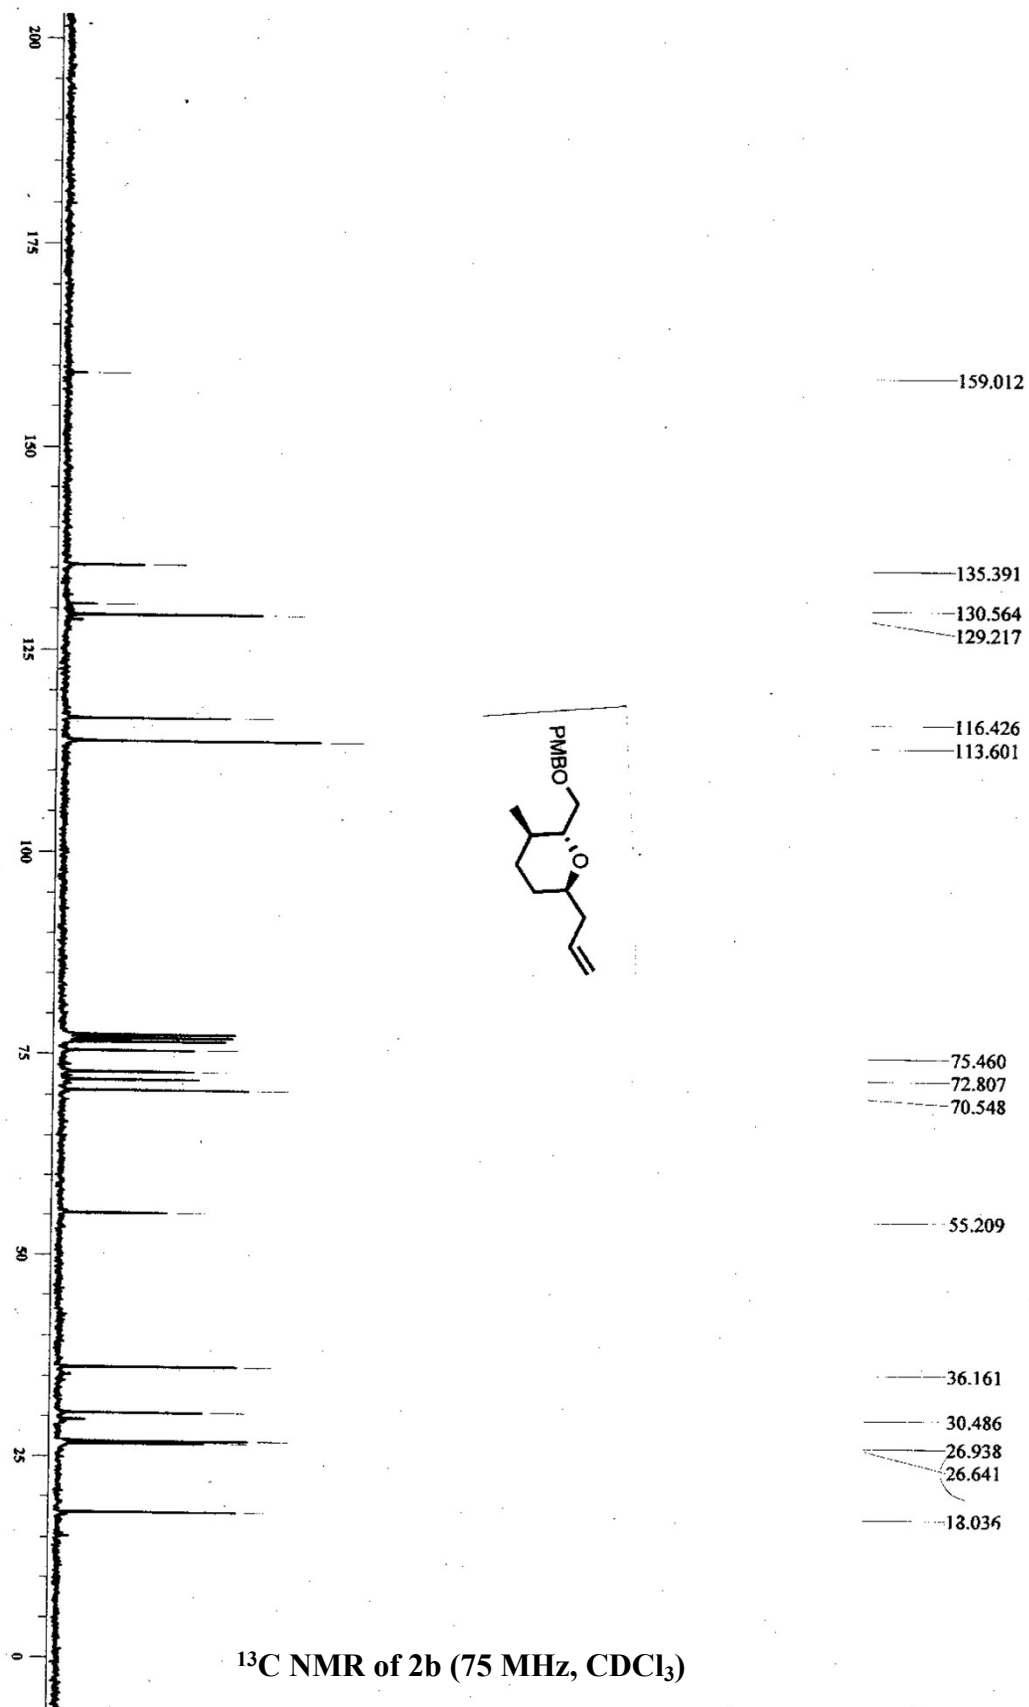

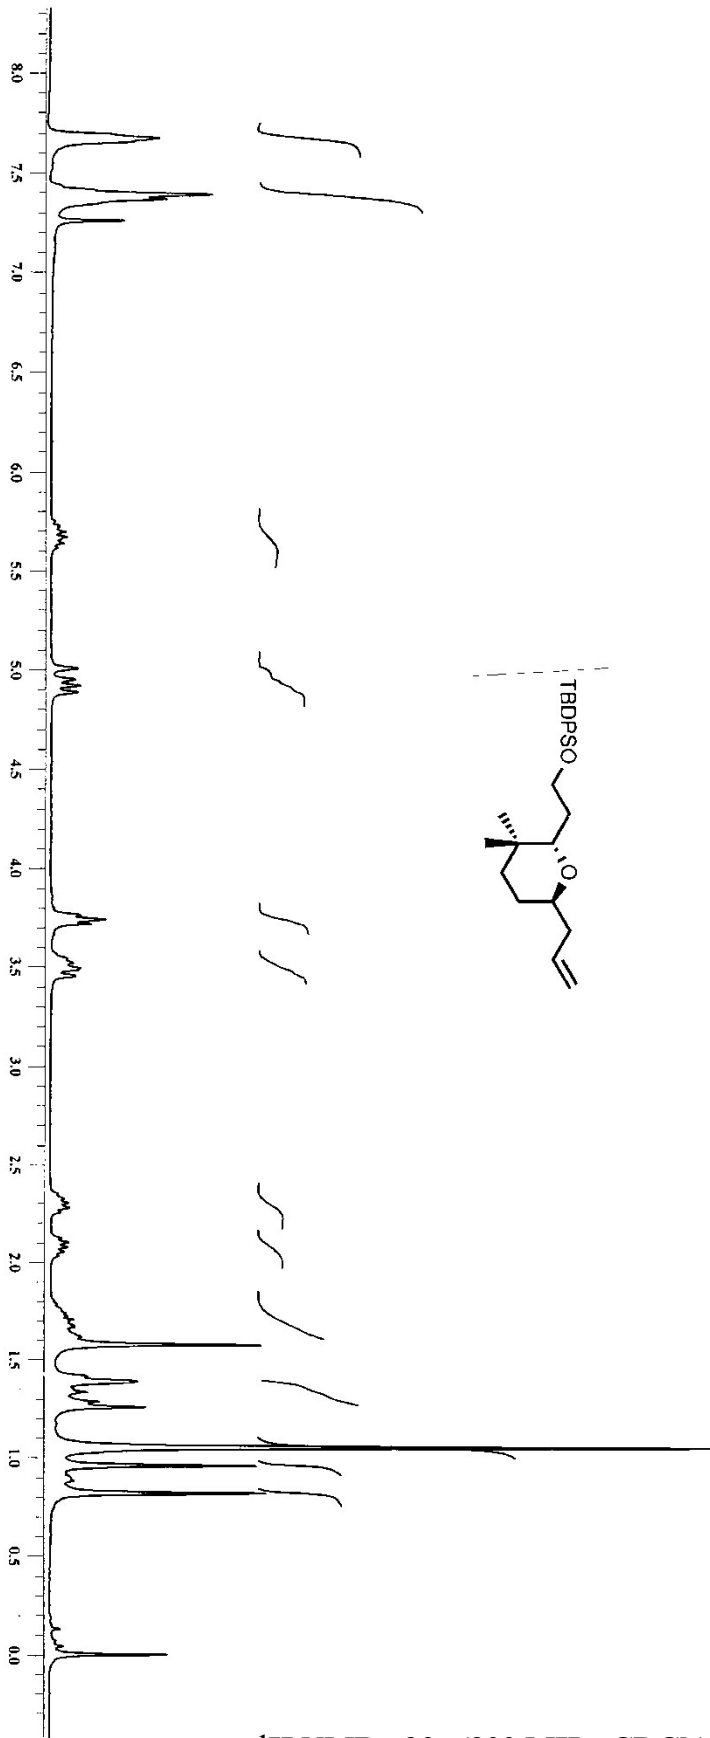

<sup>1</sup>H NMR of 2c (300 MHz, CDCl<sub>3</sub>)

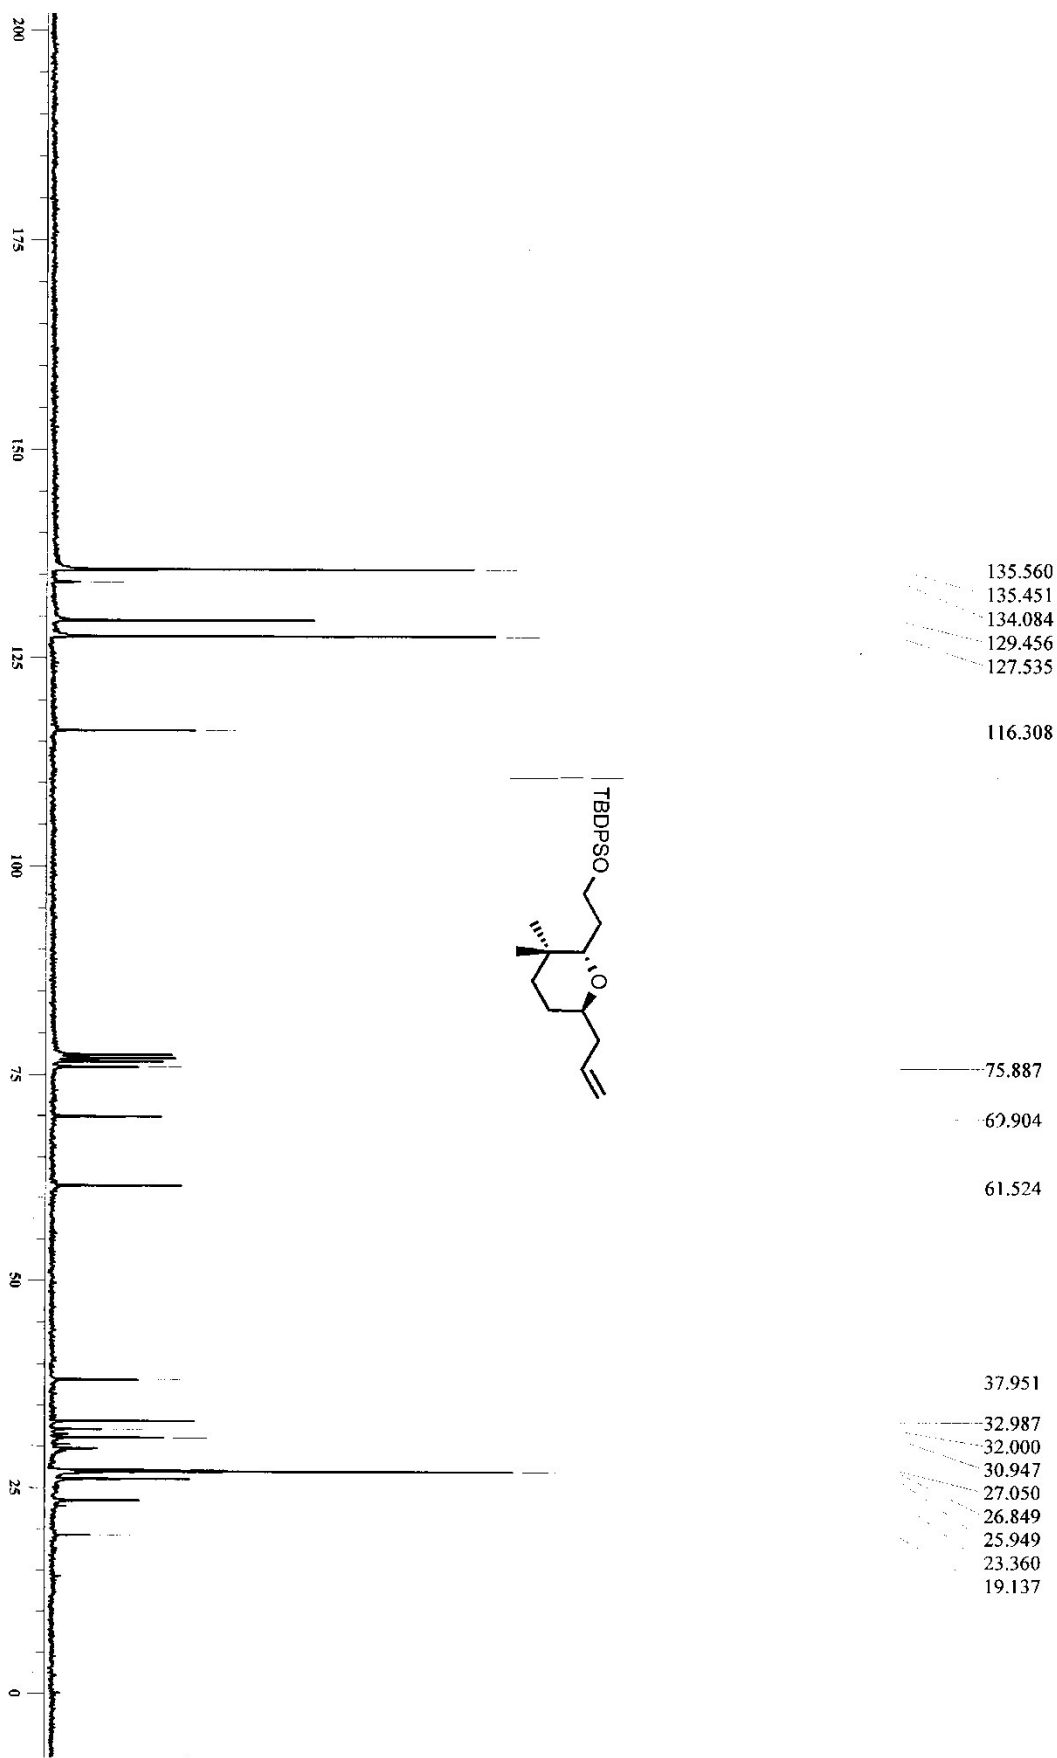

<sup>13</sup>C NMR of 2c (75 MHz, CDCl<sub>3</sub>)

Data File D:\DATA\DKM2014\22102014000002.D  
Sample Name: DKM-BKR-TBDB 436

```

=====
Acq. Operator   : V.RAJESH                      Seq. Line :    1
Acq. Instrument : Instrument 1                  Location  : Vial 32
Injection Date  : 10/22/2014 10:46:50 AM      Inj       :    1
                                                Inj Volume: 20 µl

Acq. Method    : D:\METHODS\LCM.m
Last changed   : 10/22/2014 10:59:19 AM by V.RAJESH
Analysis Method : D:\METHODS\LCM.m
Last changed   : 10/22/2014 10:05:22 AM by V.RAJESH
Method Info    : COLUMN:ATLANTIS C18,4.6 X 150MM,5U
                MOBILEPHASE:80% ACN IN WATER(0.1% F.A)
                DECTION:210NM
                FLOWRATE:1ML/MIN
=====

```

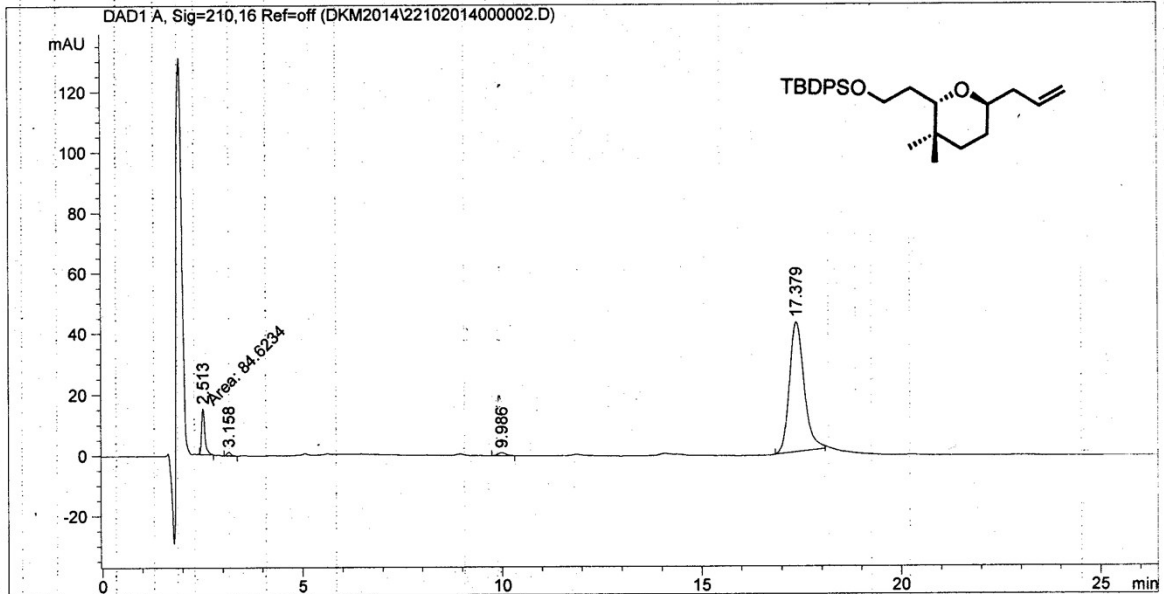

=====  
Area Percent Report  
=====

```

Sorted By      :      Signal
Multiplier     :      1.0000
Dilution       :      1.0000
Use Multiplier & Dilution Factor with ISTDs

```

Signal 1: DAD1 A, Sig=210,16 Ref=off

| Peak # | RetTime [min] | Type | Width [min] | Area [mAU*s] | Height [mAU] | Area %  |
|--------|---------------|------|-------------|--------------|--------------|---------|
| 1      | 2.513         | MM   | 0.0933      | 84.62338     | 15.11111     | 7.0739  |
| 2      | 3.158         | BB   | 0.1124      | 8.84328      | 1.22229      | 0.7392  |
| 3      | 9.986         | BB   | 0.2119      | 14.44650     | 1.00388      | 1.2076  |
| 4      | 17.379        | BB   | 0.3892      | 1088.36340   | 42.71683     | 90.9792 |

Totals :                    1196.27657    60.05410

=====  
\*\*\* End of Report \*\*\*

## Display Report - Selected Window Selected Analysis

**Analysis Name:** 22102014000002.D **Instrument:** LC-MSD-Trip-SL **Print Date:** 10/22/201 11:17:51  
**Method:** LCM.M **Operator:** SARMA **Acq. Date:** 10/22/2014 10:47:13 AM  
**Sample Name:** DKM-BKR-TBDB 436 **Analysis Info:**

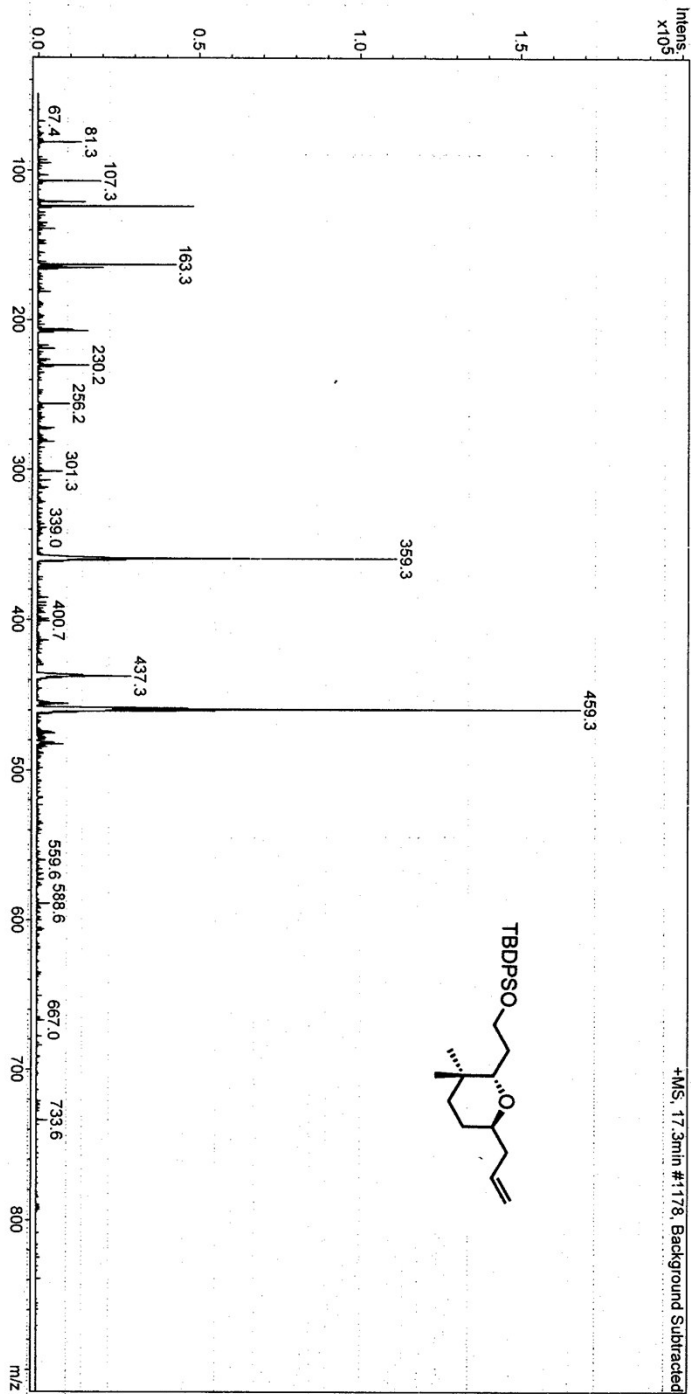

LC-MS of compound 2c

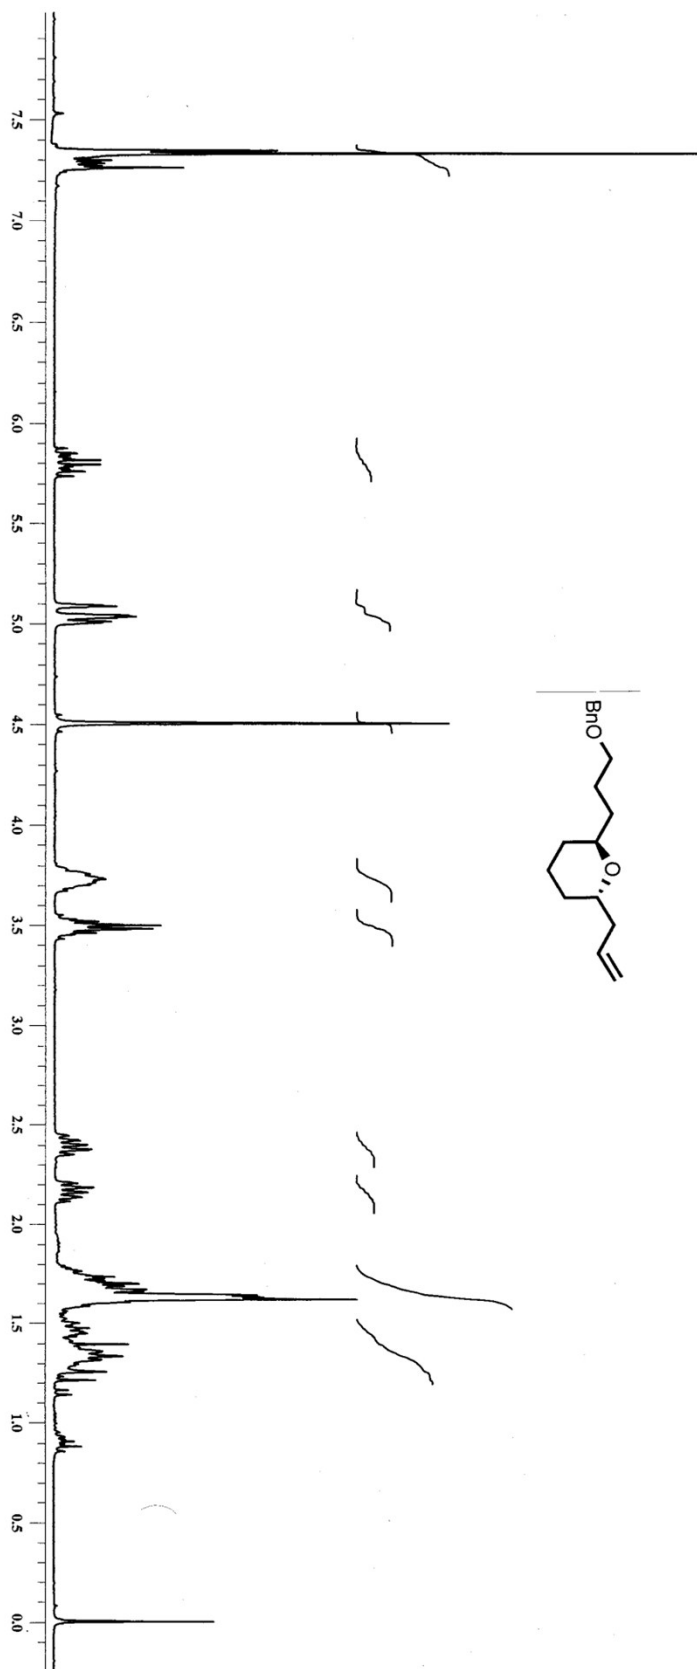

$^1\text{H}$  NMR of 2d (300 MHz,  $\text{CDCl}_3$ )



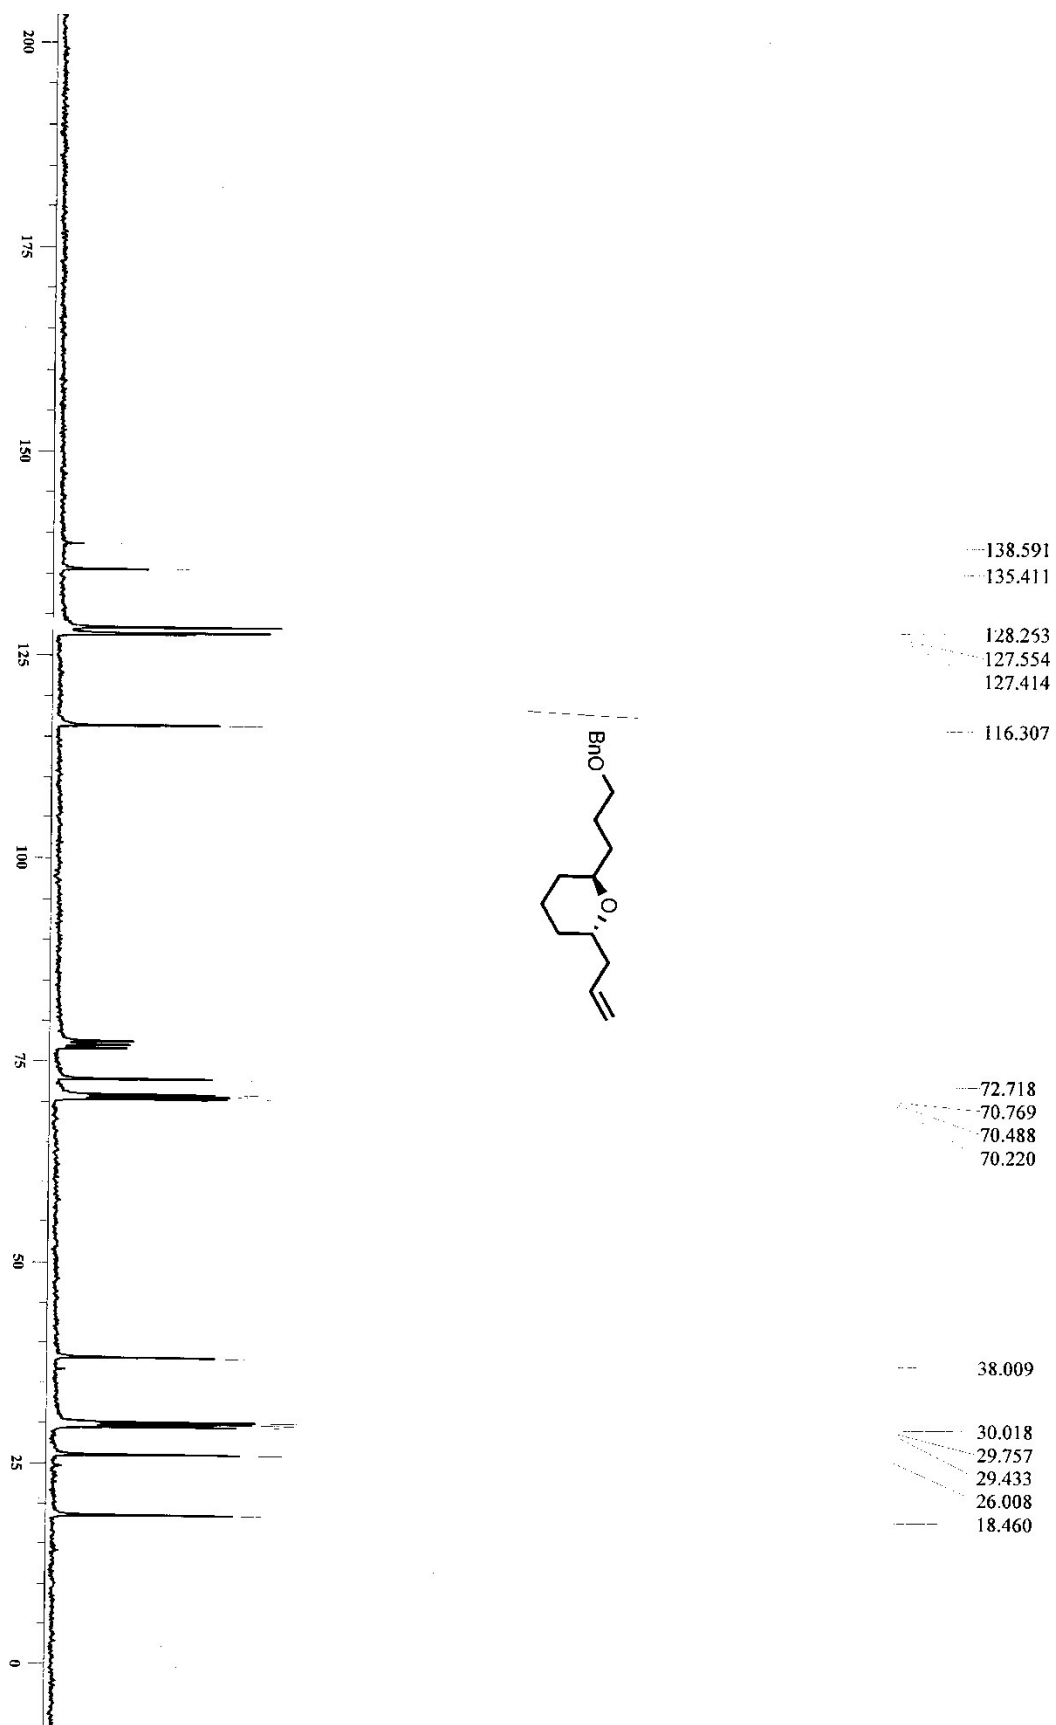

$^{13}\text{C}$  NMR of 2d (75 MHz,  $\text{CDCl}_3$ )

Data File D:\DATA\DKM2014\30102014000003.D  
 Sample Name: DKM-DSR-BN 274

```

=====
Acq. Operator   : V.RAJESH                      Seq. Line :    1
Acq. Instrument : Instrument 1                  Location  : Vial 32
Injection Date  : 10/30/2014 12:23:50 PM      Inj       :    1
                                                Inj Volume: 20 µl

Acq. Method     : D:\METHODS\LCM.m
Last changed    : 10/30/2014 12:21:45 PM by V.RAJESH
Analysis Method : D:\METHODS\LCM.m
Last changed    : 11/10/2014 11:06:17 AM by V.RAJESH
Method Info     : COLUMN:ATLANTIS C18,4.6 X 150MM 5U
                  MOBILE PHASE:80% ACN IN WATER(0.1% F.A)
                  DECTION:210NM
                  FLOWRATE:1ML/MIN
=====
  
```

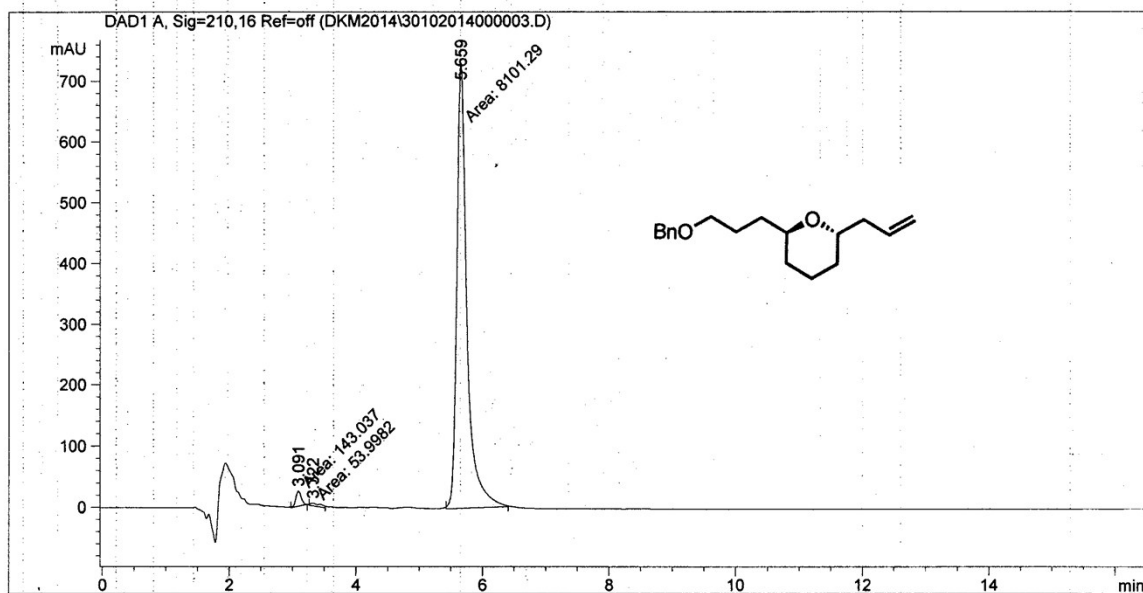

=====  
 Area Percent Report  
 =====

```

Sorted By      :      Signal
Multiplier     :      1.0000
Dilution       :      1.0000
Use Multiplier & Dilution Factor with ISTDs
  
```

Signal 1: DAD1 A, Sig=210,16 Ref=off

| Peak # | RetTime [min] | Type | Width [min] | Area [mAU*s] | Height [mAU] | Area %  |
|--------|---------------|------|-------------|--------------|--------------|---------|
| 1      | 3.091         | MM   | 0.0962      | 143.03712    | 24.77896     | 1.7237  |
| 2      | 3.322         | MM   | 0.1974      | 53.99820     | 4.55960      | 0.6507  |
| 3      | 5.659         | MM   | 0.1844      | 8101.28857   | 732.35425    | 97.6256 |

Totals :                                    8298.32390    761.69281

=====  
 \*\*\* End of Report \*\*\*

# Display Report - Selected Window Selected Analysis

Analysis Name: 30102014000003.D Instrument: LC-MSD-Trip-SL Print Date: 11/10/201 11:07:37  
Method: LCM.M Operator: SARMA Acq. Date: 10/30/2014 11:24:27 PM  
Sample Name: DKM-DSR-BN 274  
Analysis Info:

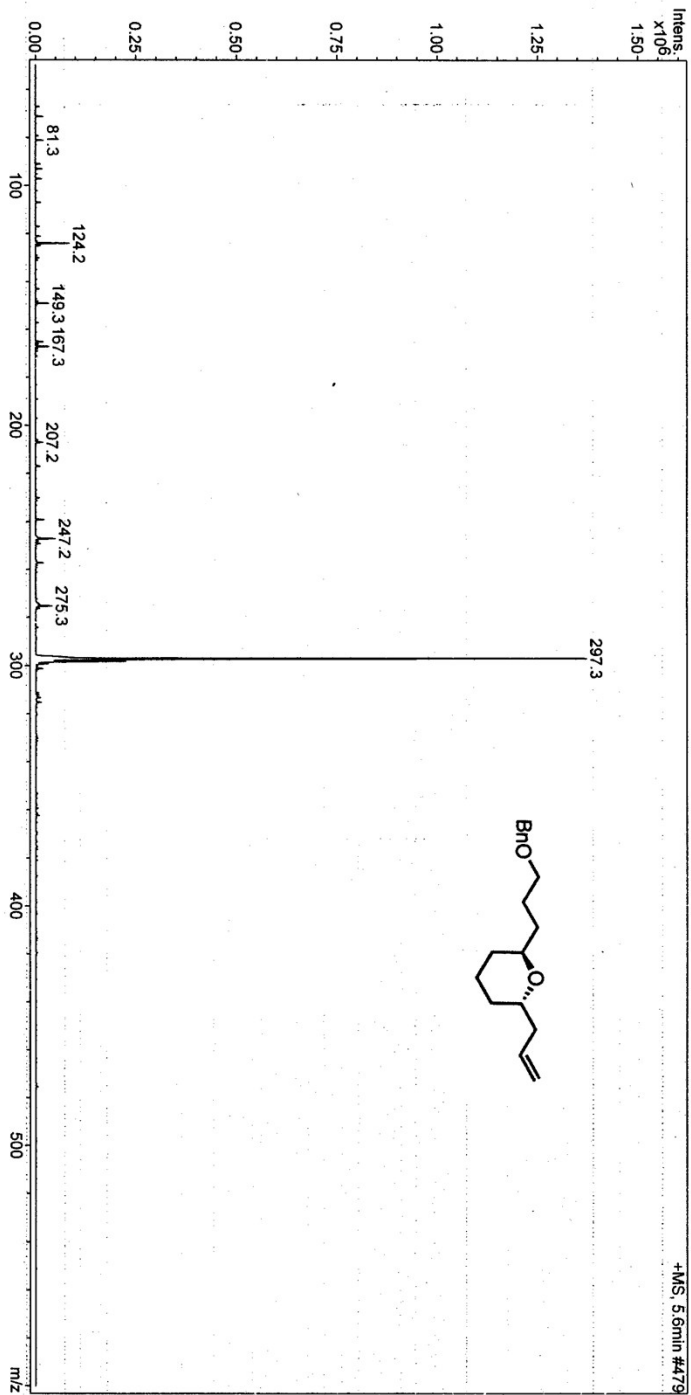

LC-MS of compound 2d

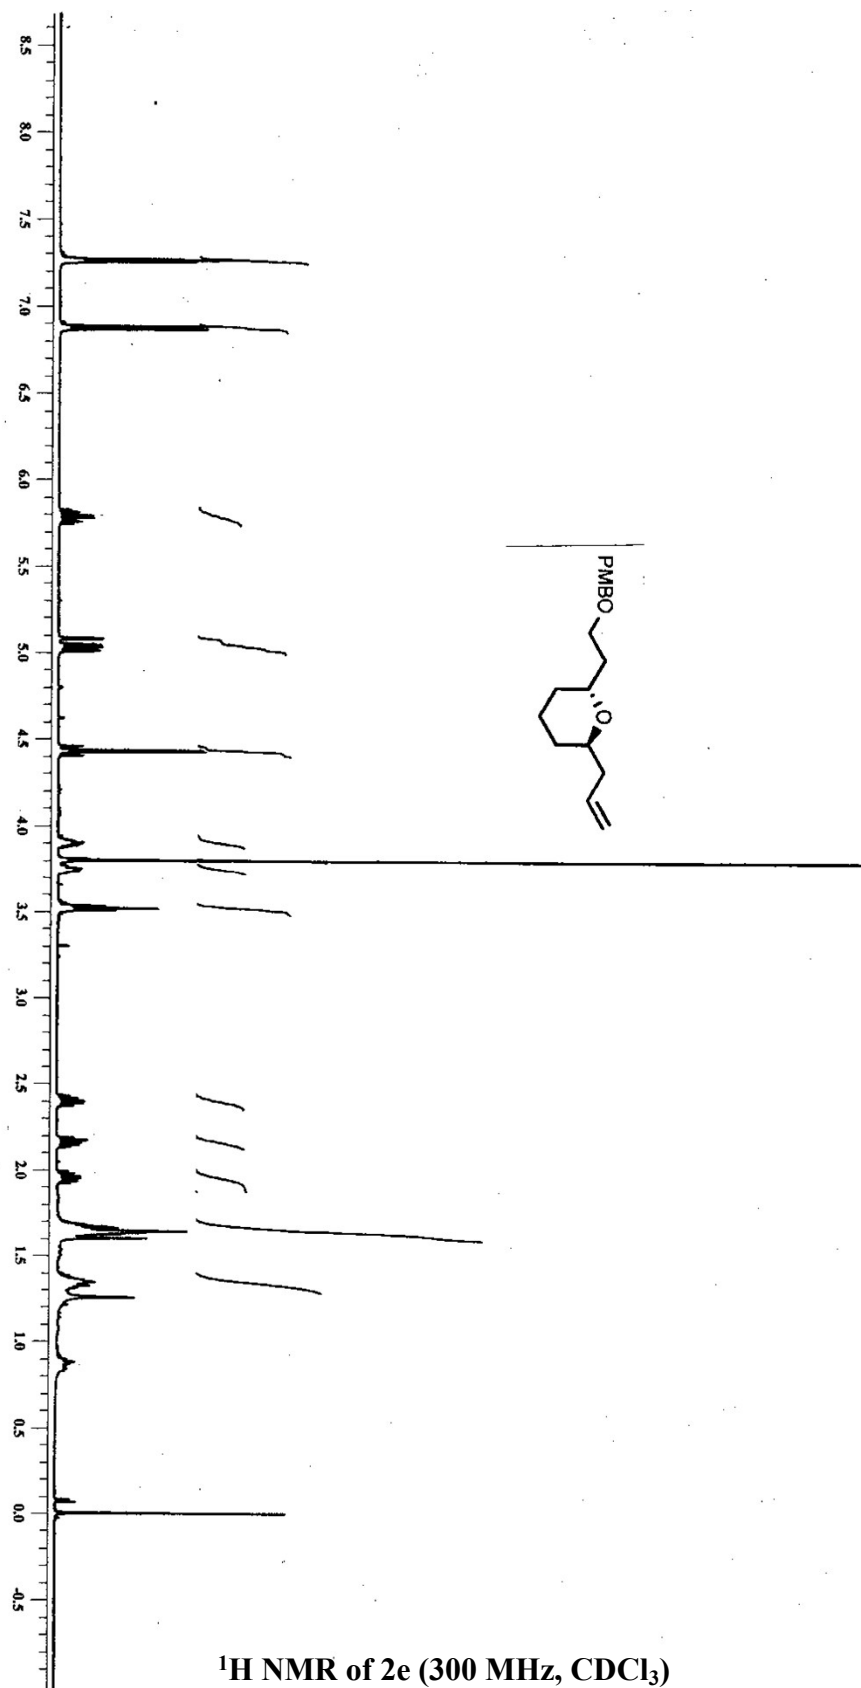

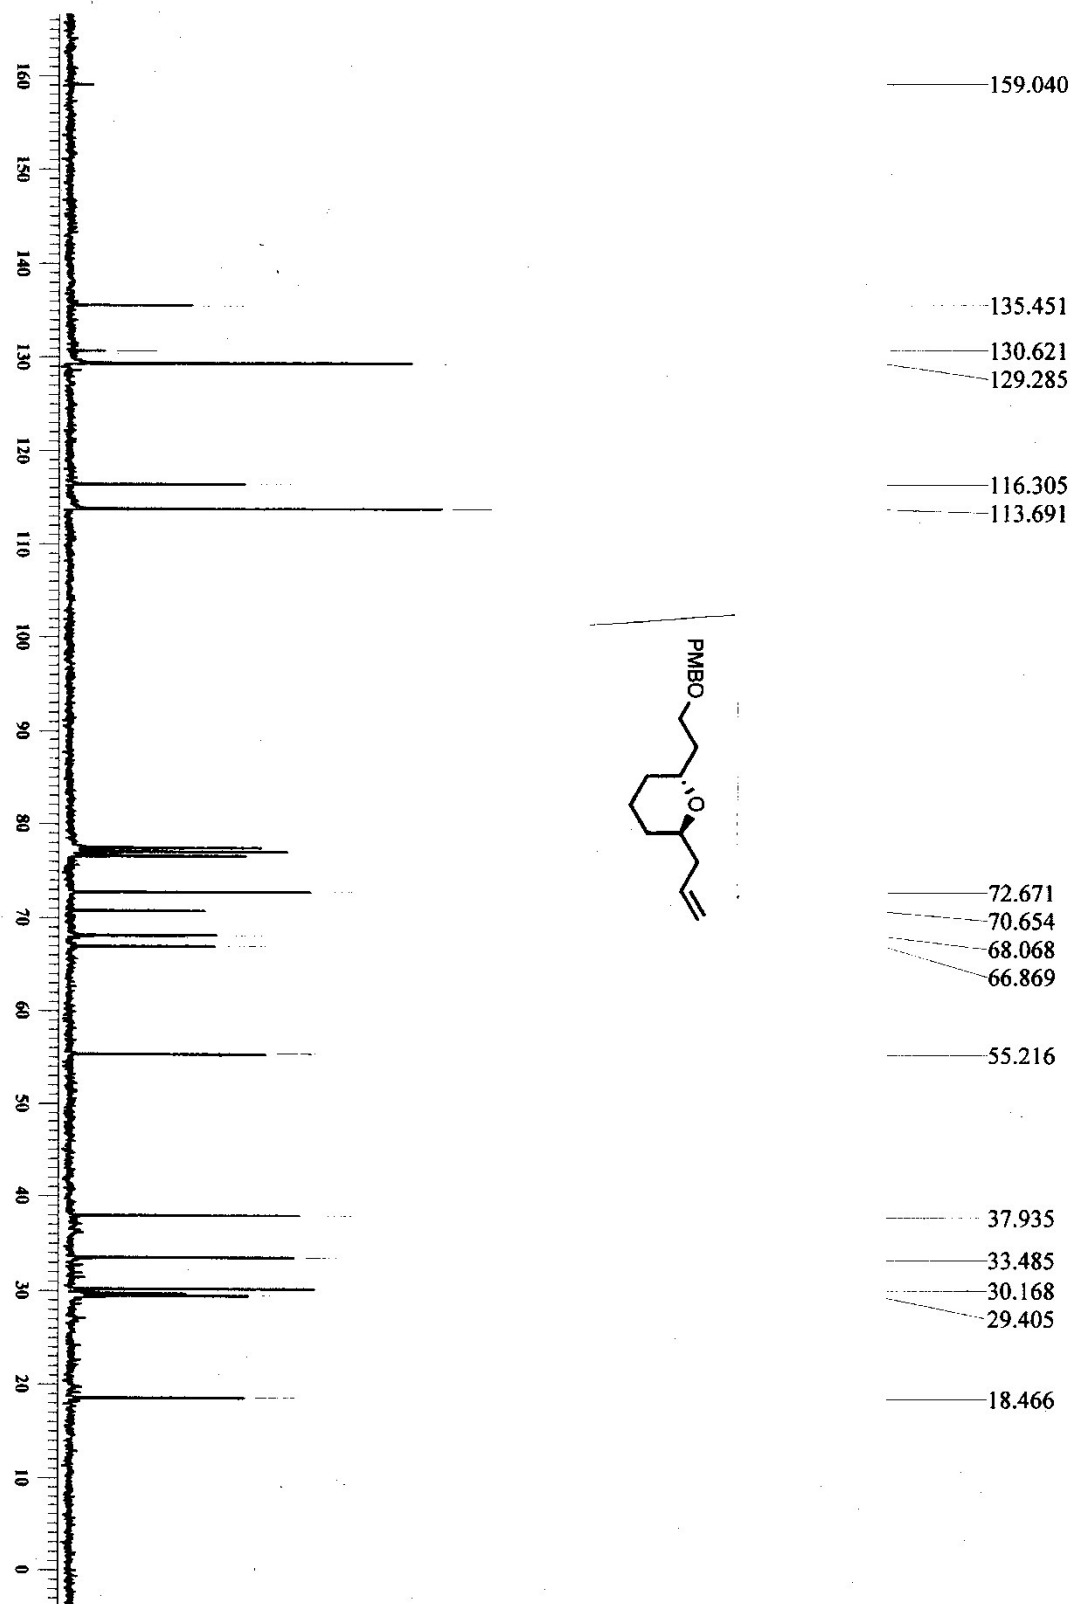

$^{13}\text{C}$  NMR of 2e (75 MHz,  $\text{CDCl}_3$ )

Sample Code : BKP-290  
 Data File : 071015....6.lcd  
 Method : LC-MS Lab Method.lcm  
 Injection Volume : 20  
 Date Acquired : 10/7/2015 11:45:09 AM  
 Report File : LC-MS Data Report.lsr  
 Chromatographic Conditions : Column: Phenosphere ODS (2) (250 X 4.6mm, 5.0 u)  
 Mobile Phase: 70% MeOH in 0.1% FA, 1.0 mL/min

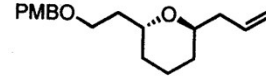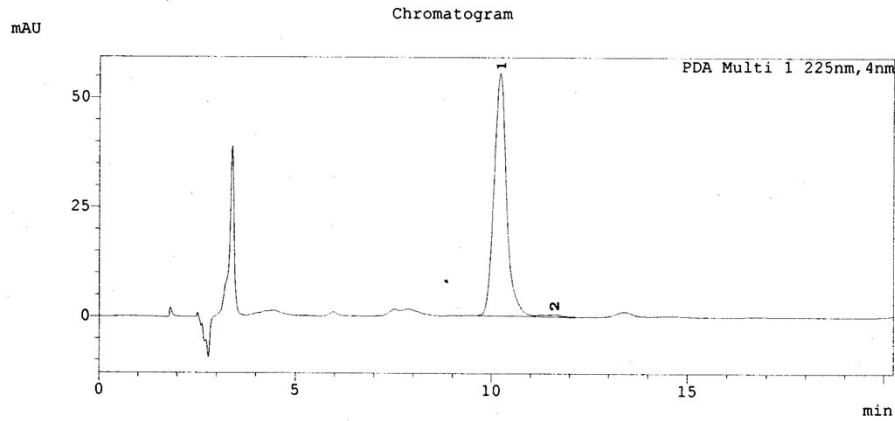

Peak Table

| Peak# | Ret. Time | Peak Start | Peak End | Area    | Area%   |
|-------|-----------|------------|----------|---------|---------|
| 1     | 10.222    | 9.557      | 11.072   | 1241411 | 98.723  |
| 2     | 11.612    | 11.072     | 12.160   | 16053   | 1.277   |
| Total |           |            |          | 1257464 | 100.000 |

Q1 Scan Positive+  
 \$If\$(SpPrTab==SpPrTab) Spectrum Mode:Averaged 9.960-10.693(3985-4278)  
 BG Mode:Averaged 3.063-9.760(1226-3905)

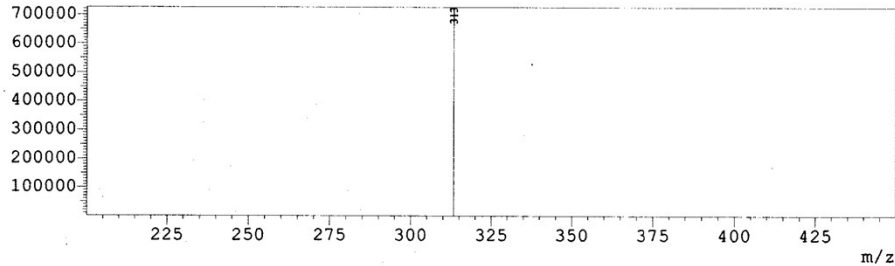

Q1 Scan Positive+  
 \$If\$(SpPrTab==SpPrTab) Spectrum Mode:Averaged 11.260-12.025(4505-4811)  
 BG Mode:Averaged 12.193-20.255(4878-8103)

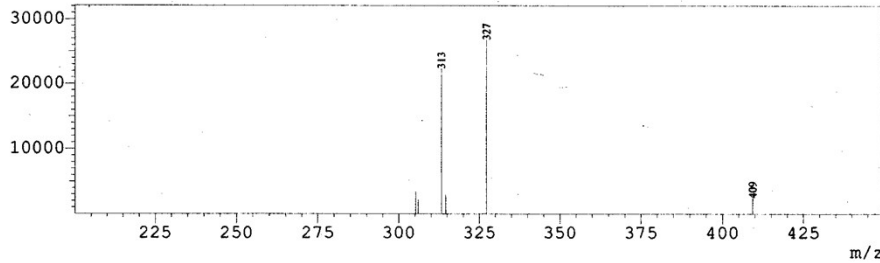

LC-MS REPORT

HPLC of compound 2e

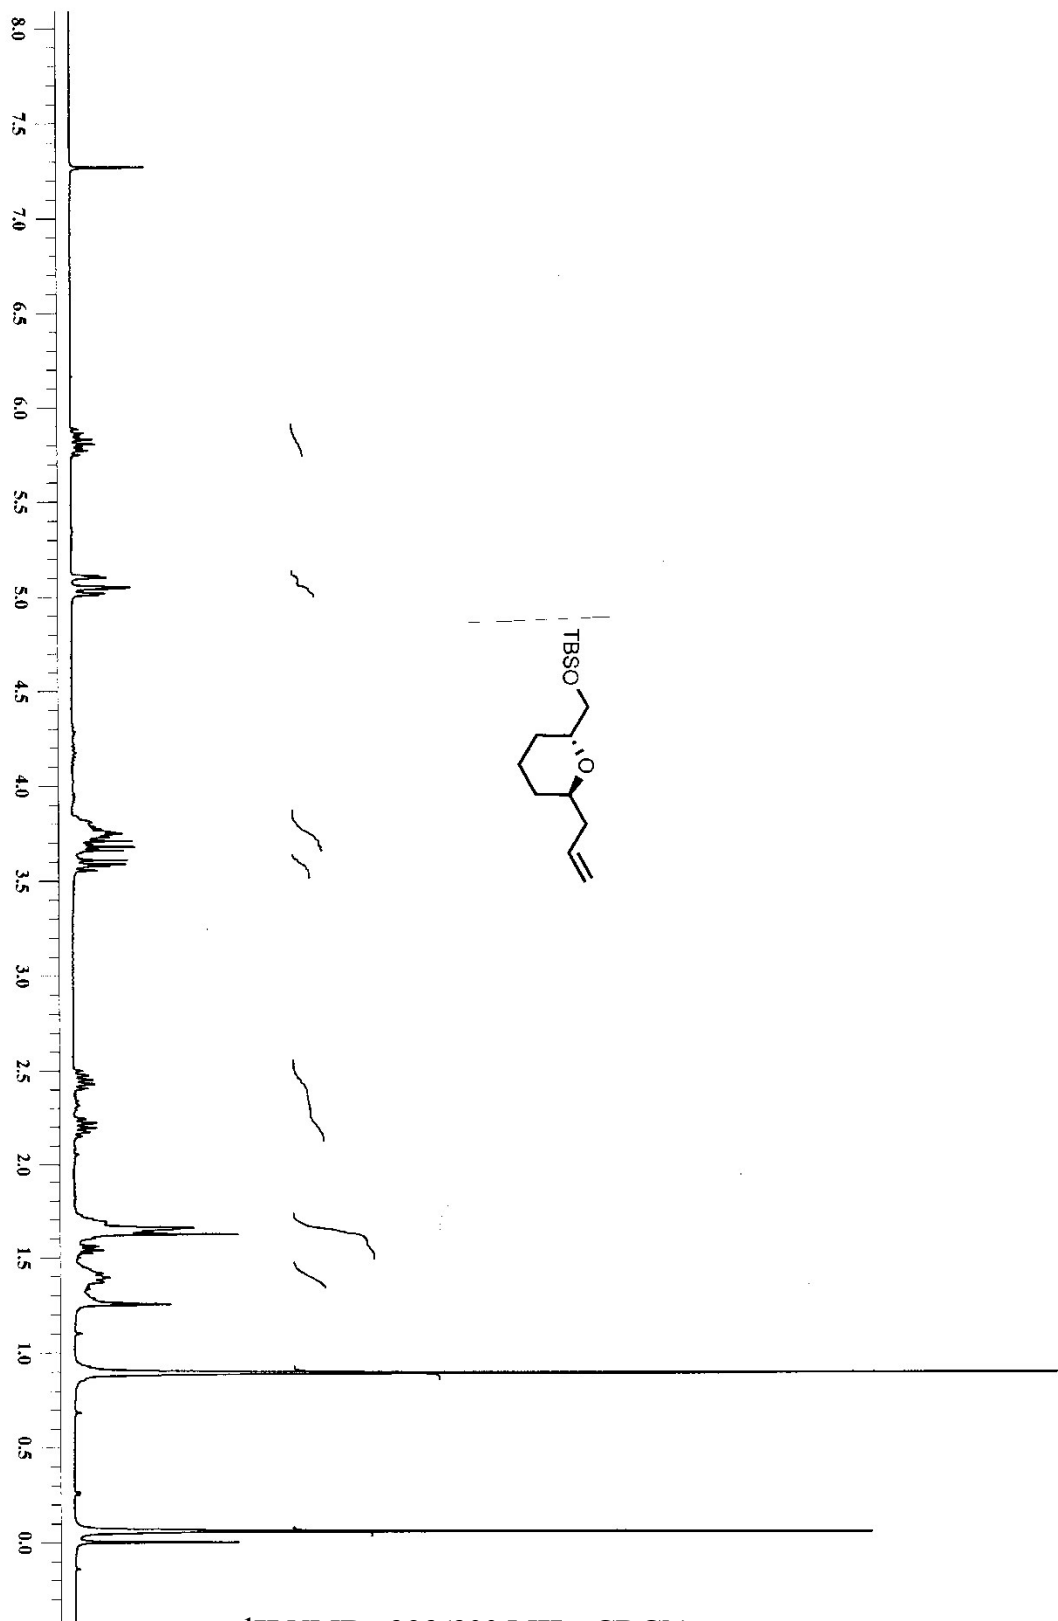

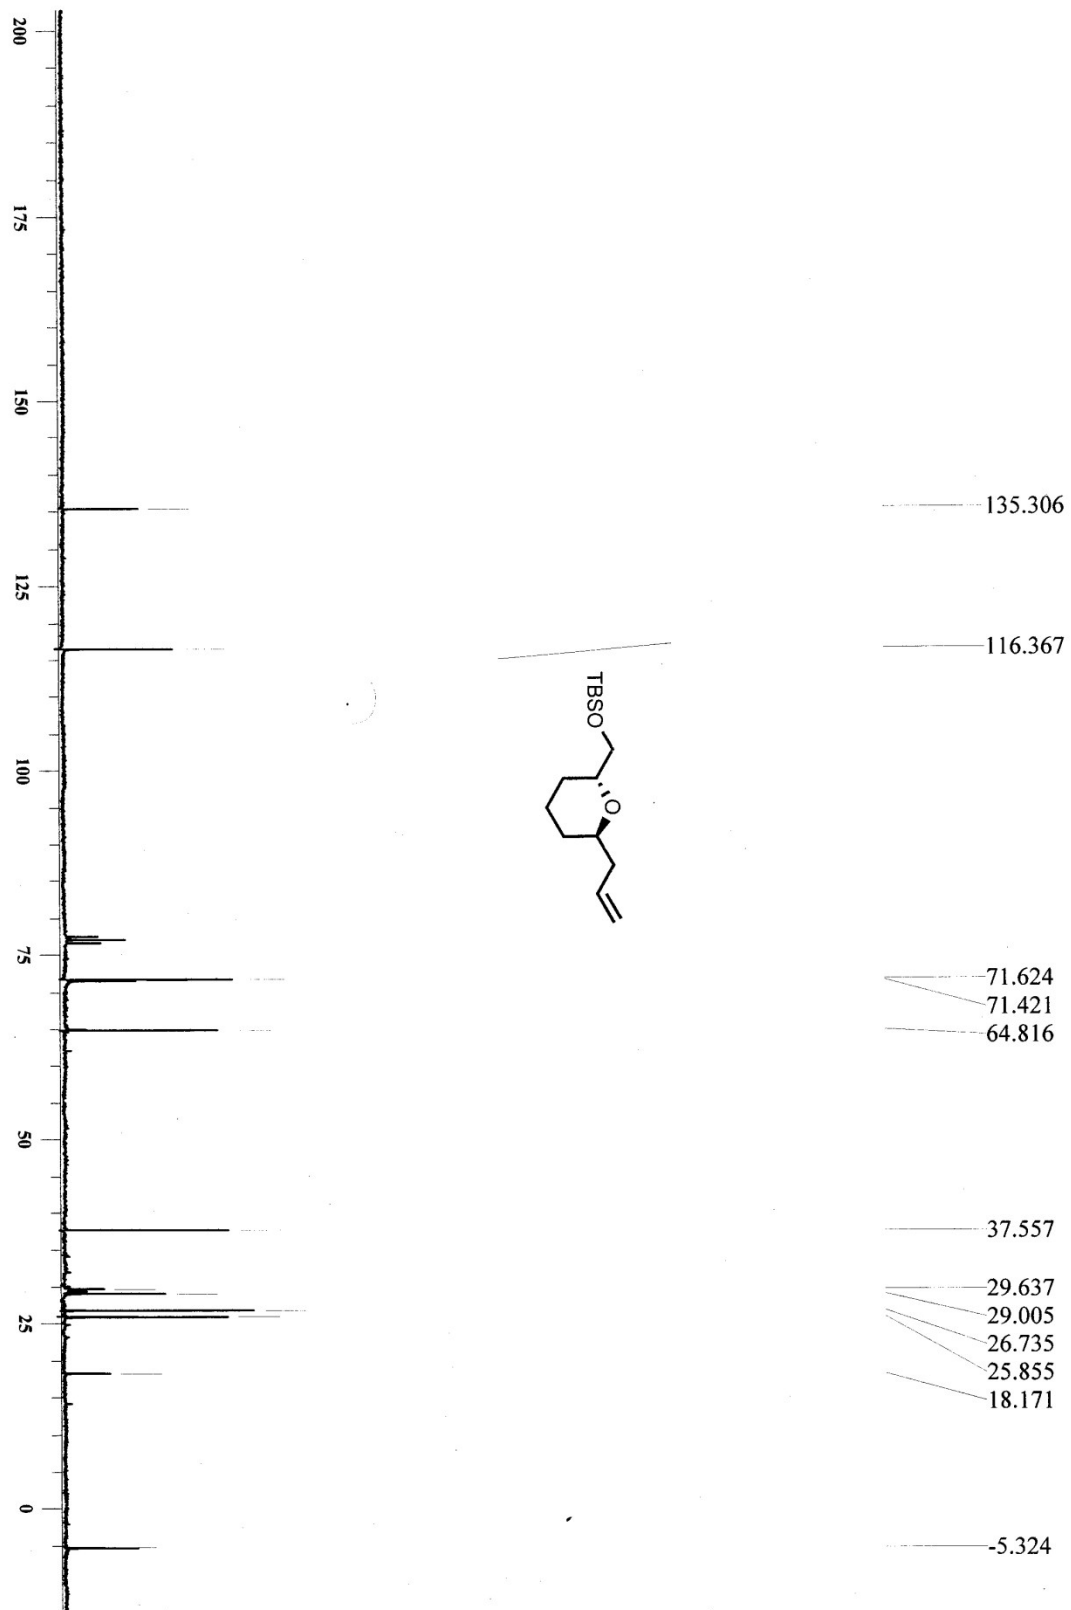

**<sup>13</sup>C NMR of 2f (75 MHz, CDCl<sub>3</sub>)**



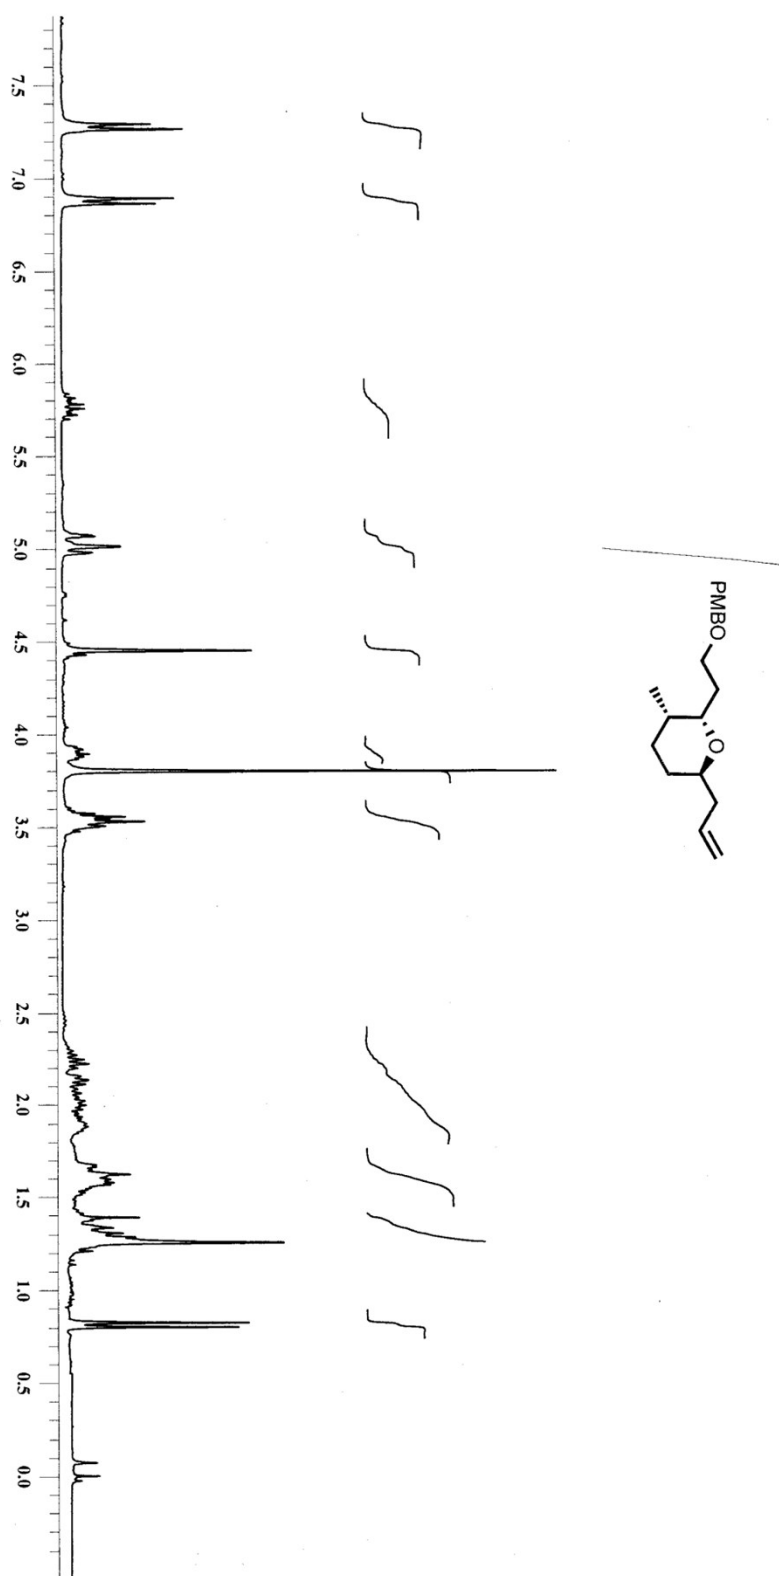

$^1\text{H NMR}$  of 2g (300 MHz,  $\text{CDCl}_3$ )

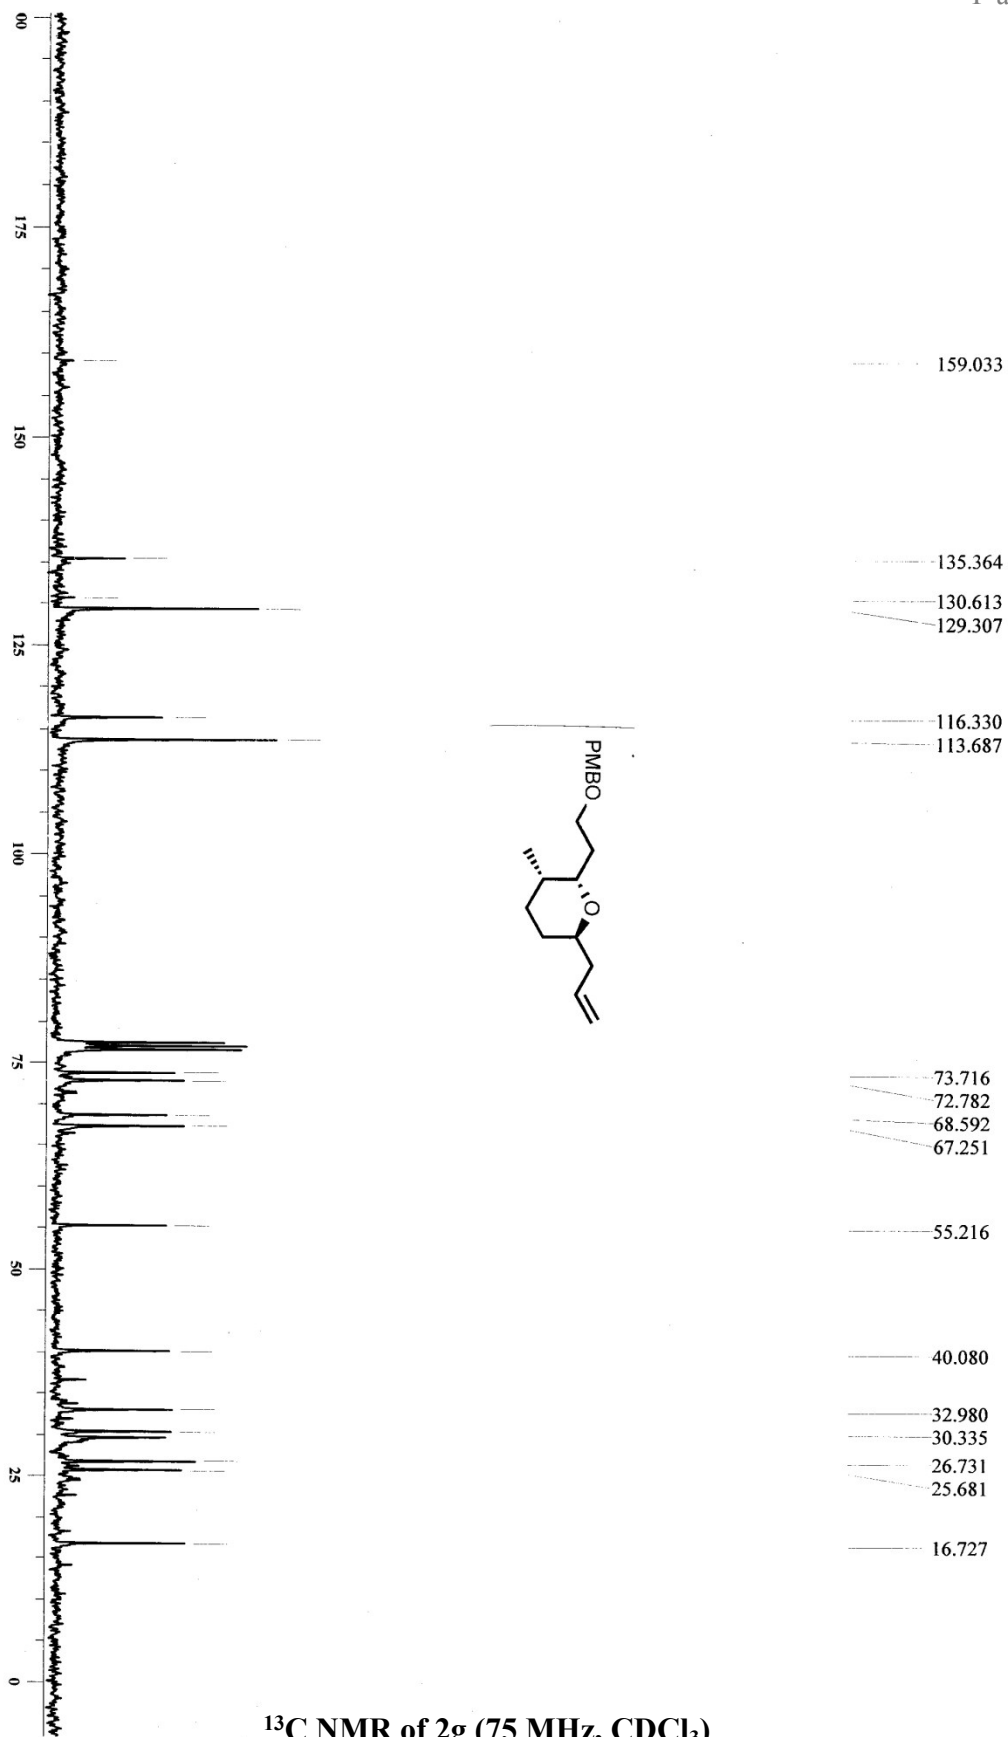

Sample Code : DKM-BKP-304  
 Data File : 131015.2.1cd  
 Method : LC-MS Lab Method.lcm  
 Injection Volume : 20  
 Date Acquired : 10/13/2015 11:20:16 AM  
 Report File : LC-MS Data Report.lsr  
 Chromatographic Conditions : Column: Atlantis C18 (150 X4.6mm, 5.0u)  
 Mobile Phase: 75% MeOH in 0.1% FA  
 Flowrate: 1.0 mL/min

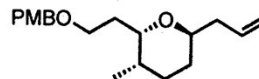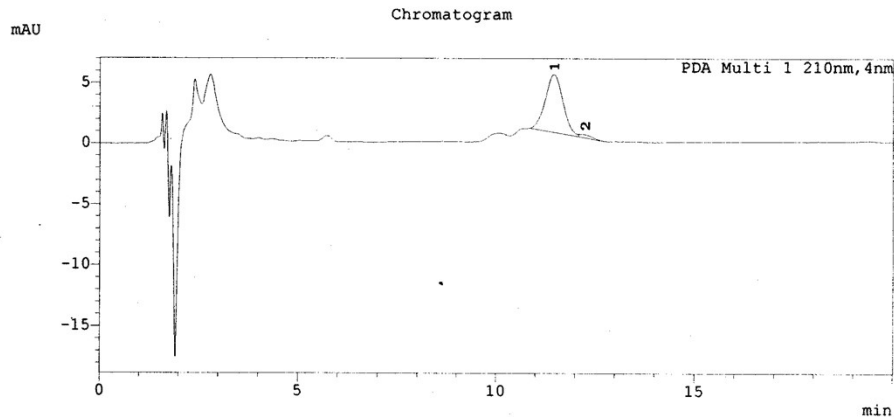

Peak Table

| Peak# | Ret. Time | Peak Start | Peak End | Area   | Area%   |
|-------|-----------|------------|----------|--------|---------|
| 1     | 11.462    | 10.869     | 12.085   | 147913 | 96.579  |
| 2     | 12.245    | 12.085     | 12.704   | 5239   | 3.421   |
| Total |           |            |          | 153152 | 100.000 |

Q1 Scan Positive+  
 \$If\$(SpPrTab==SpPrTab) Spectrum Mode:Averaged 10.887-11.873(6533-7125)  
 BG Mode:Averaged 1.085-10.788(652-6474)

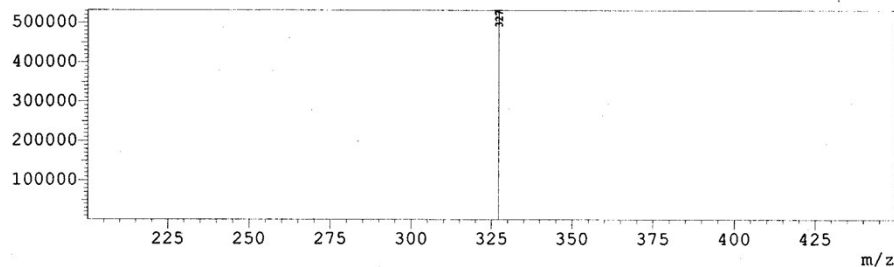

Q1 Scan Positive+  
 \$If\$(SpPrTab==SpPrTab) Spectrum Mode:Averaged 11.873-12.498(7125-7500)  
 BG Mode:Averaged 0.855-11.807(514-7085)

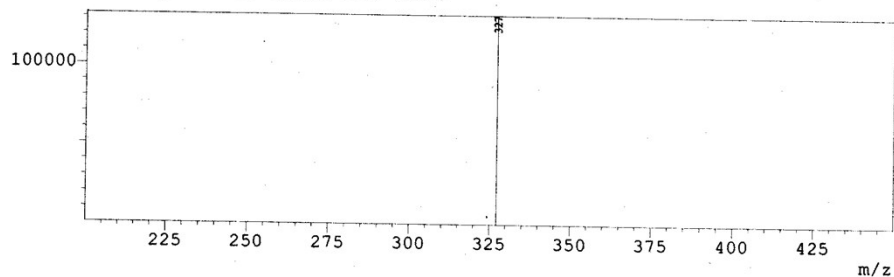

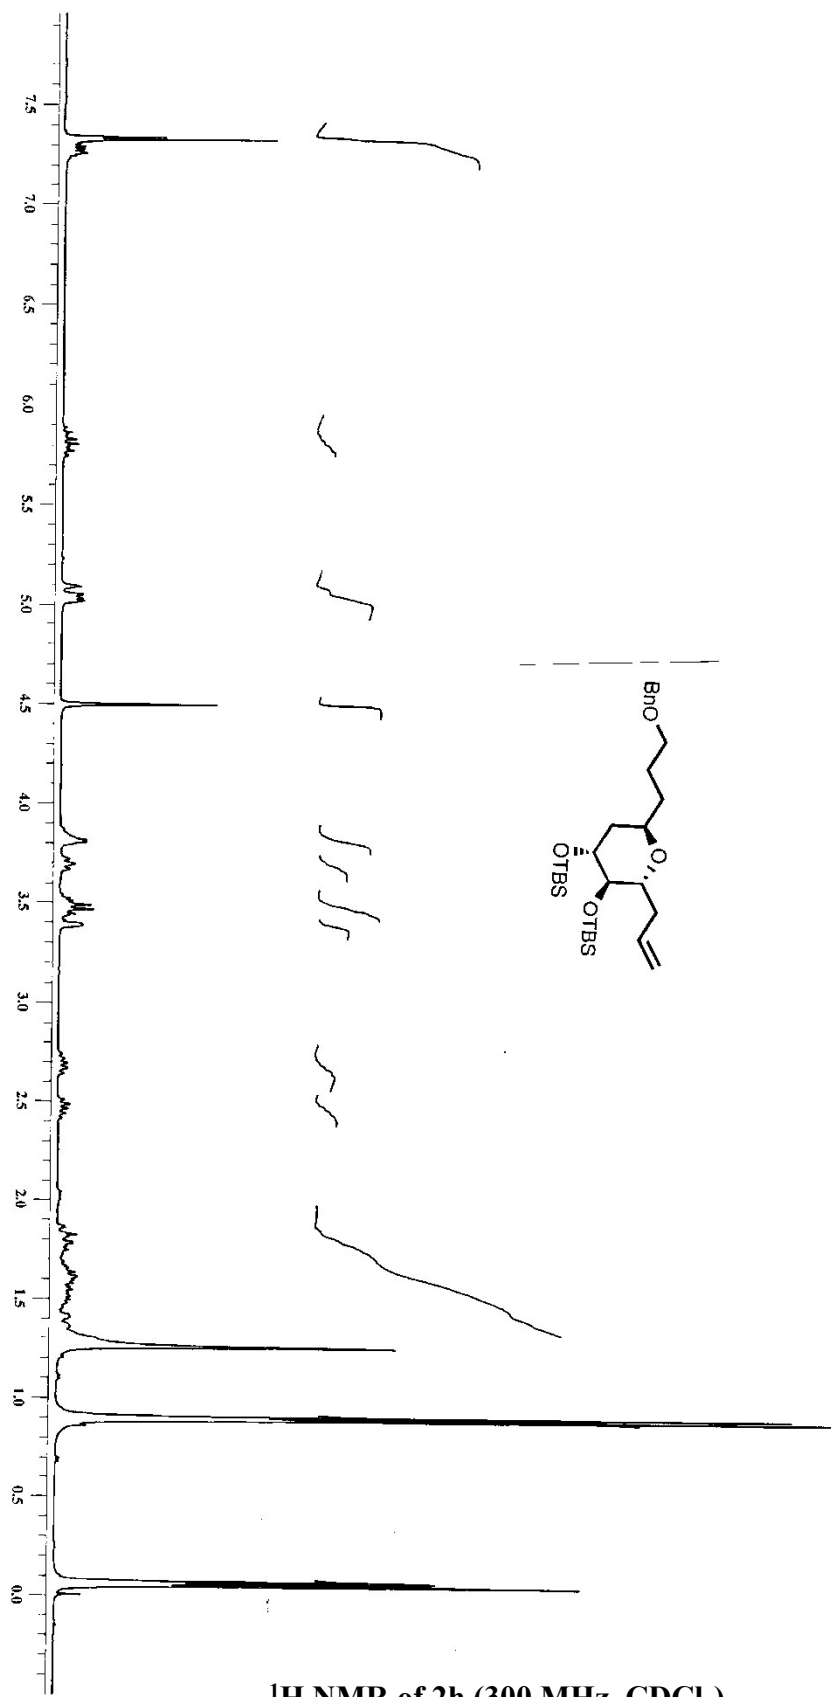

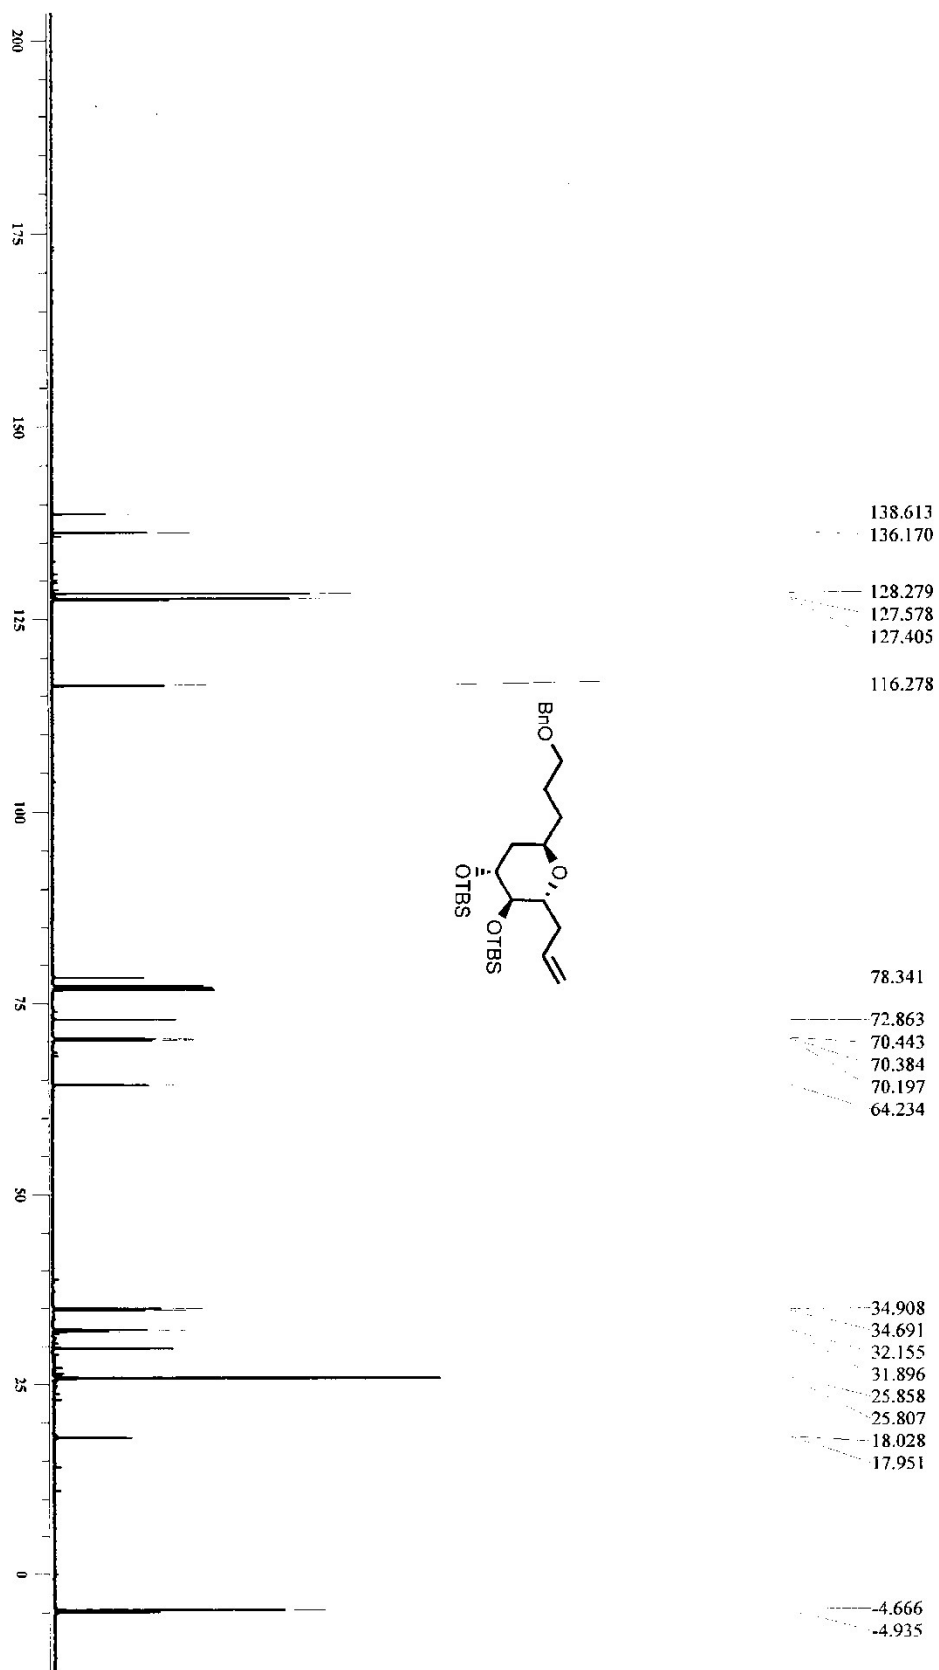

**<sup>13</sup>C NMR of 2h (75 MHz, CDCl<sub>3</sub>)**

Sample Code : BKP-534  
 Data File : 061015...3.lcd  
 Method : LC-MS Lab Method.lcm  
 Injection Volume : 20  
 Date Acquired : 10/6/2015 7:31:06 PM  
 Report File : LC-MS Data Report.lsr  
 Chromatographic Conditions : Column: Atlantis C18 (150 X 4.6mm, 5.0 u)  
 Mobile Phase: 95% ACN in 0.1% FA, 1.0 mL/min

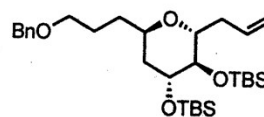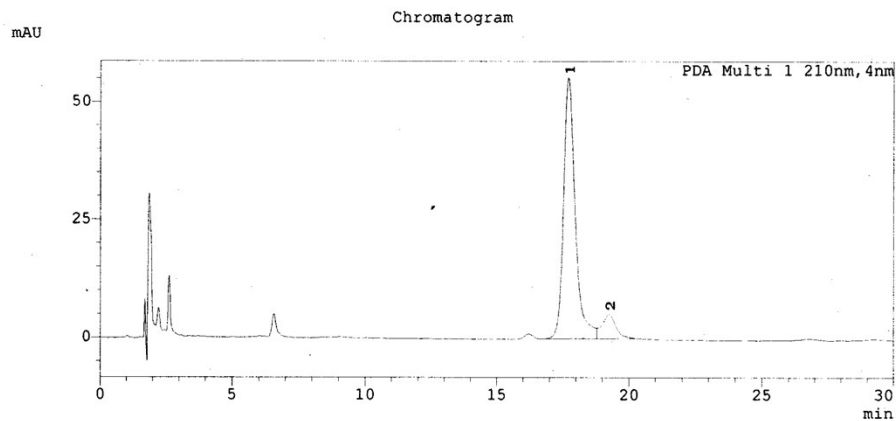

Peak Table

| Peak# | Ret. Time | Peak Start | Peak End | Area    | Area%   |
|-------|-----------|------------|----------|---------|---------|
| 1     | 17.706    | 16.821     | 18.795   | 1703390 | 90.202  |
| 2     | 19.256    | 18.795     | 20.267   | 185026  | 9.798   |
| Total |           |            |          | 1888416 | 100.000 |

Q1 Scan Positive+  
 \$If\$(SpPrTab==SpPrTab) Spectrum Mode:Averaged 17.300-18.288 (6921-7316)  
 BG Mode:Averaged 5.195-17.235 (2079-6895)

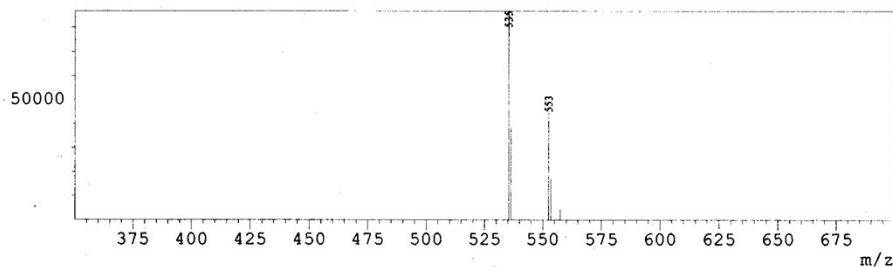

Q1 Scan Positive+  
 \$If\$(SpPrTab==SpPrTab) Spectrum Mode:Averaged 18.945-19.470 (7579-7789)  
 BG Mode:Averaged 19.470-33.090 (7789-13237)

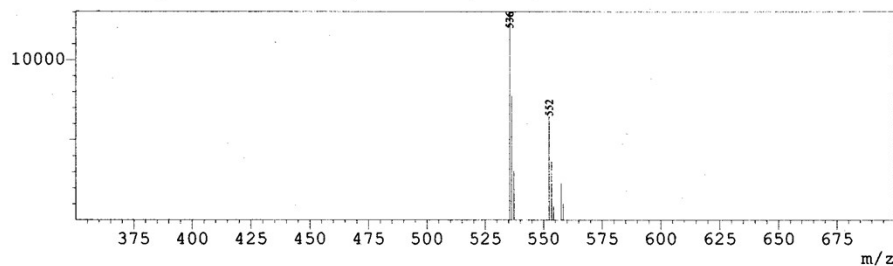

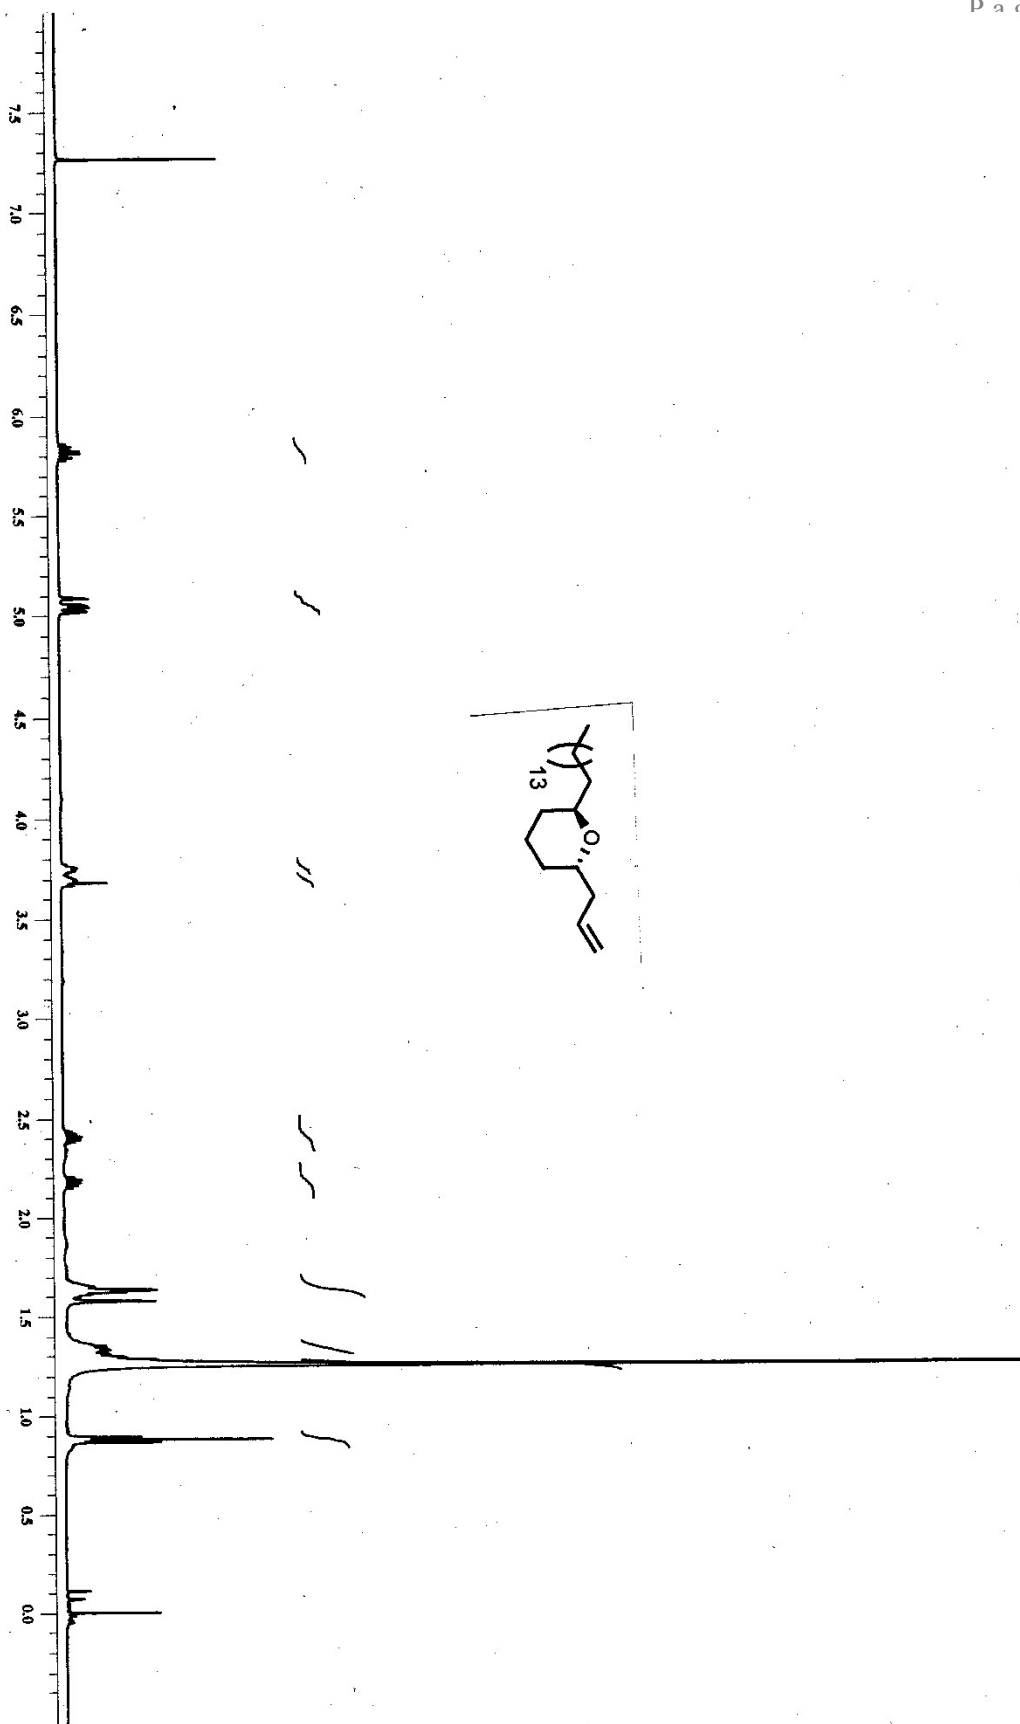 $^1\text{H}$  NMR of 2i (300 MHz,  $\text{CDCl}_3$ )

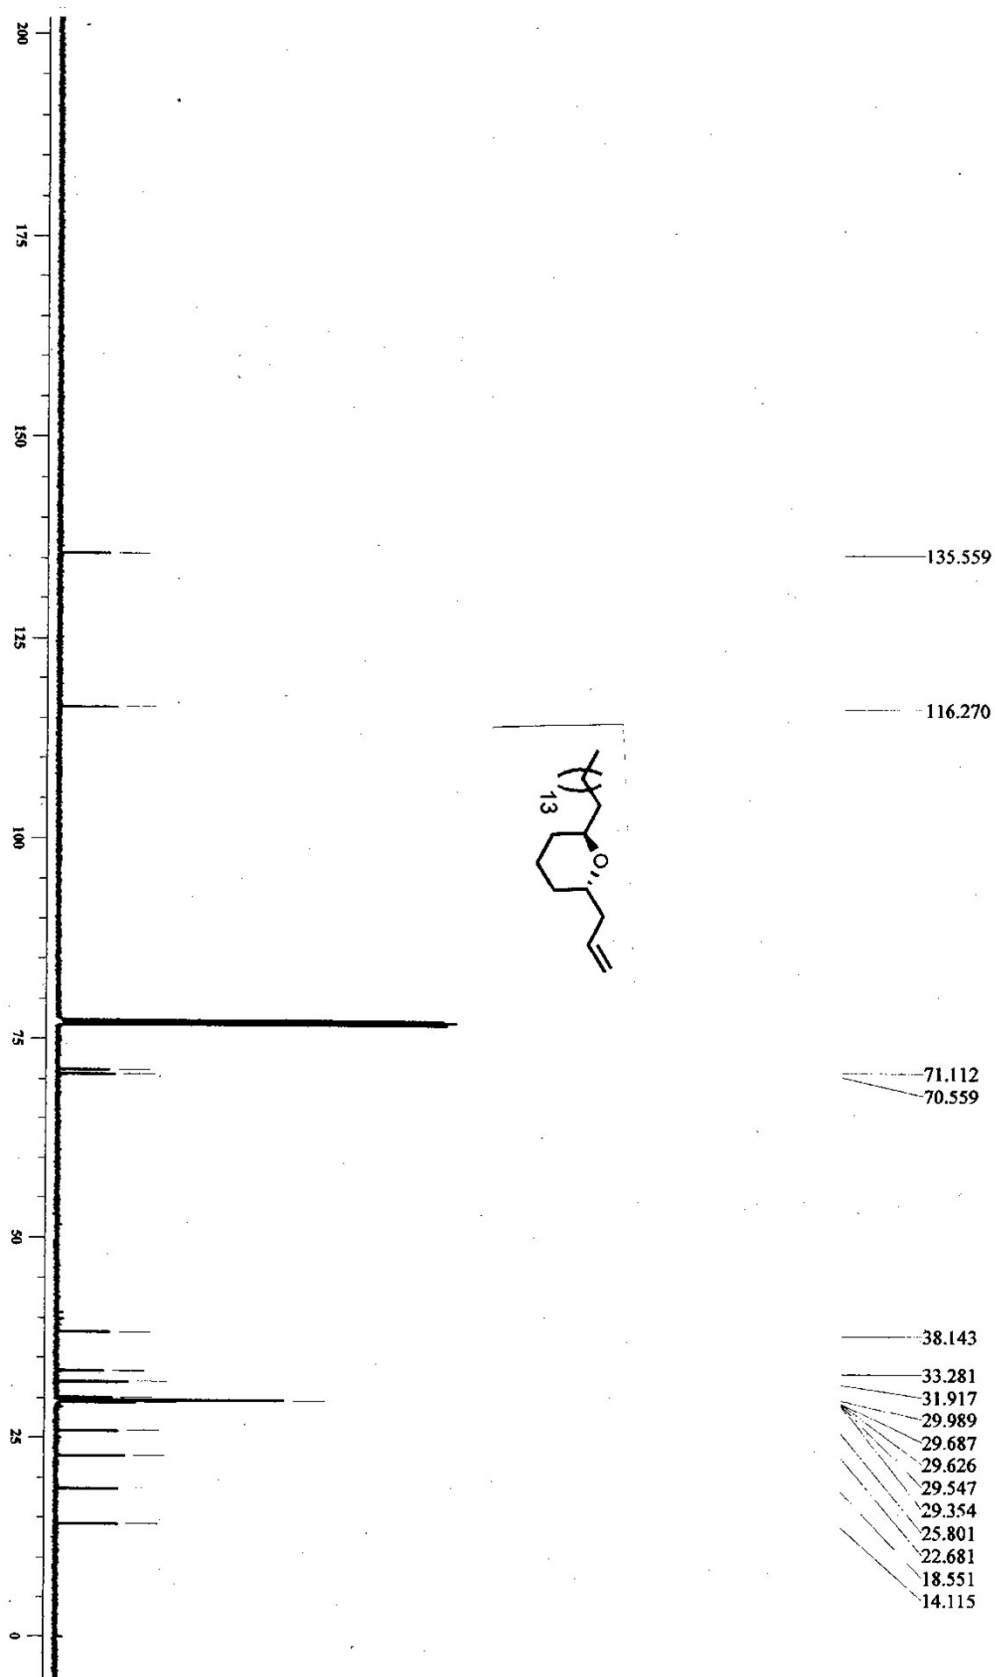

**<sup>13</sup>C NMR of 2i (75 MHz, CDCl<sub>3</sub>)**



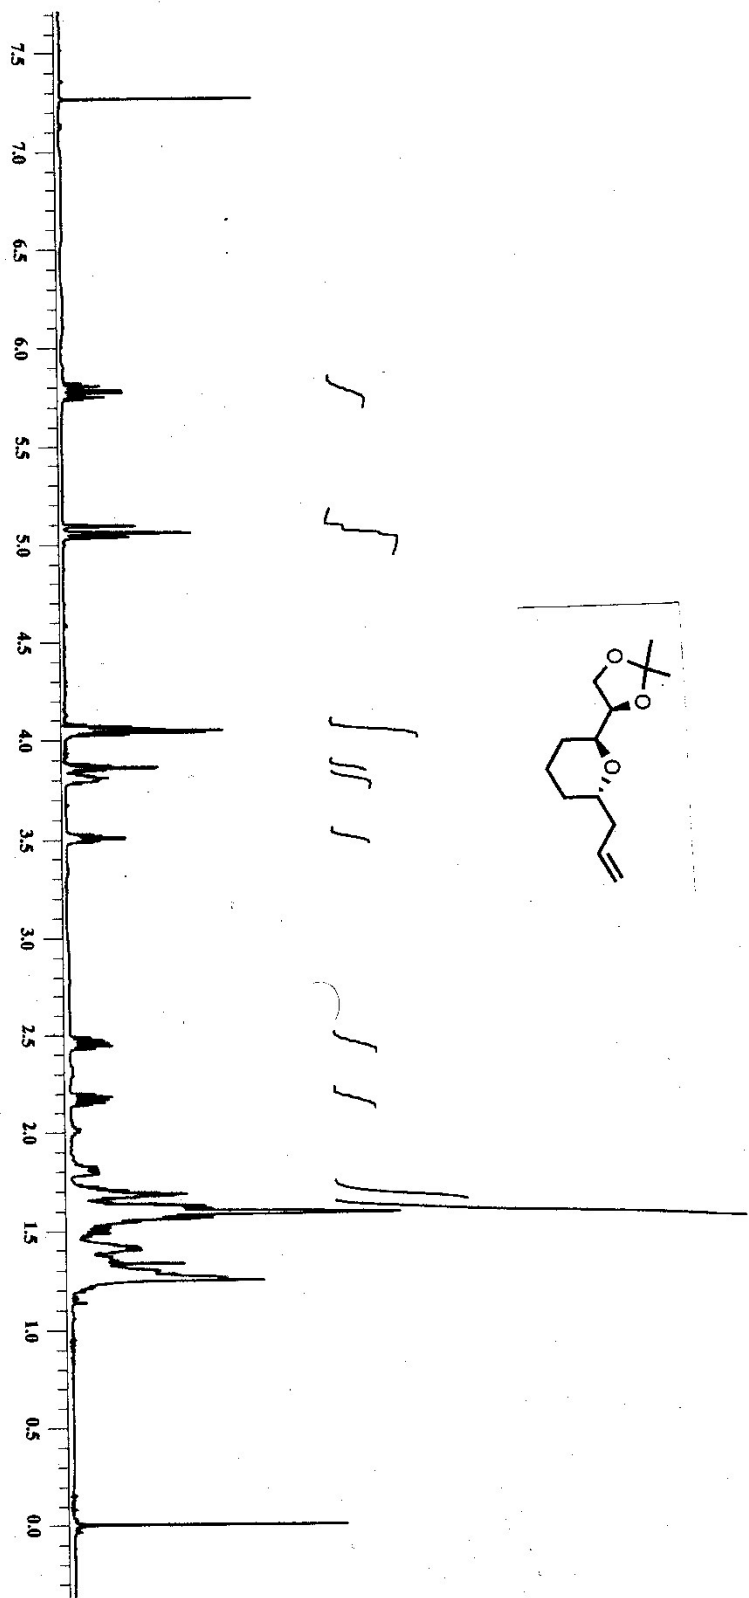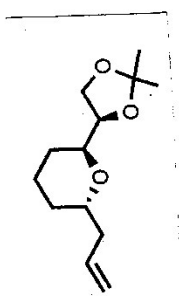

$^1\text{H}$  NMR of 2j (300 MHz,  $\text{CDCl}_3$ )

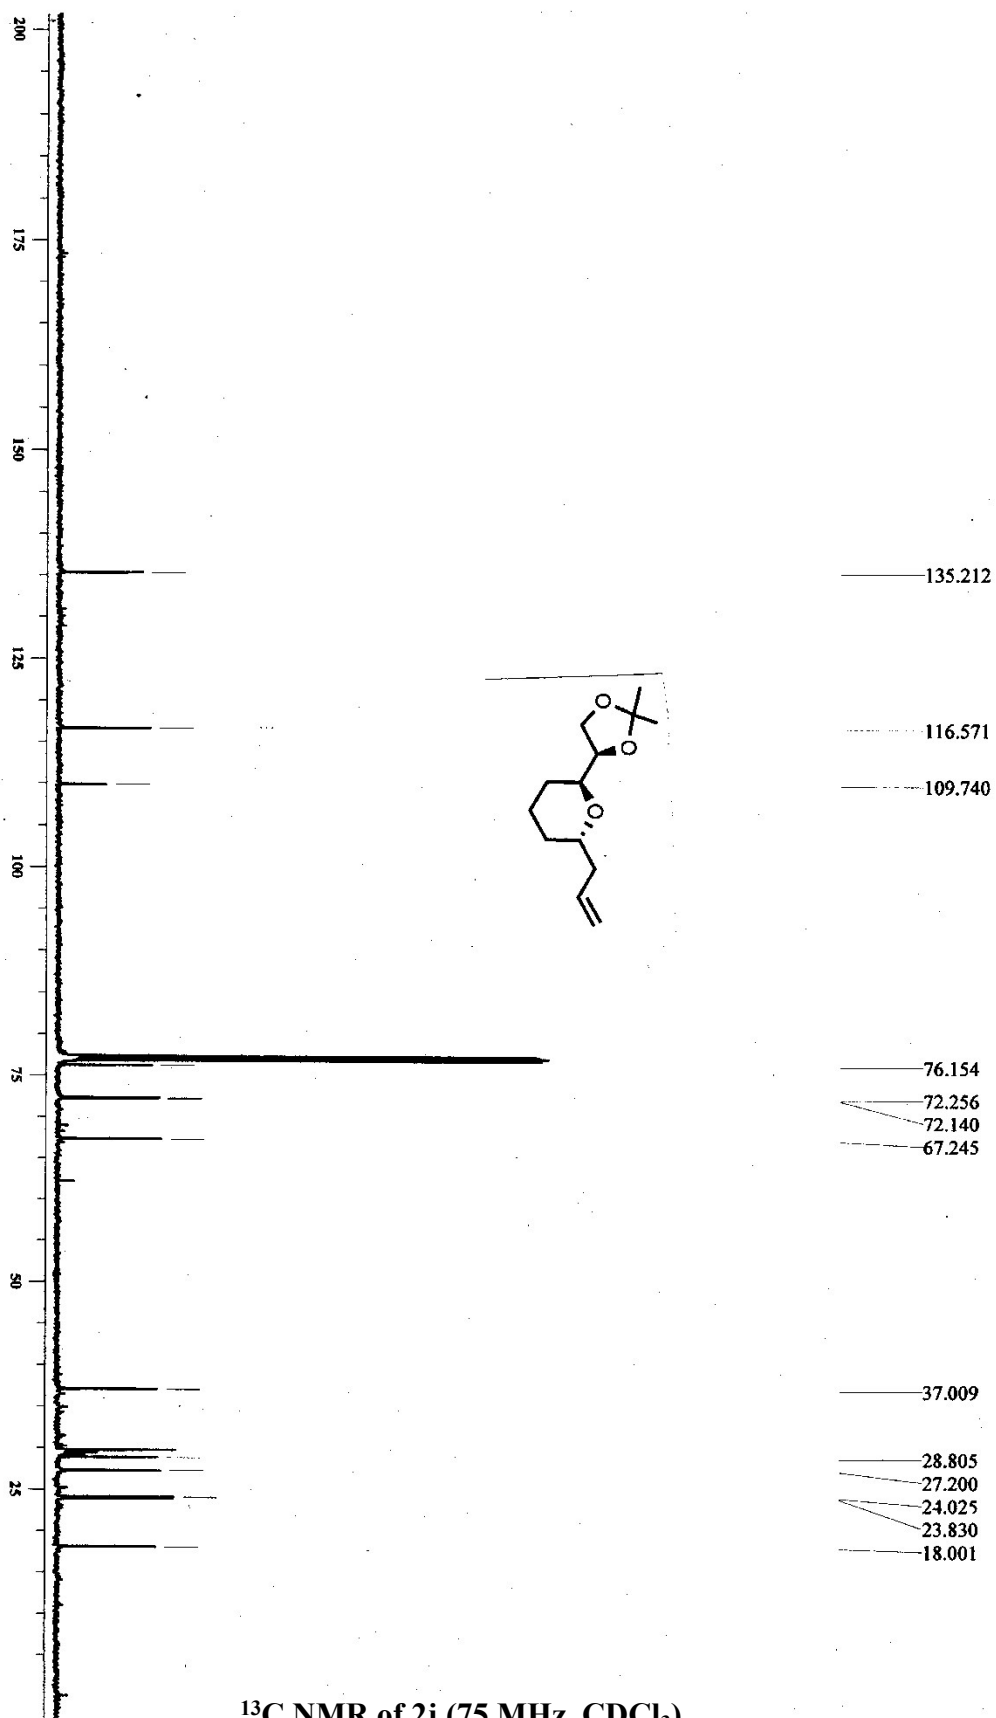

<sup>13</sup>C NMR of 2j (75 MHz, CDCl<sub>3</sub>)

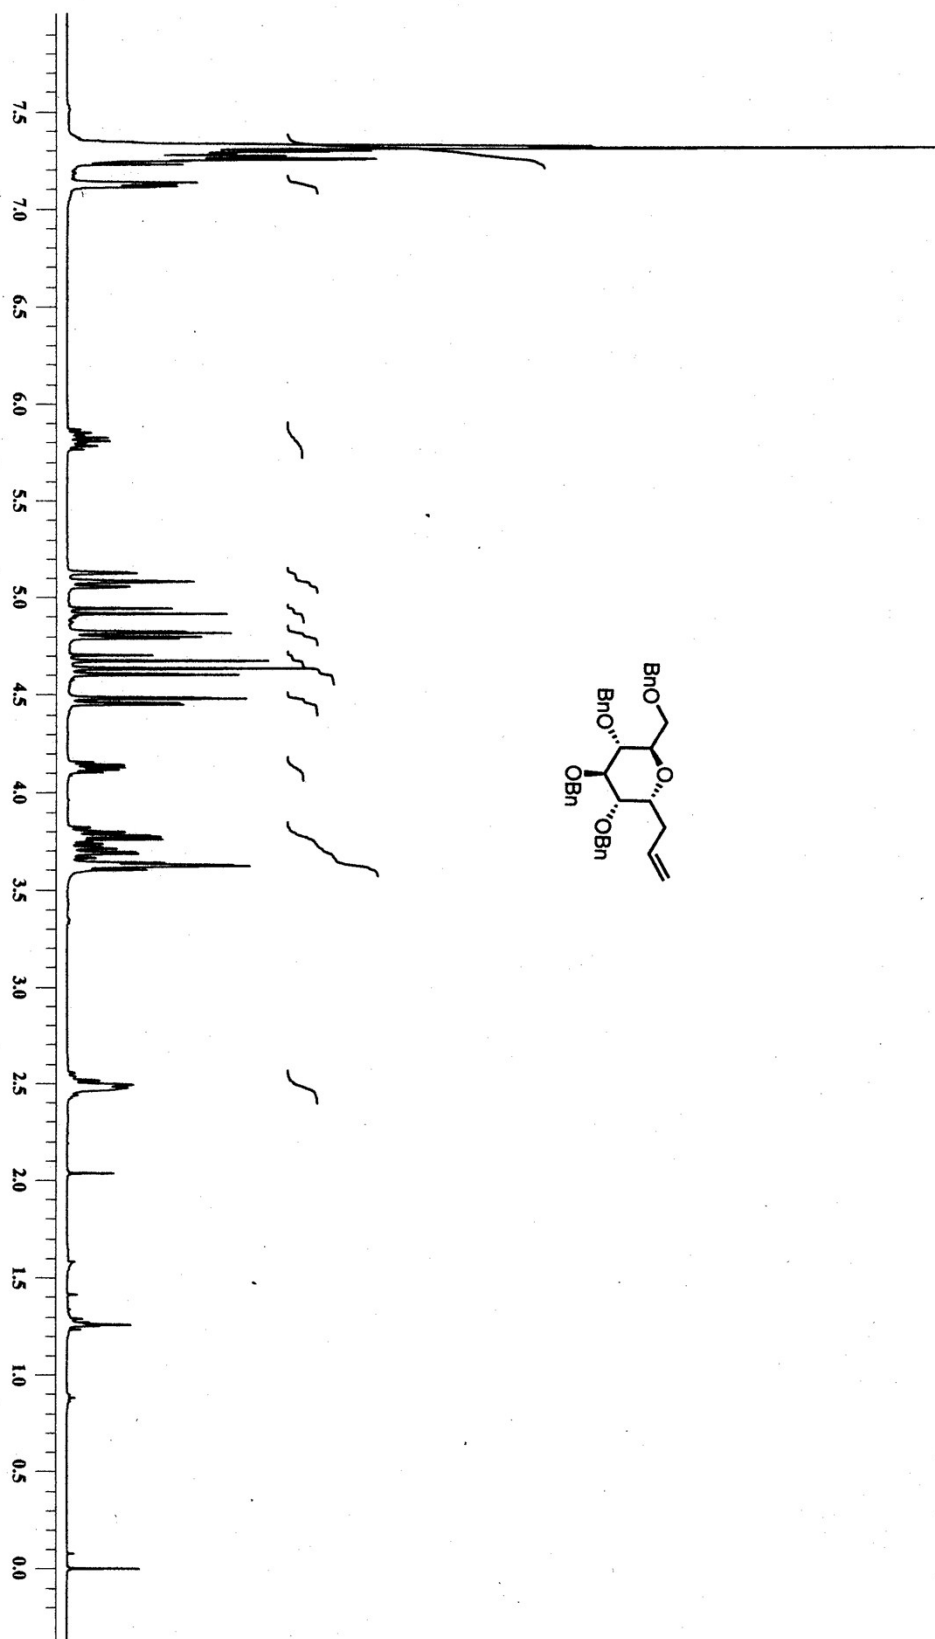

$^1\text{H}$  NMR of 2k (400 MHz,  $\text{CDCl}_3$ )

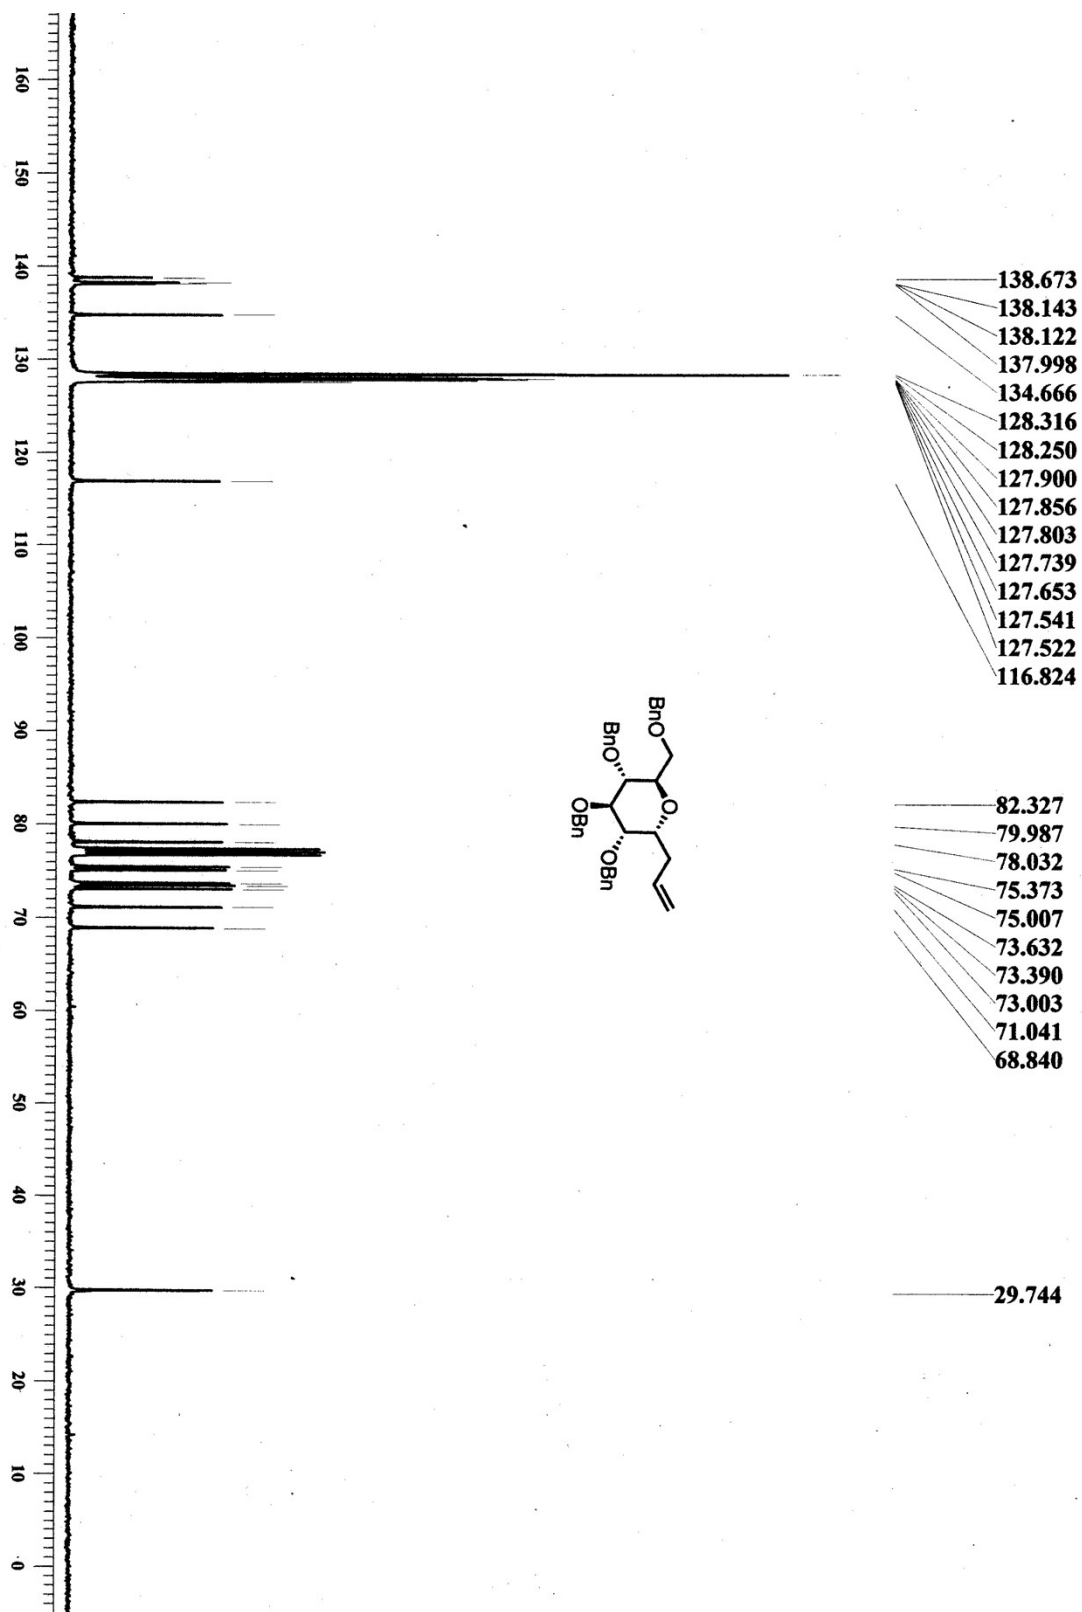

<sup>13</sup>C NMR of 2k (100 MHz, CDCl<sub>3</sub>)

Sample Code : BKP-564  
 Data File : 061015....5.lcd  
 Method : LC-MS Lab Method.lcm  
 Injection Volume : 20  
 Date Acquired : 10/6/2015 8:52:27 PM  
 Report File : LC-MS Data Report.lsr  
 Chromatographic Conditions : Column: Atlantis C18 (150 X 4.6mm, 5.0 u)  
 Mobile Phase: 95% ACN in 0.1% FA, 1.0 mL/min

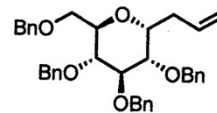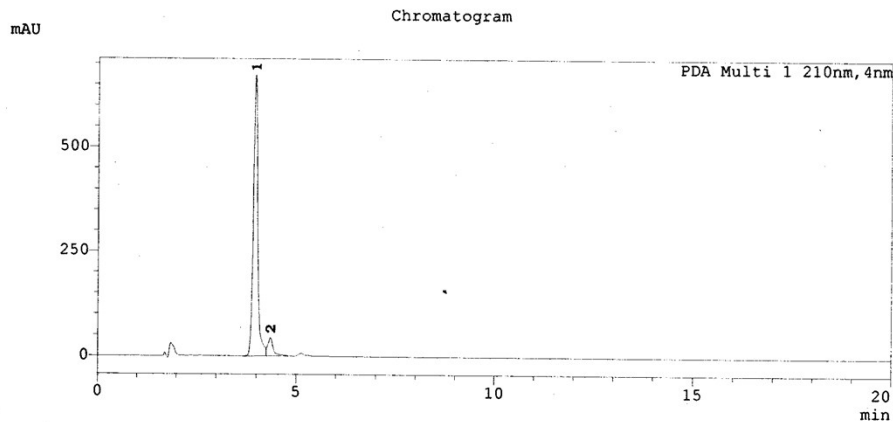

Peak Table

| Peak# | Ret. Time | Peak Start | Peak End | Area    | Area%   |
|-------|-----------|------------|----------|---------|---------|
| 1     | 3.963     | 3.659      | 4.245    | 5197973 | 92.271  |
| 2     | 4.356     | 4.245      | 4.917    | 435425  | 7.729   |
| Total |           |            |          | 5633398 | 100.000 |

Q1 Scan Positive+  
 \$If\$(SpPrTab==SpPrTab) Spectrum Mode:Averaged 3.828-4.105 (1532-1643)  
 BG Mode:Averaged 1.873-3.810 (750-1525)

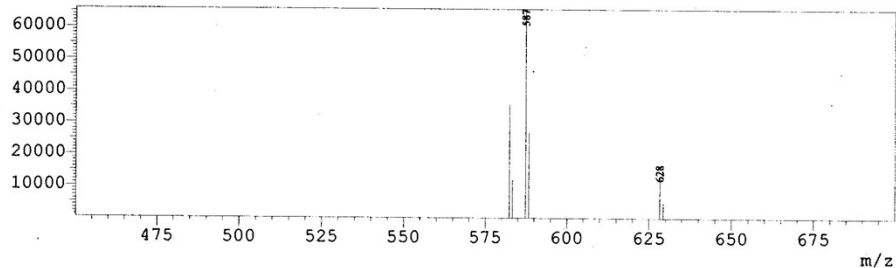

Q1 Scan Positive+  
 \$If\$(SpPrTab==SpPrTab) Spectrum Mode:Averaged 4.193-4.418 (1678-1768)  
 BG Mode:Averaged 1.975-4.140 (791-1657)

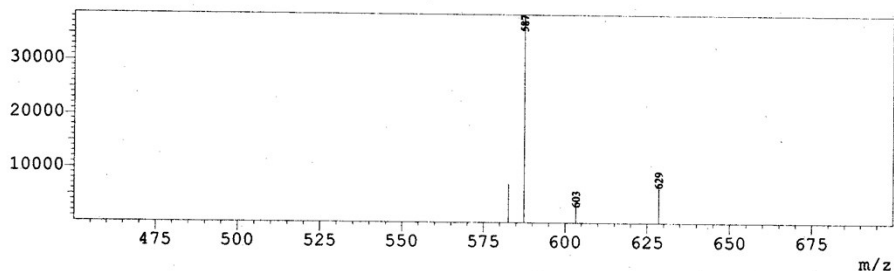

LC-MS REPORT

HPLC of compound 2k

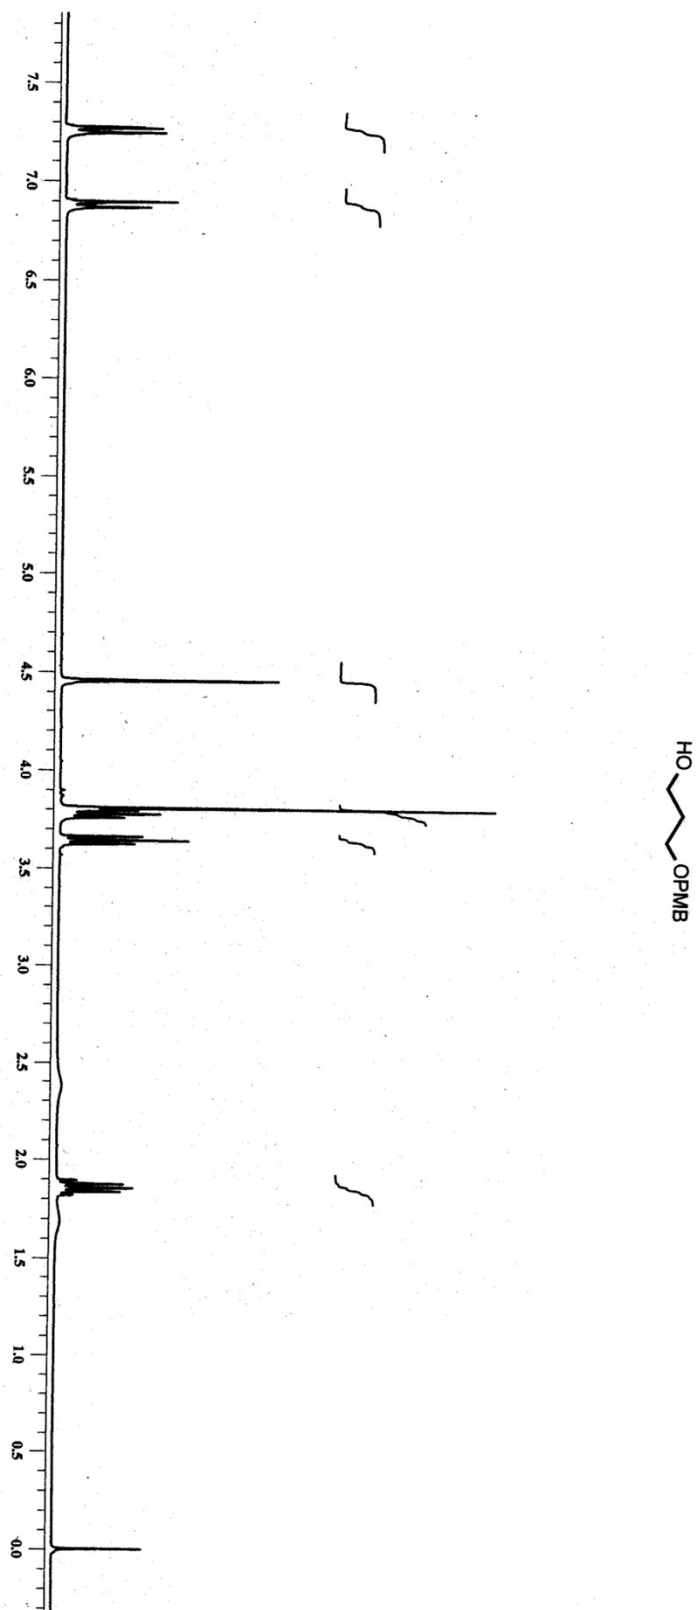

$^1\text{H}$  NMR of 9 (300 MHz,  $\text{CDCl}_3$ )

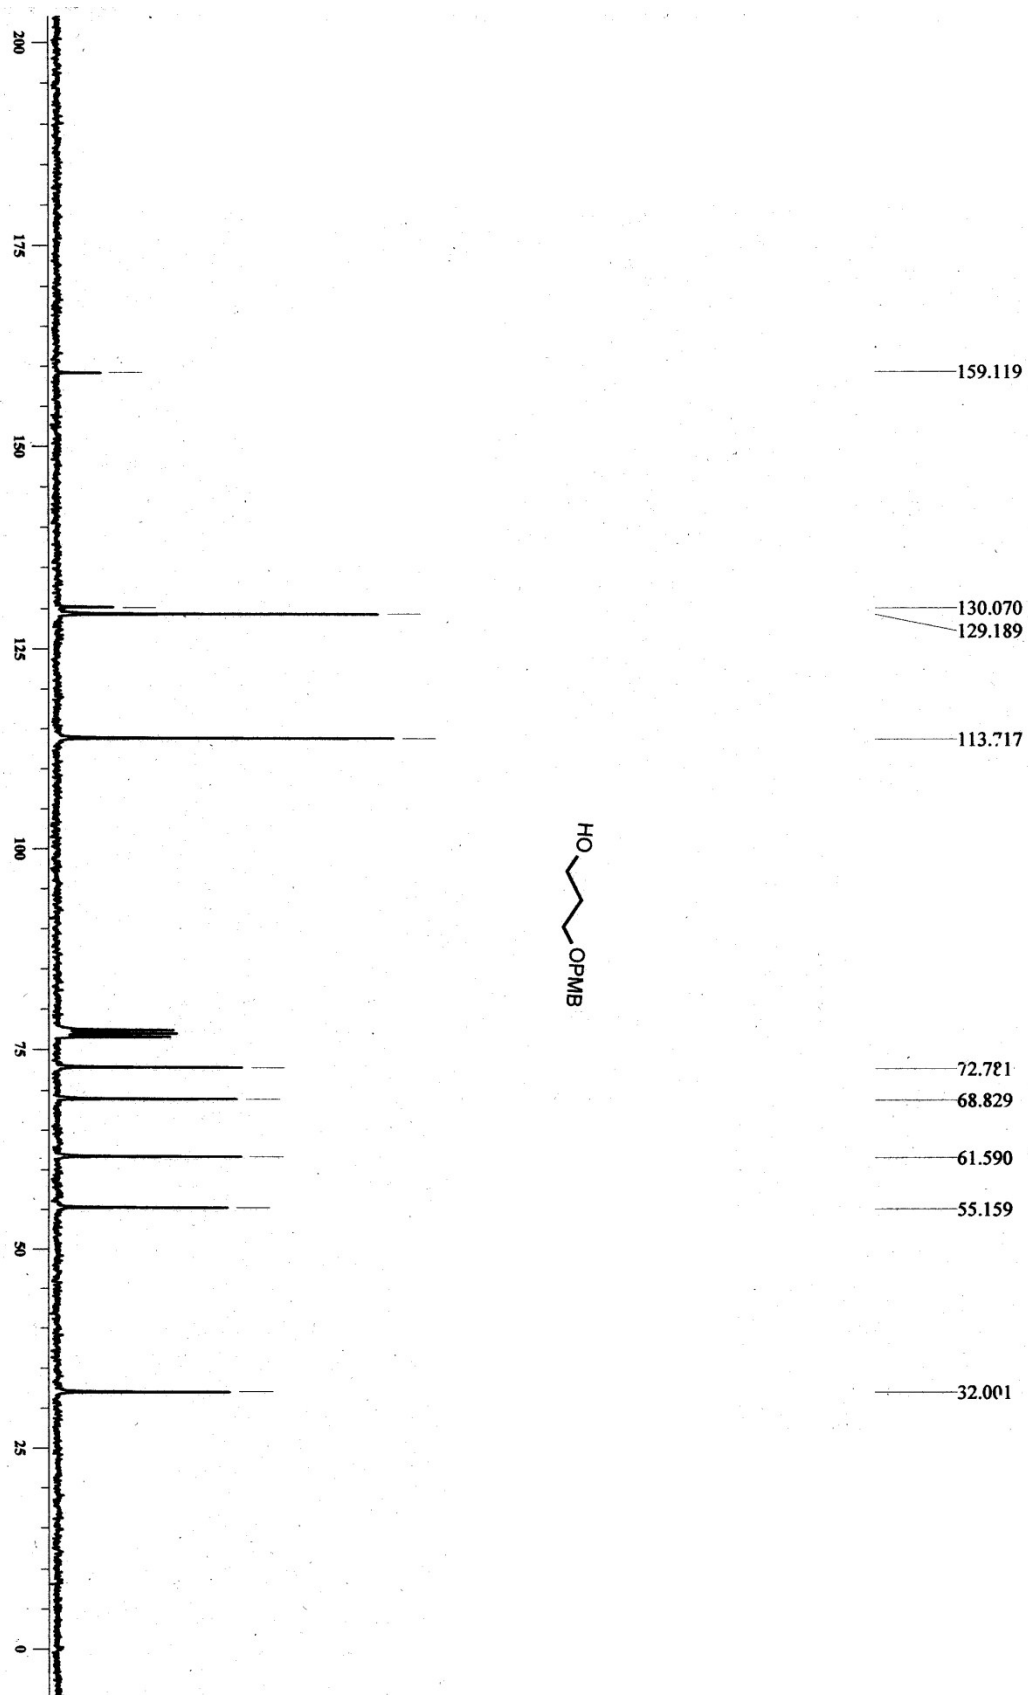

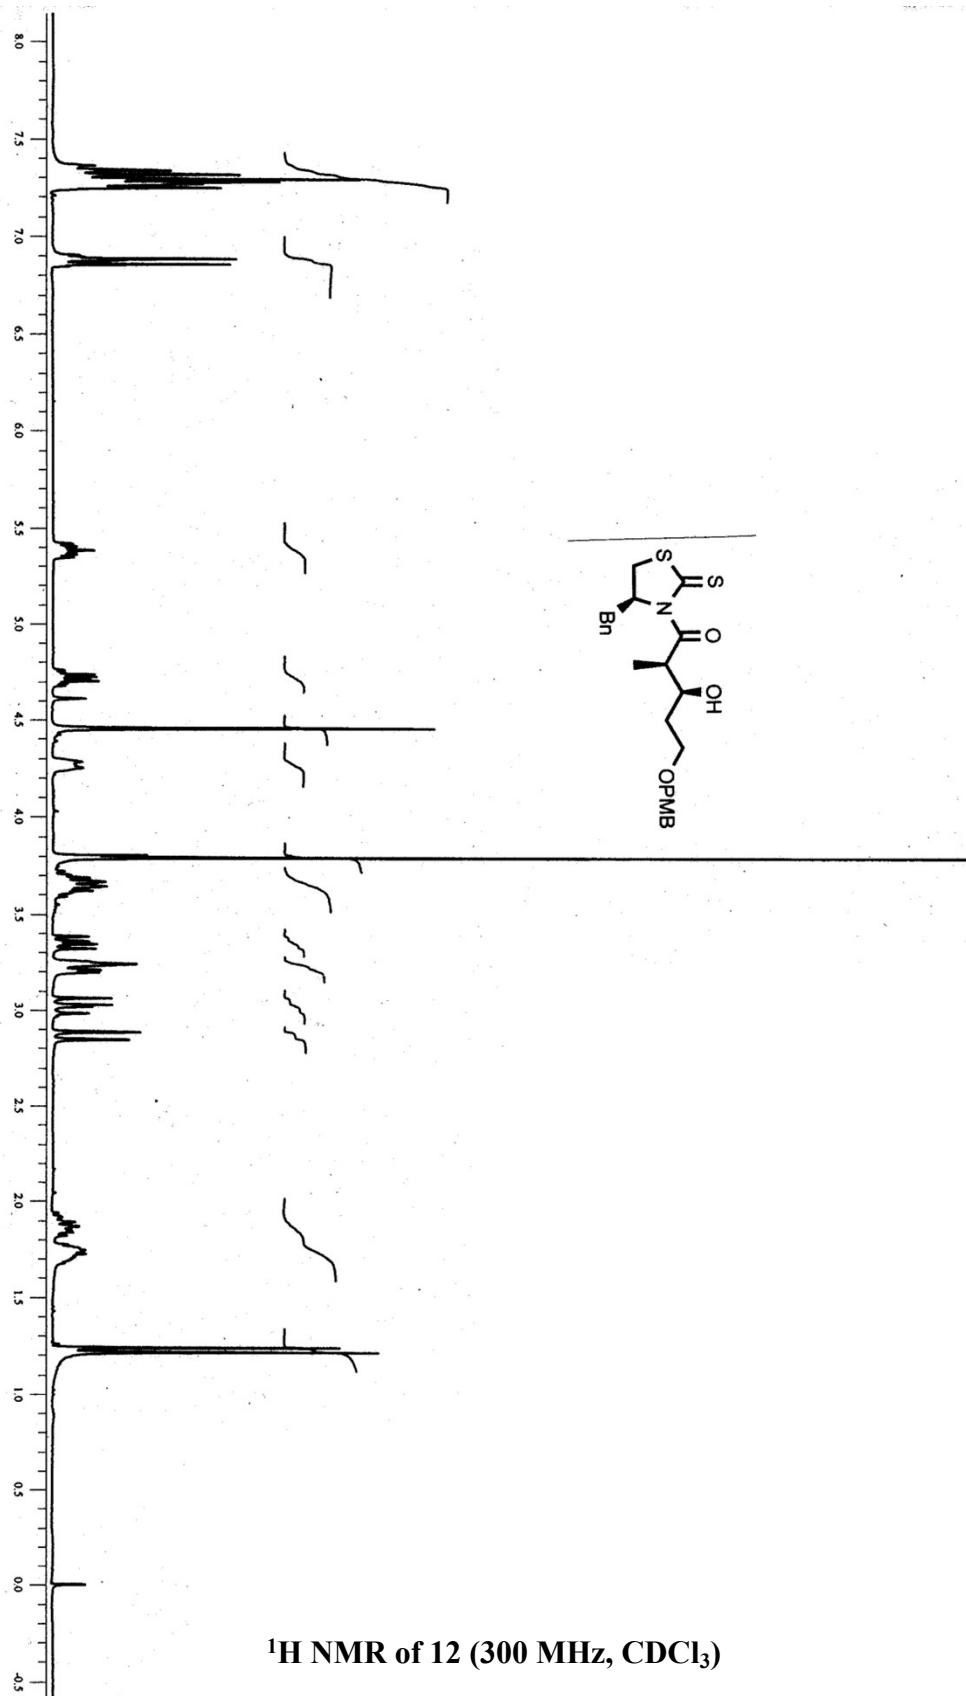



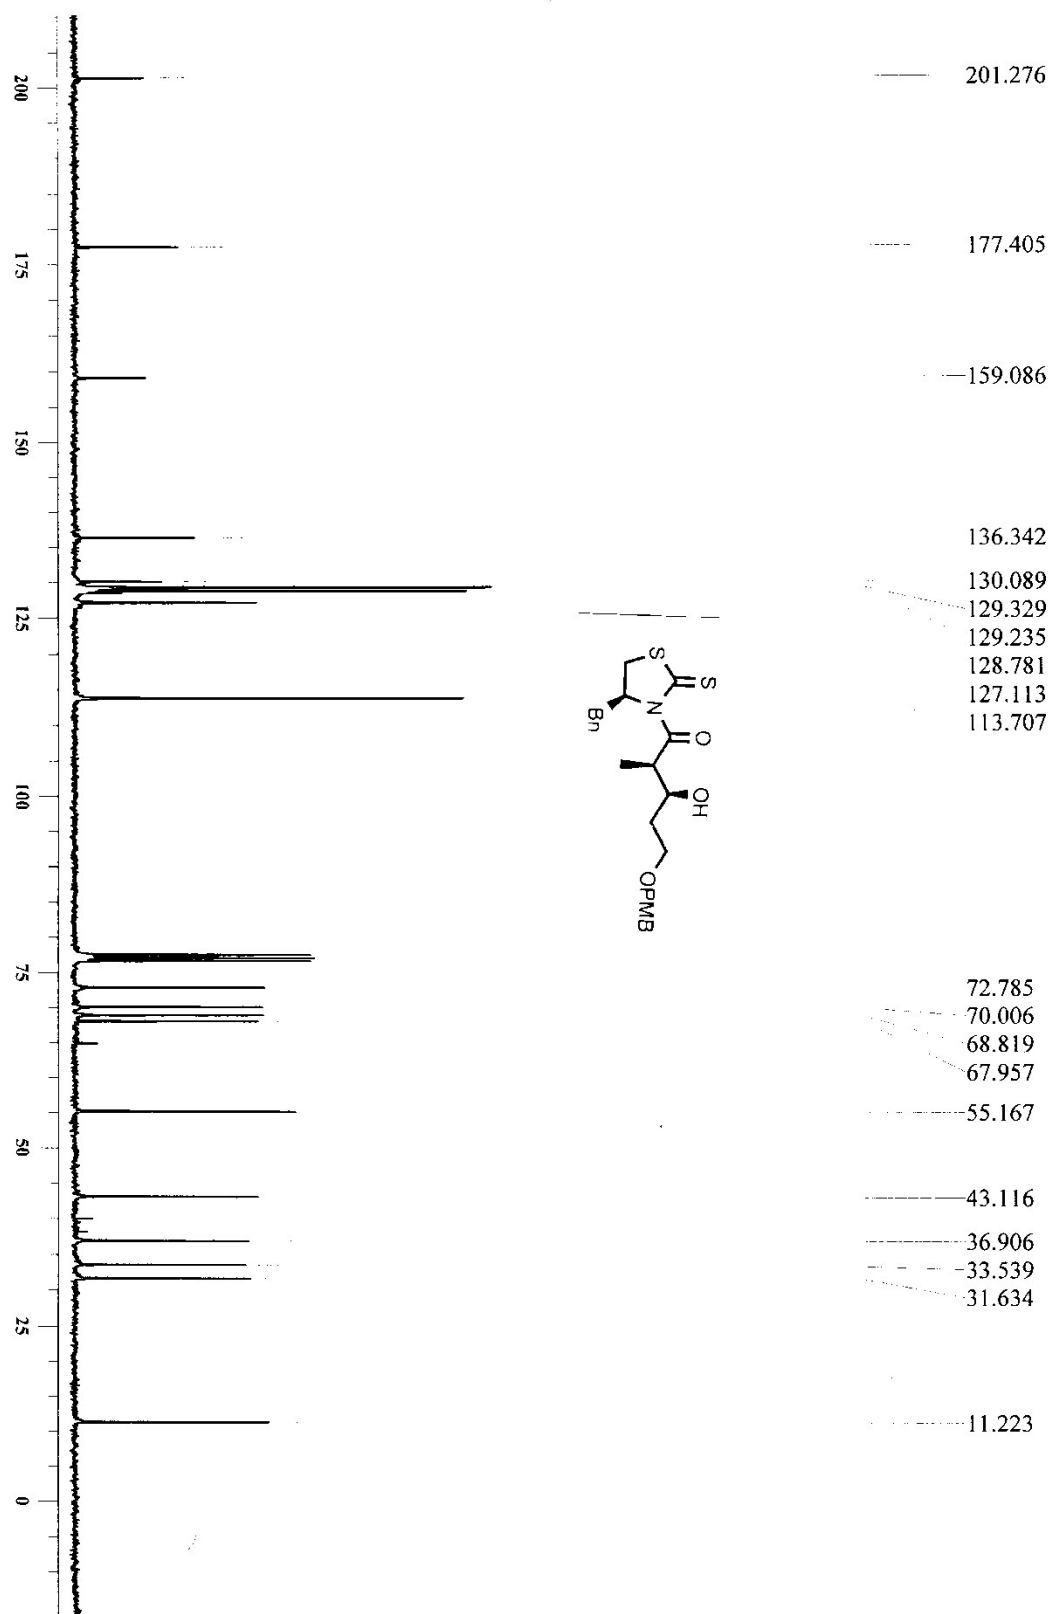

**<sup>13</sup>C NMR of 12 (75 MHz, CDCl<sub>3</sub>)**

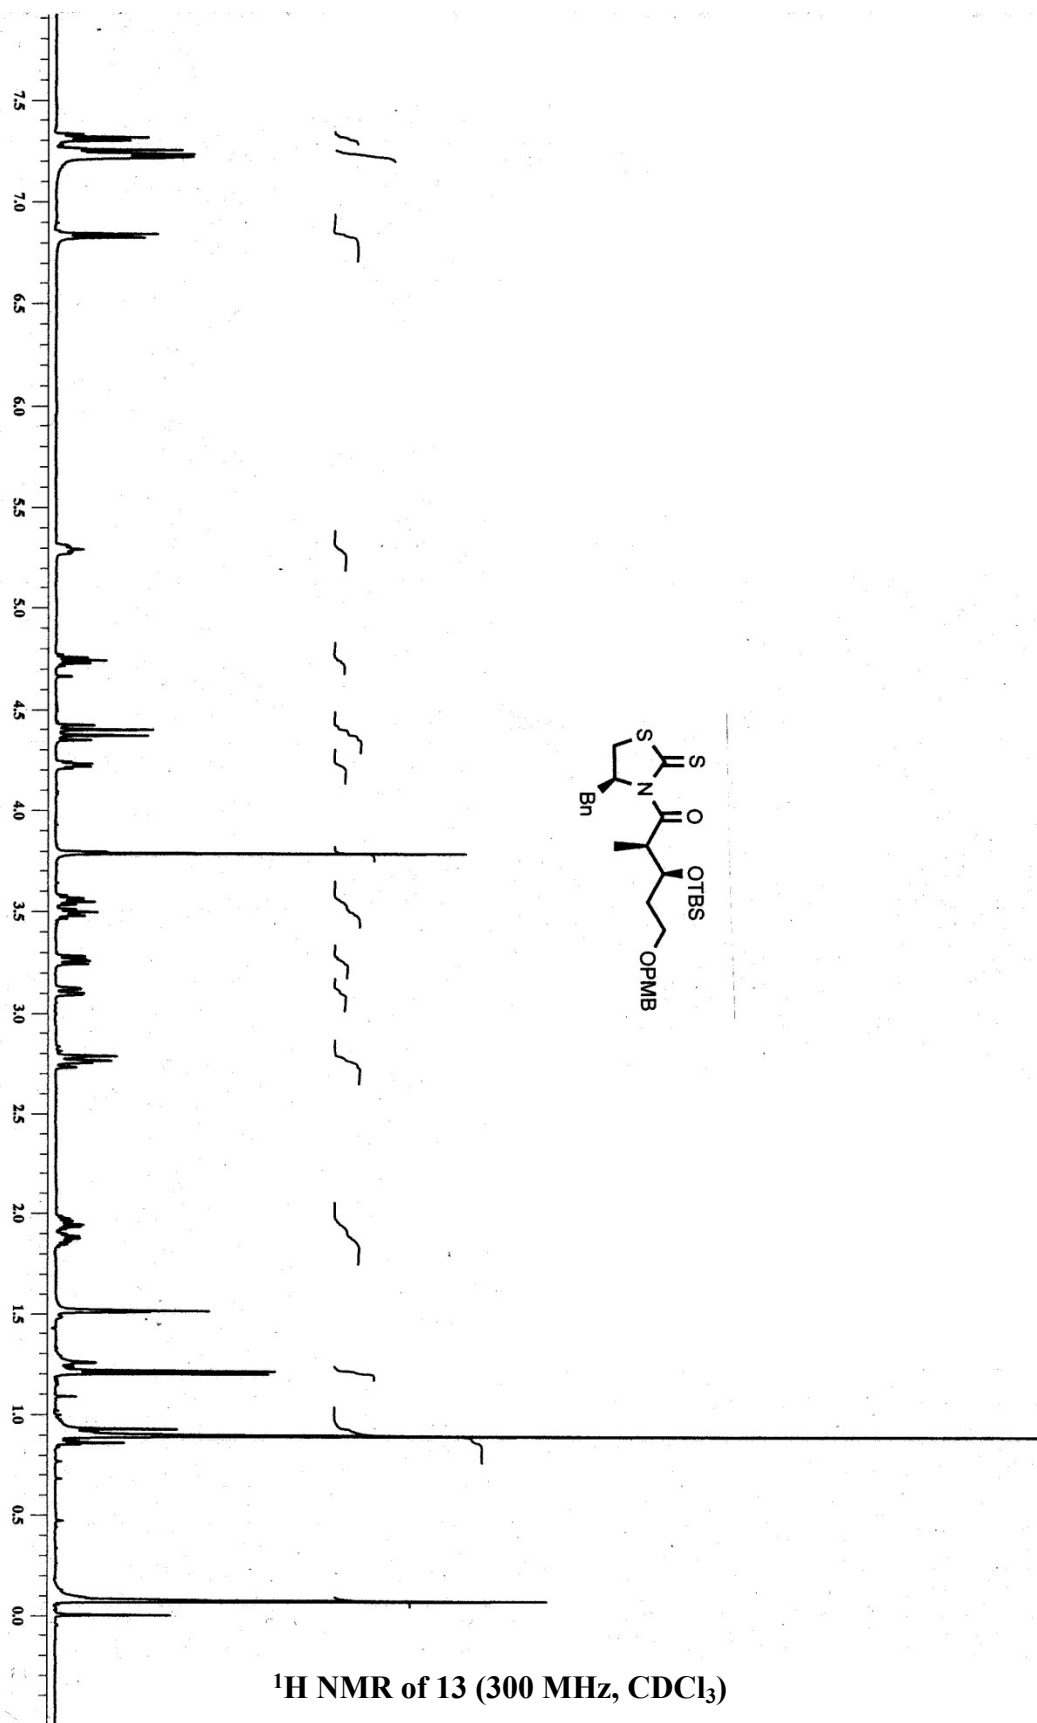

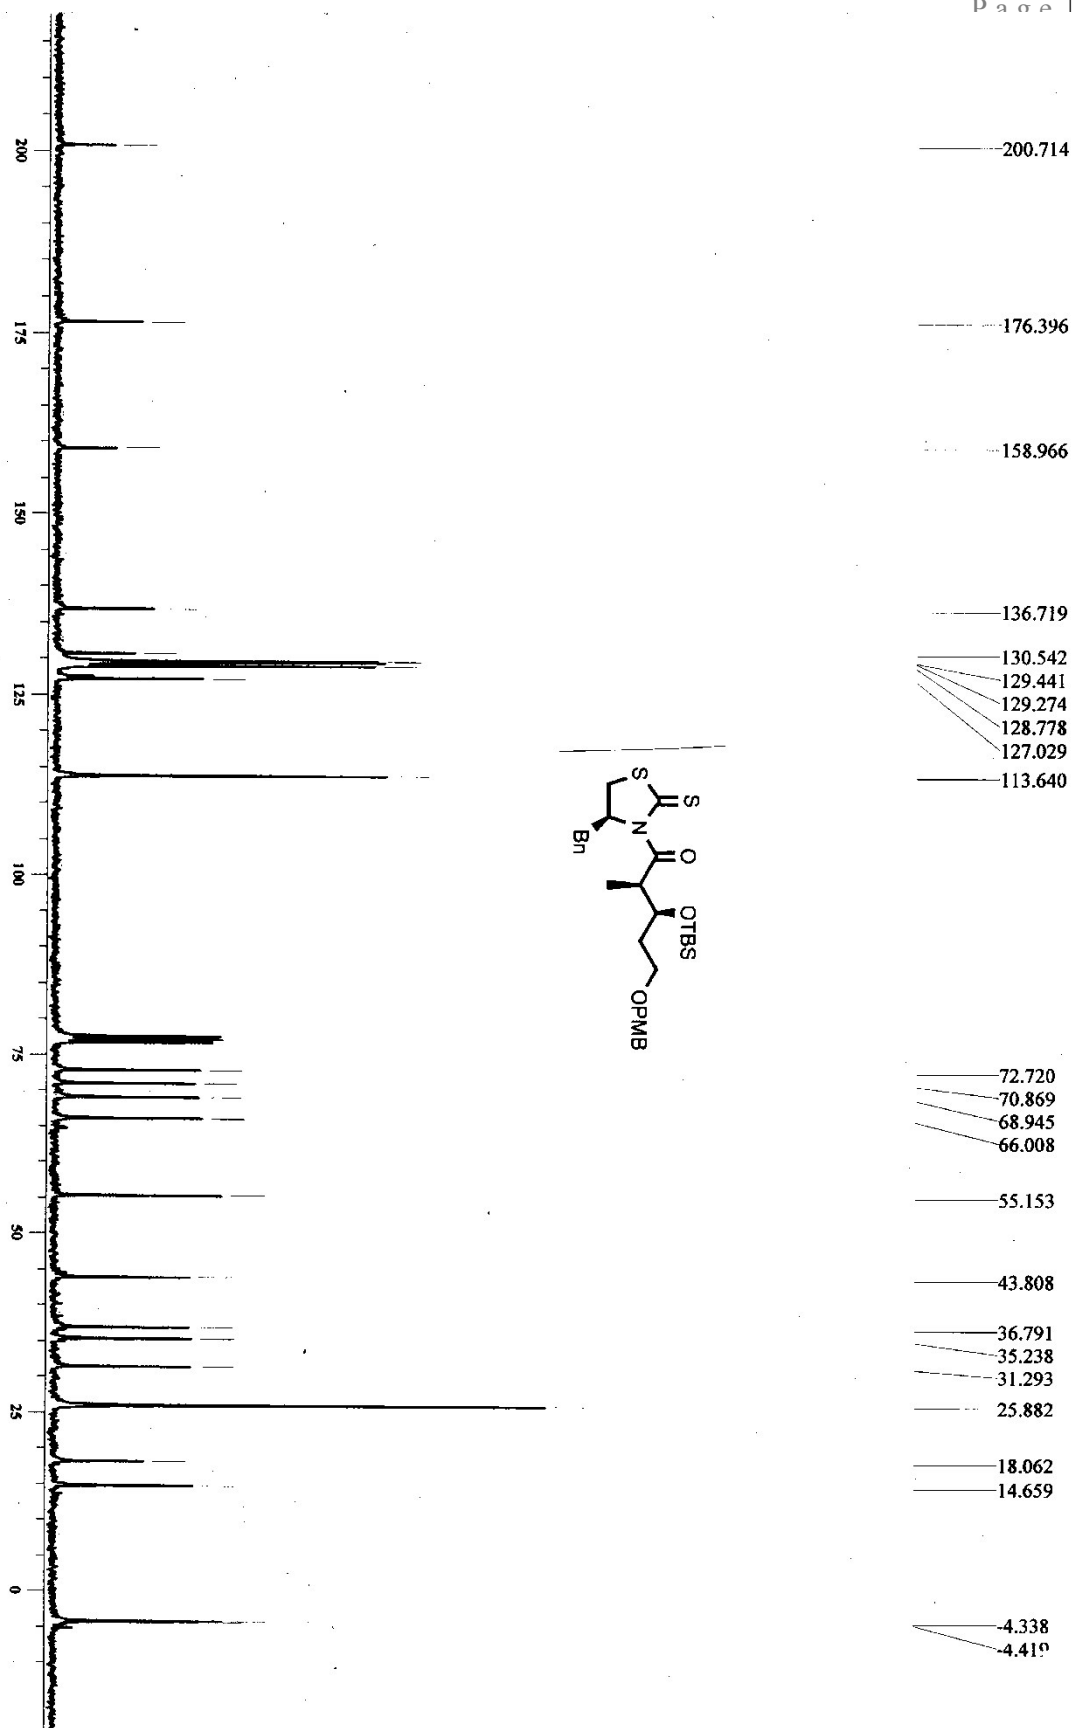 $^{13}\text{C}$  NMR of 13 (75 MHz,  $\text{CDCl}_3$ )

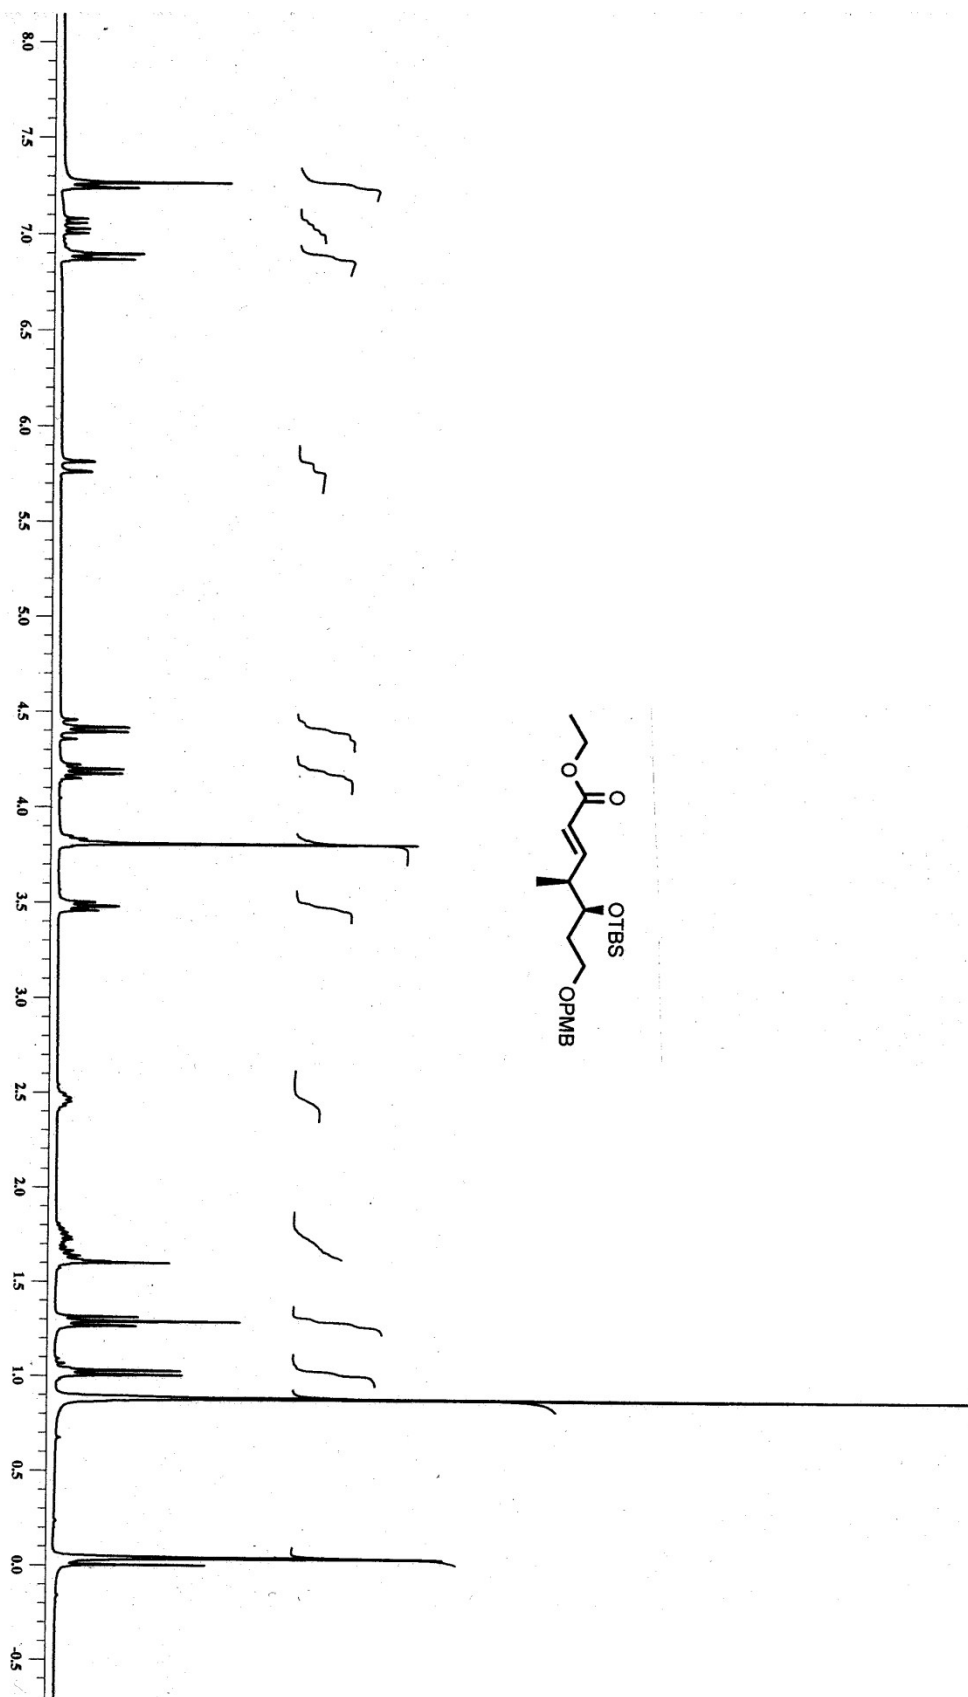 $^1\text{H}$  NMR of 14 (300 MHz,  $\text{CDCl}_3$ )

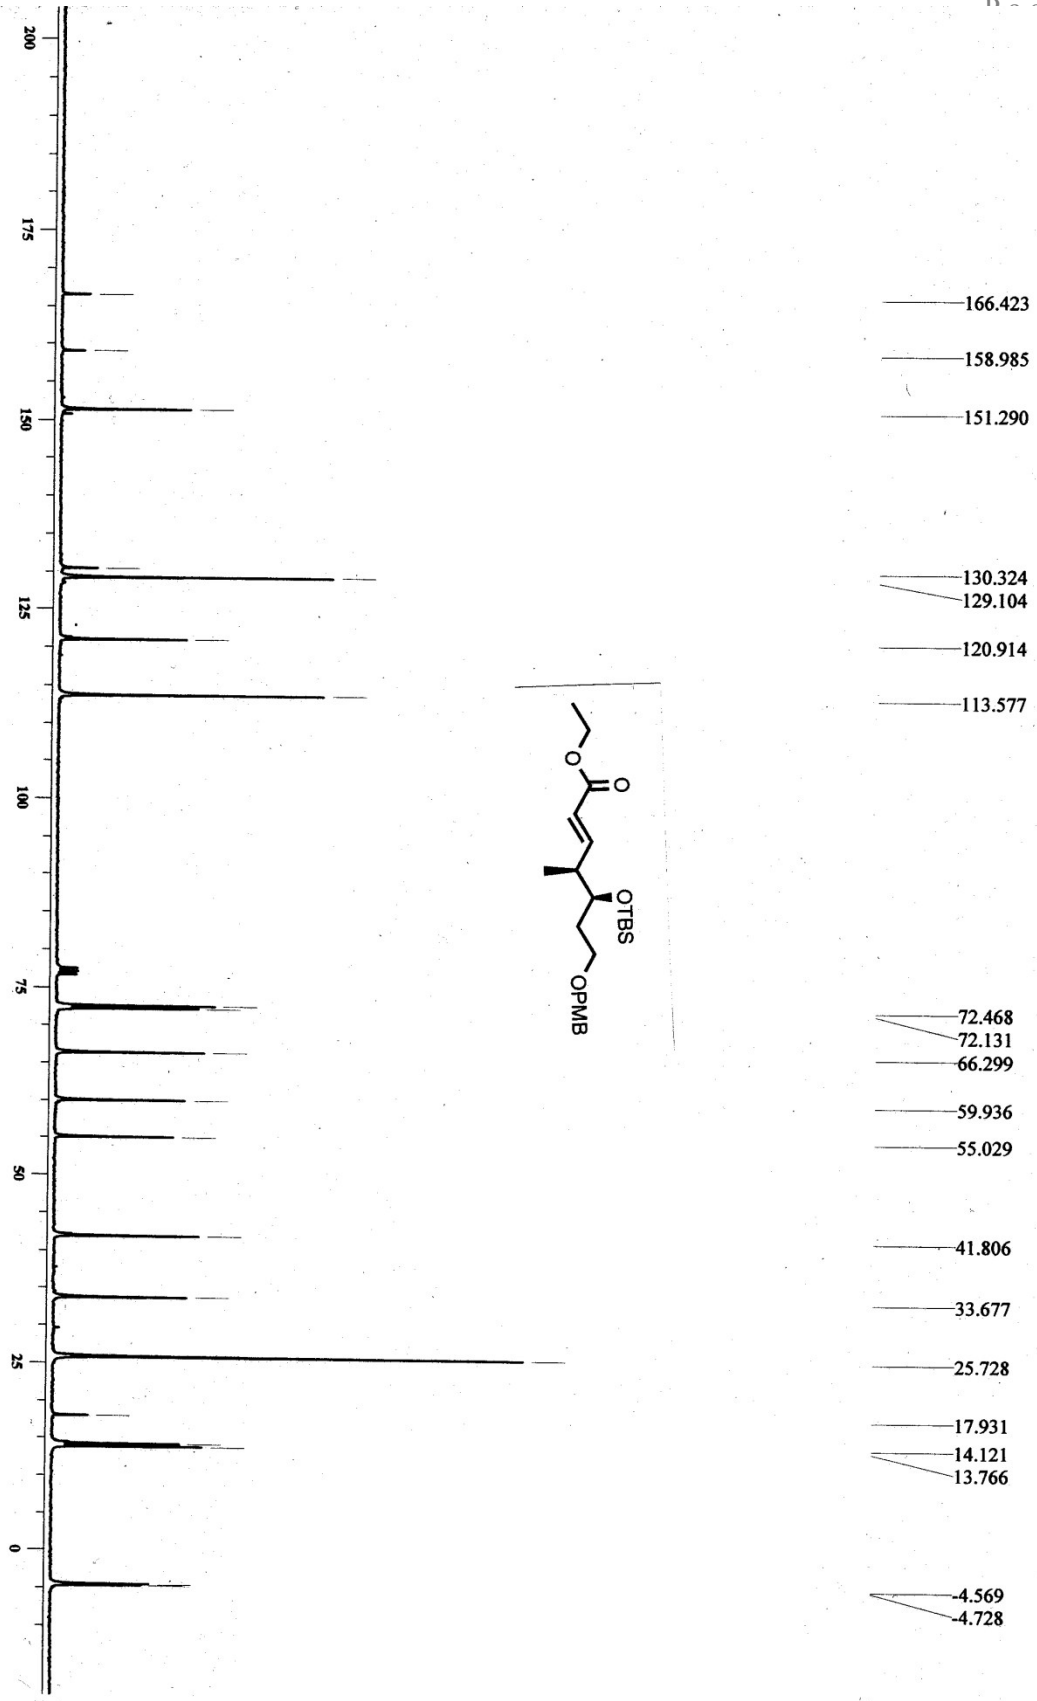

$^{13}\text{C}$  NMR of 14 (75 MHz,  $\text{CDCl}_3$ )

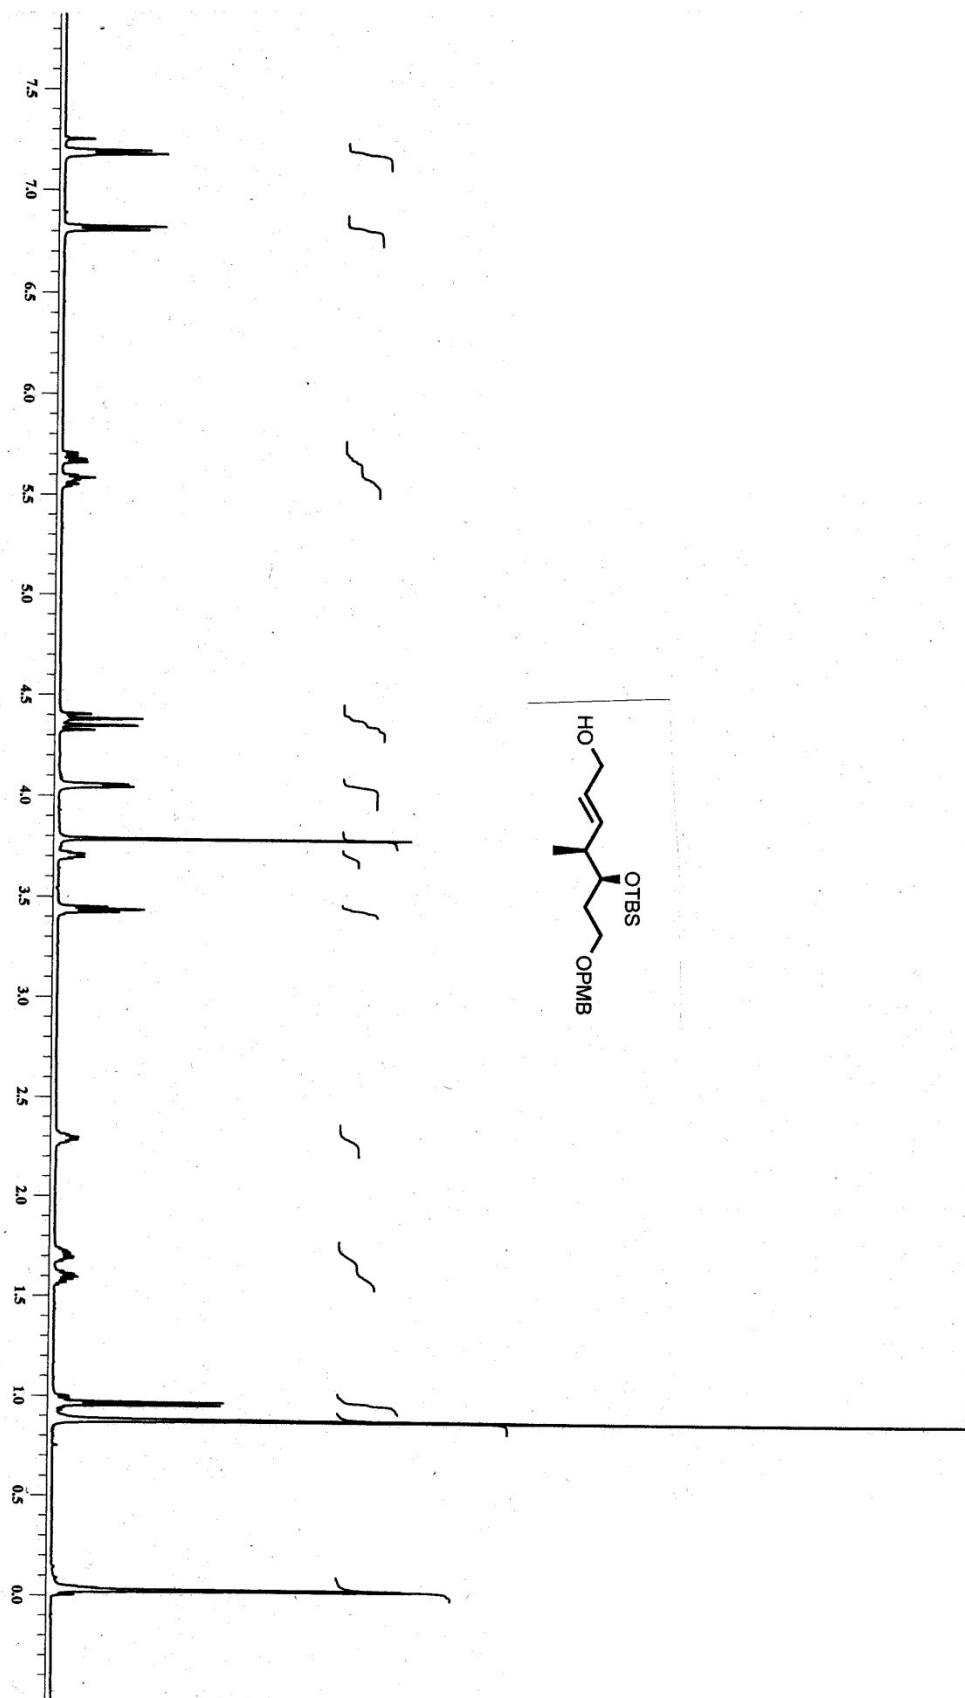 $^1\text{H}$  NMR of 15 (300 MHz,  $\text{CDCl}_3$ )

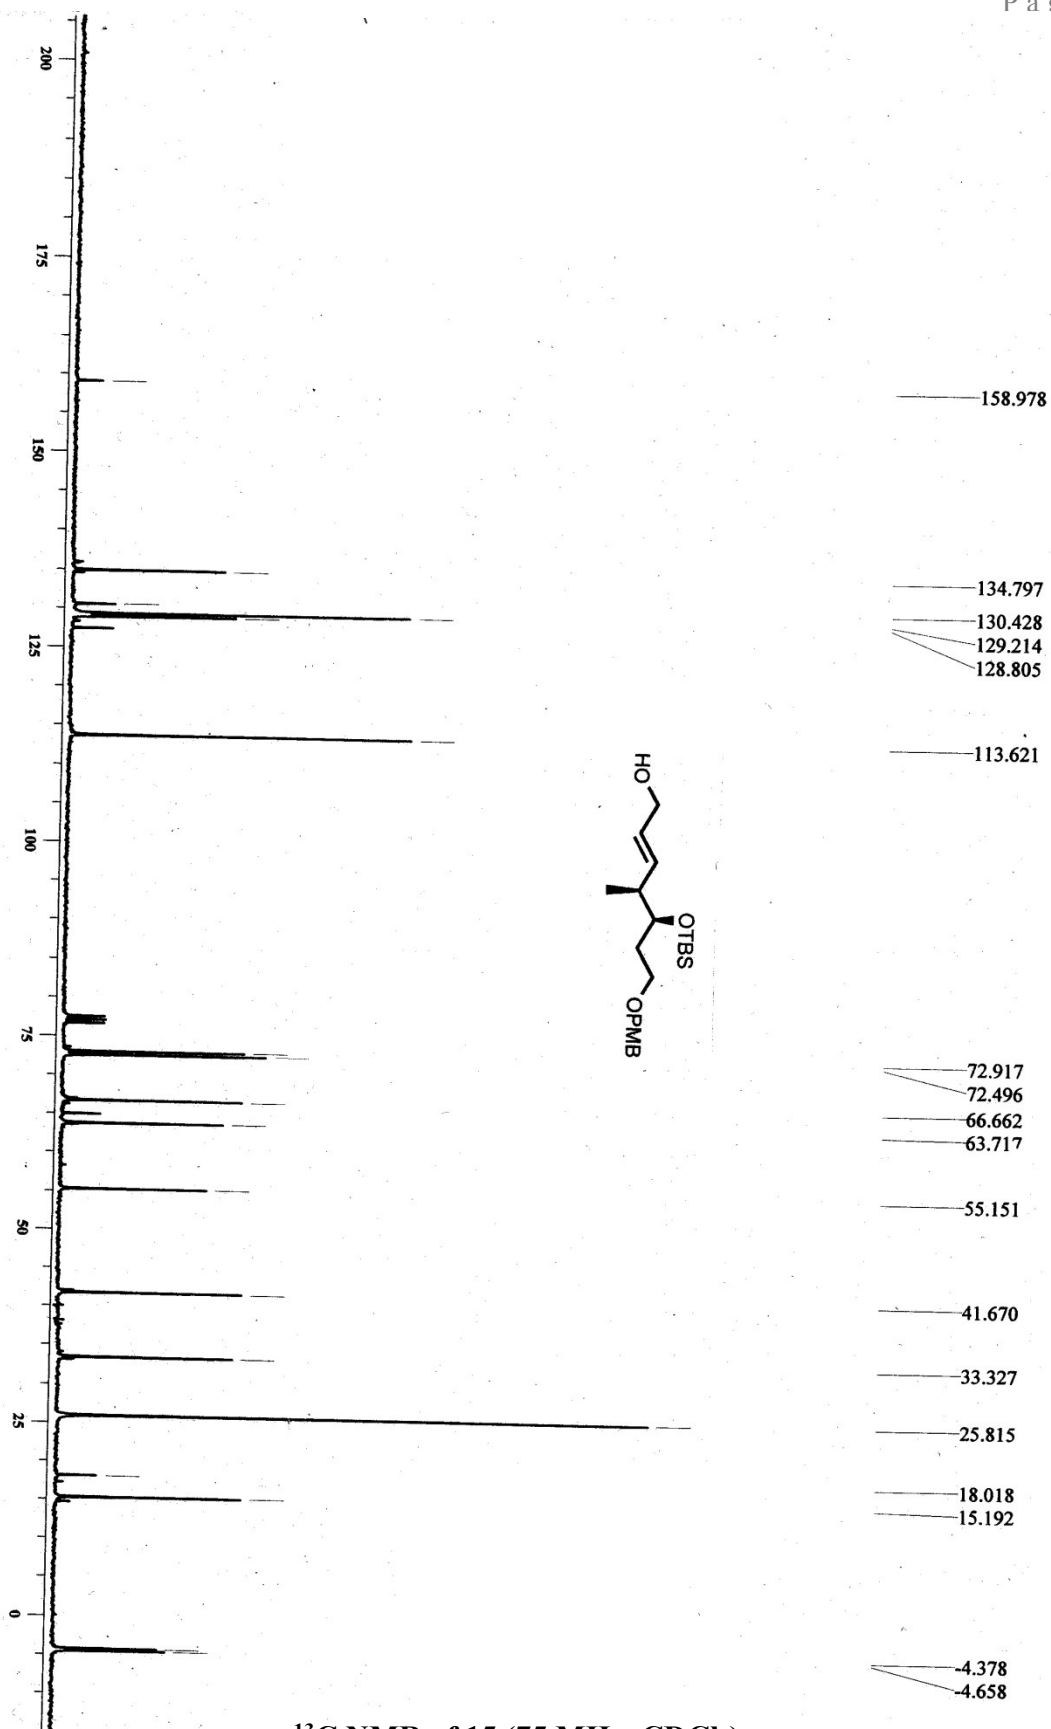<sup>13</sup>C NMR of 15 (75 MHz, CDCl<sub>3</sub>)

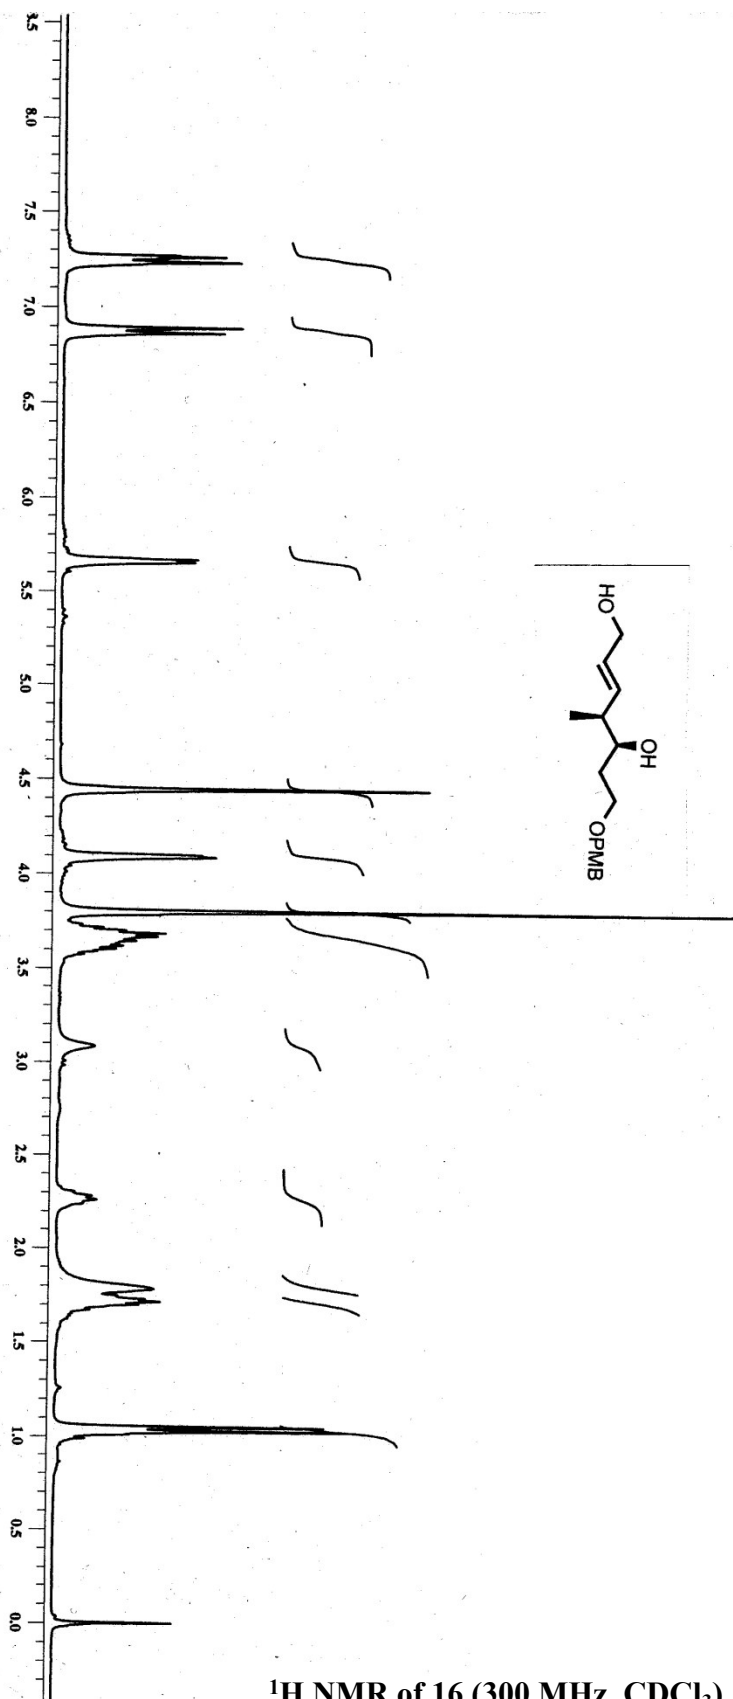



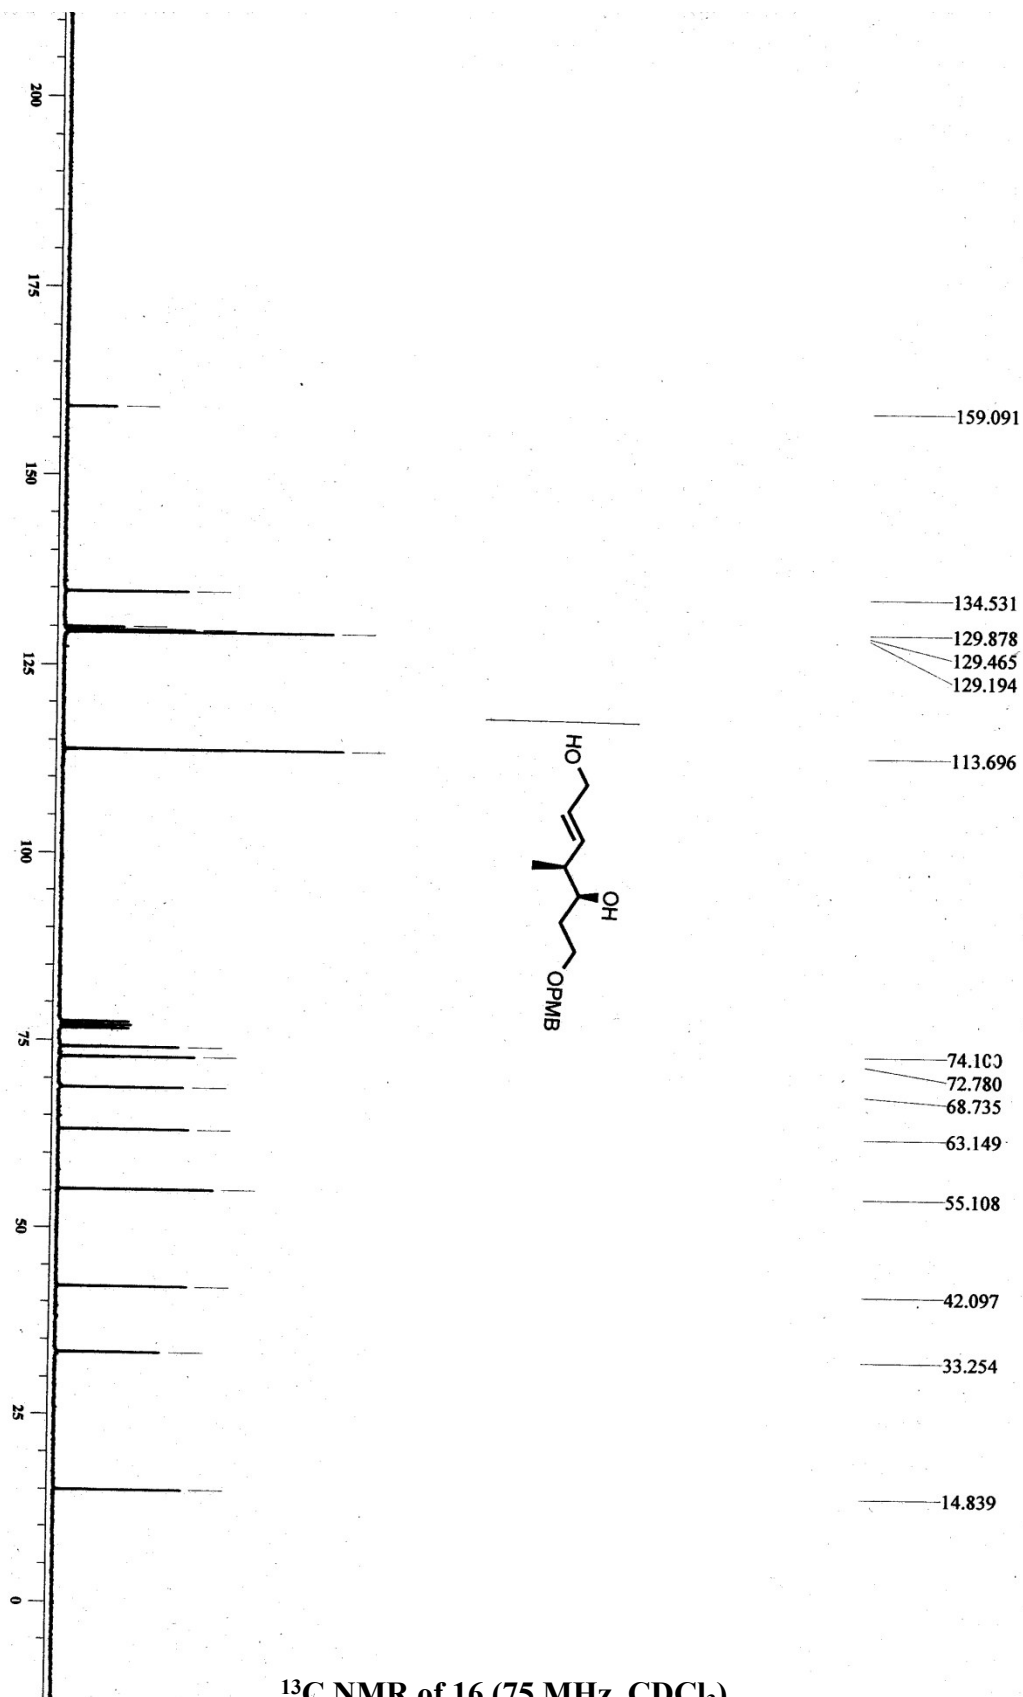

<sup>13</sup>C NMR of 16 (75 MHz, CDCl<sub>3</sub>)

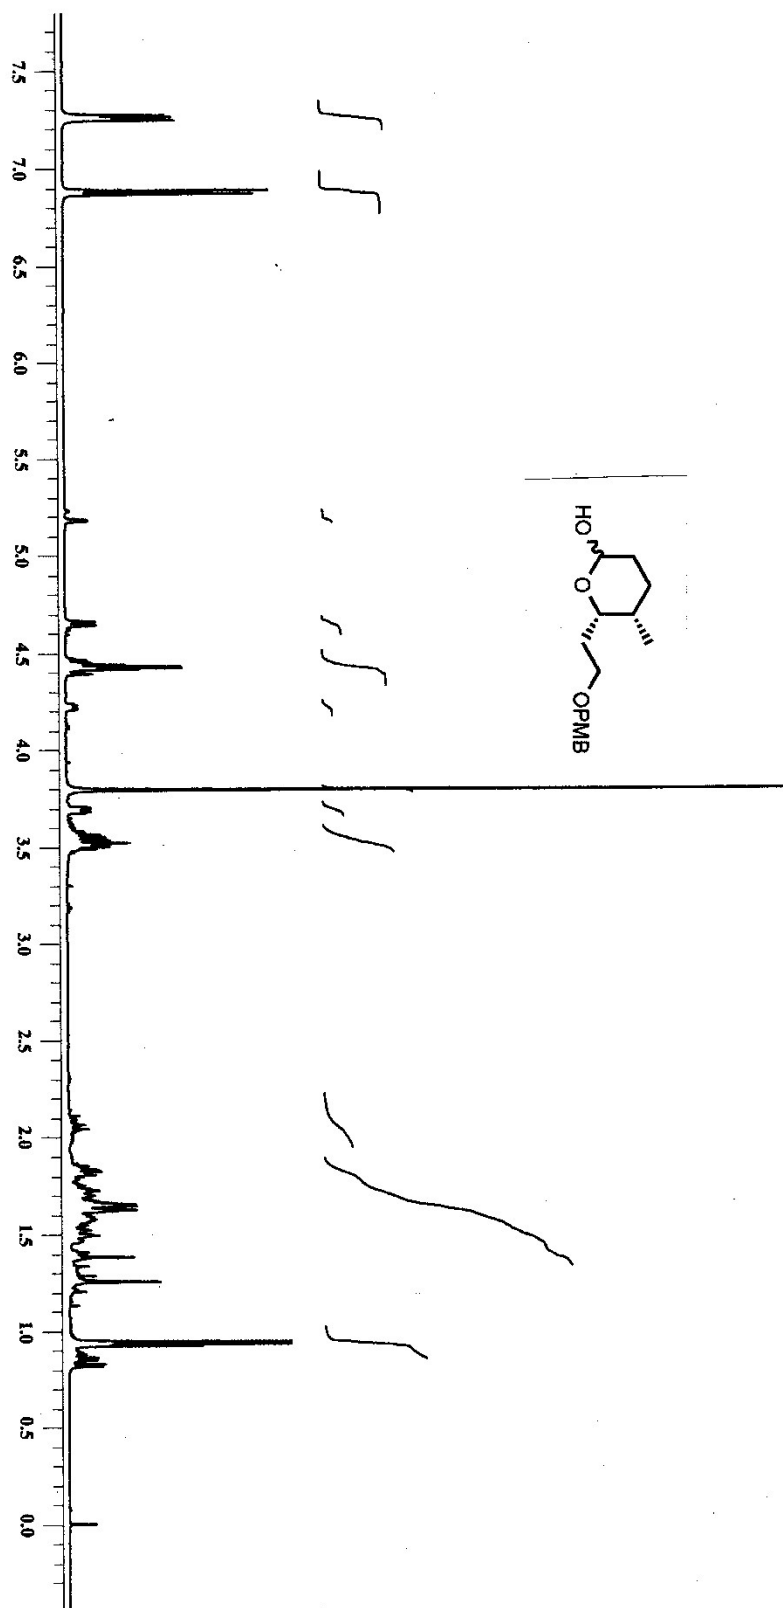

<sup>1</sup>H NMR of 1g (300 MHz, CDCl<sub>3</sub>)

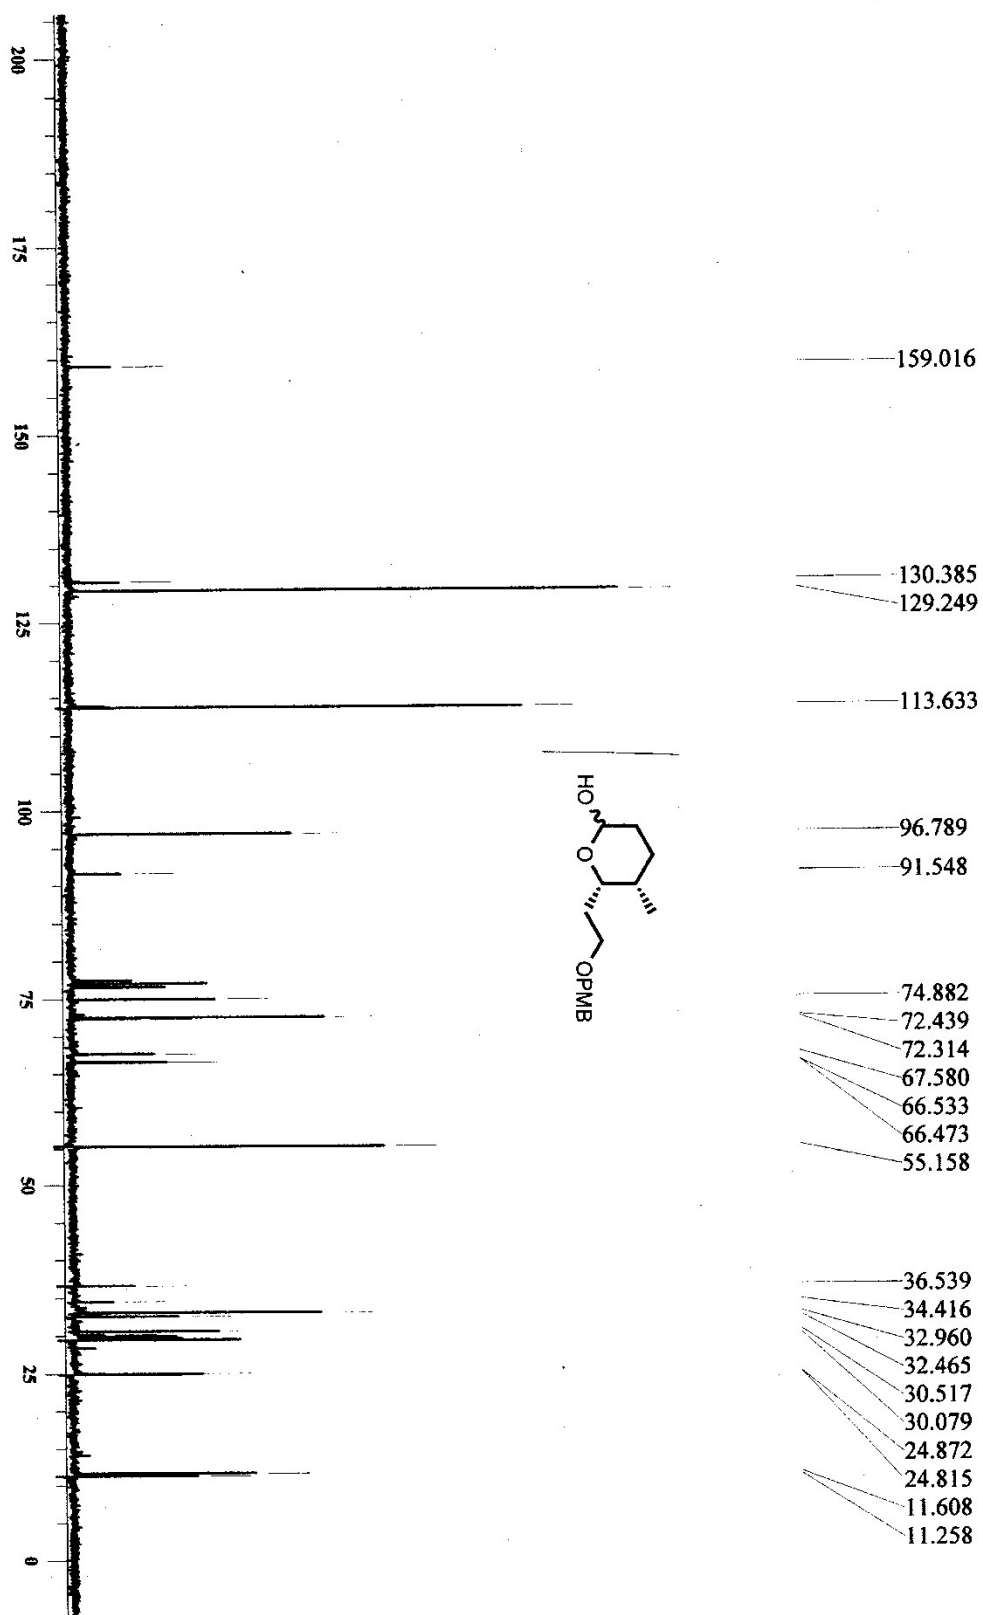

<sup>13</sup>C NMR of 1g (75 MHz, CDCl<sub>3</sub>)

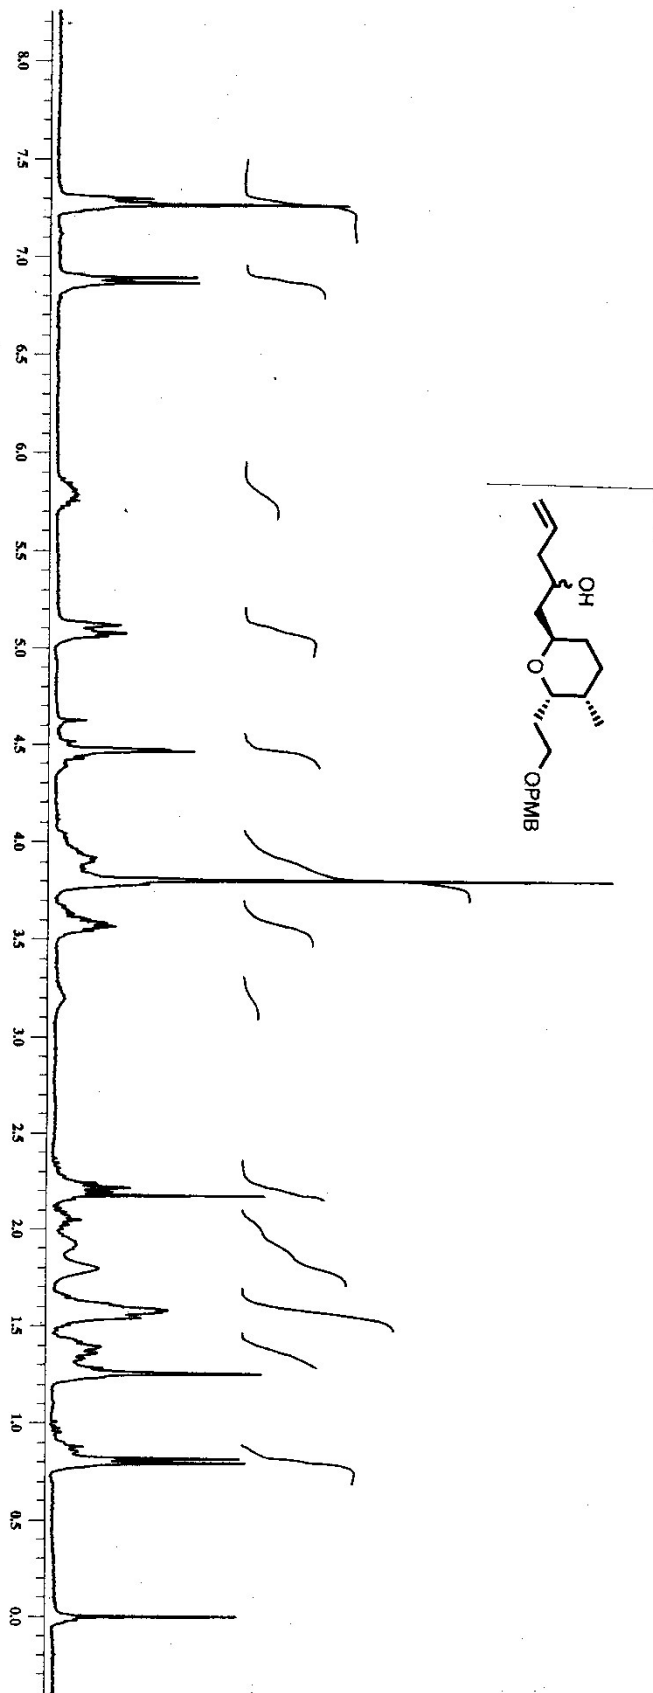

<sup>1</sup>H NMR of 18 (300 MHz, CDCl<sub>3</sub>)

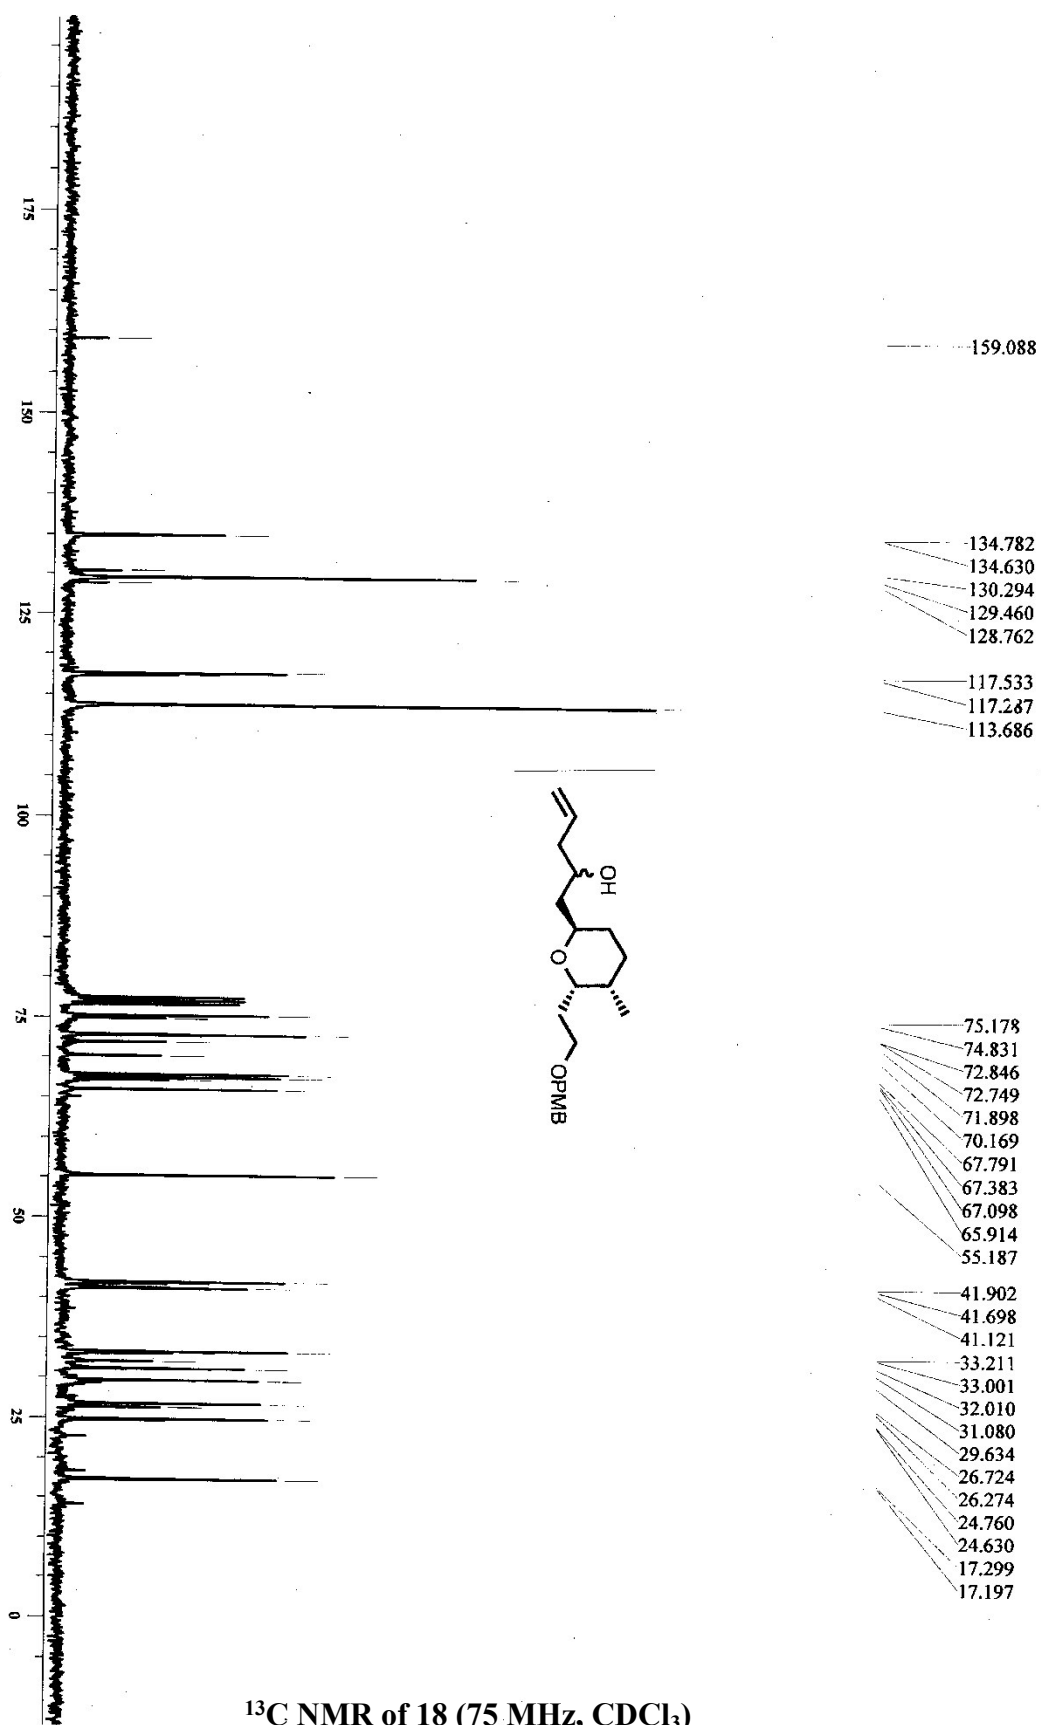

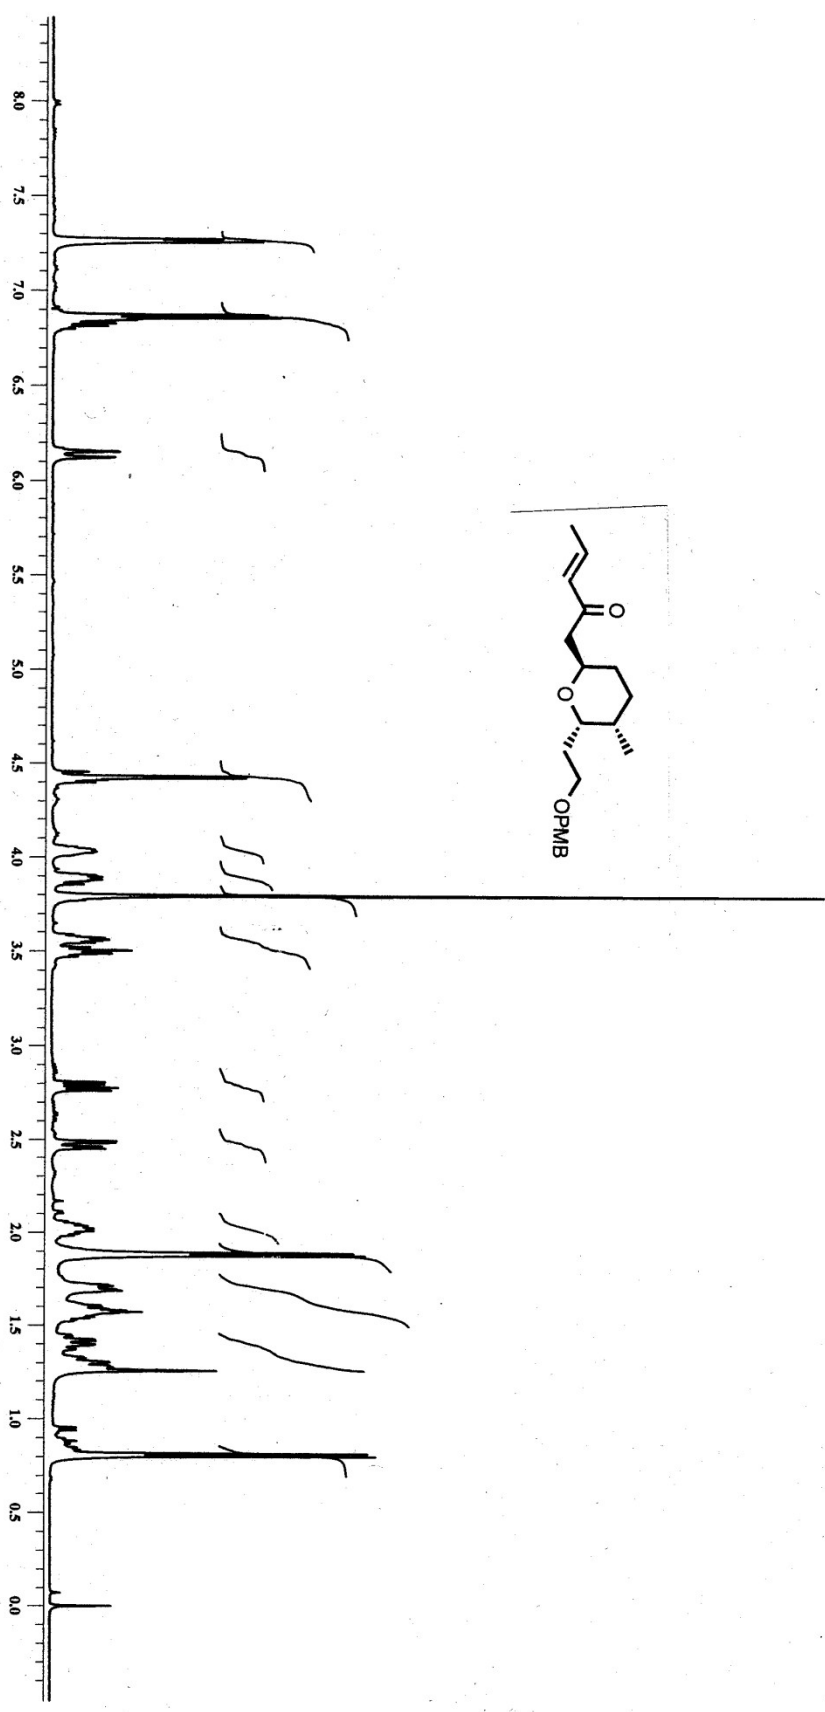

<sup>1</sup>H NMR of 19 (500 MHz, CDCl<sub>3</sub>)

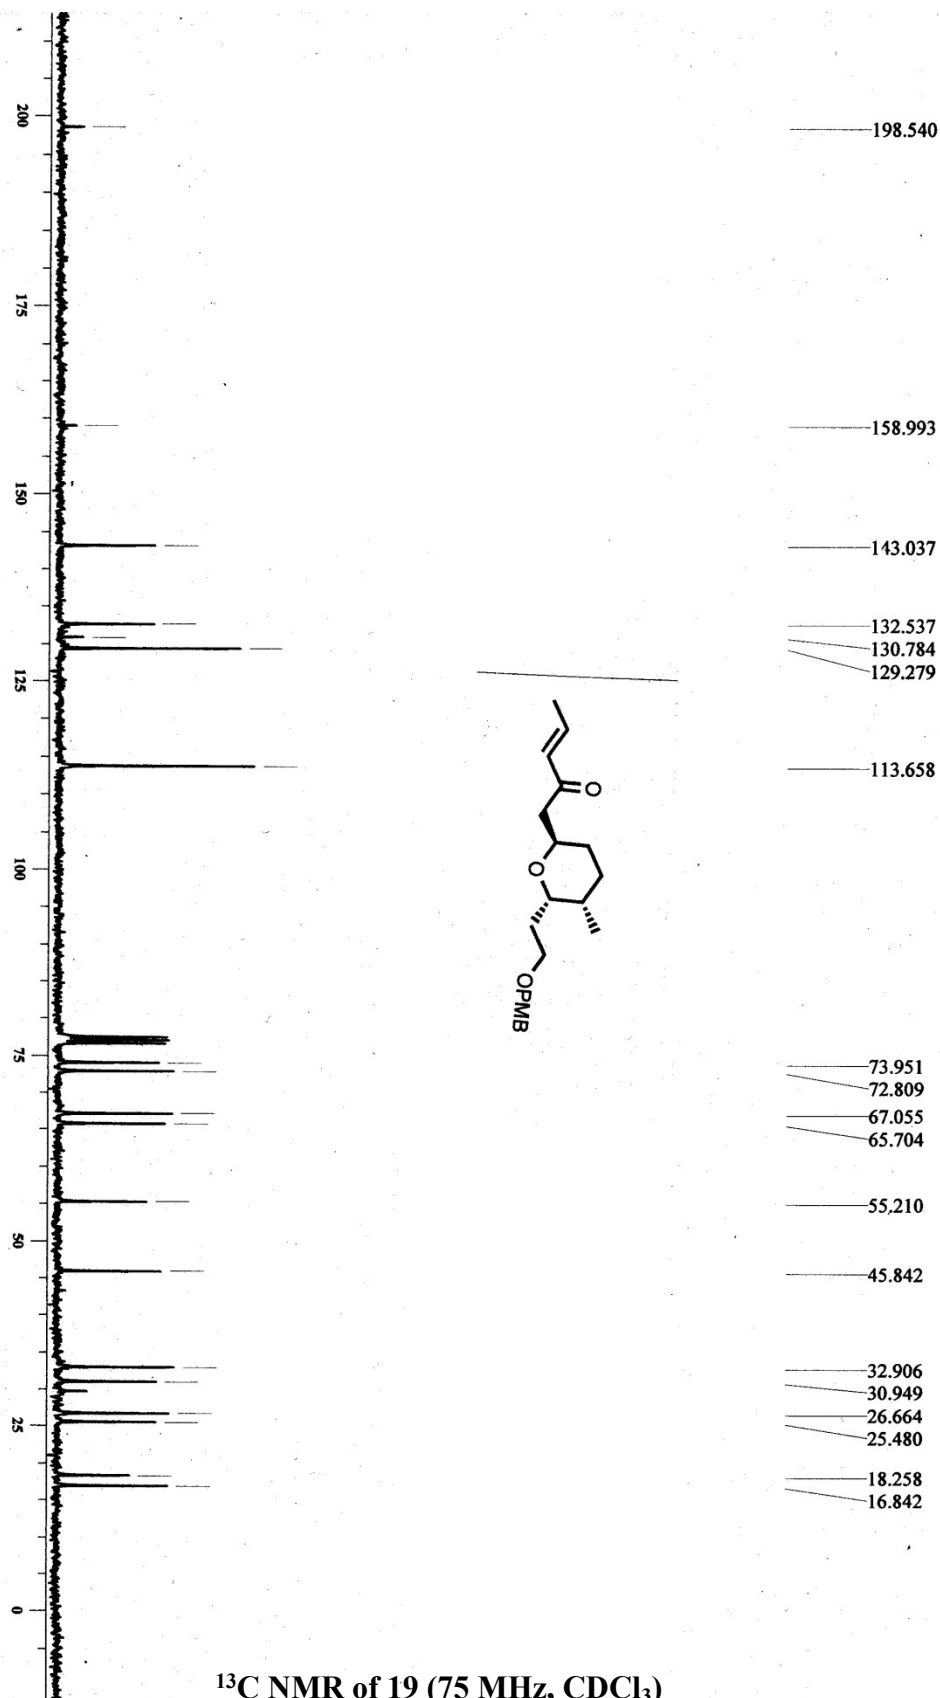

<sup>13</sup>C NMR of 19 (75 MHz, CDCl<sub>3</sub>)

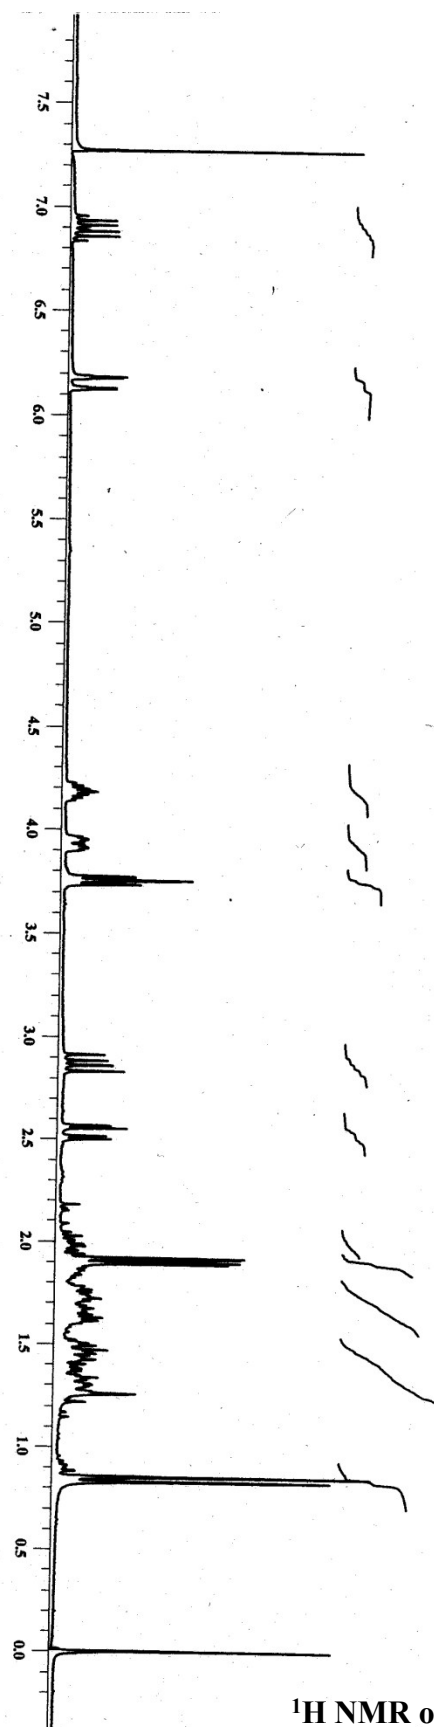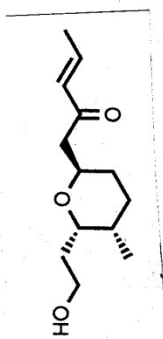

$^1\text{H}$  NMR of 20 (300 MHz,  $\text{CDCl}_3$ )



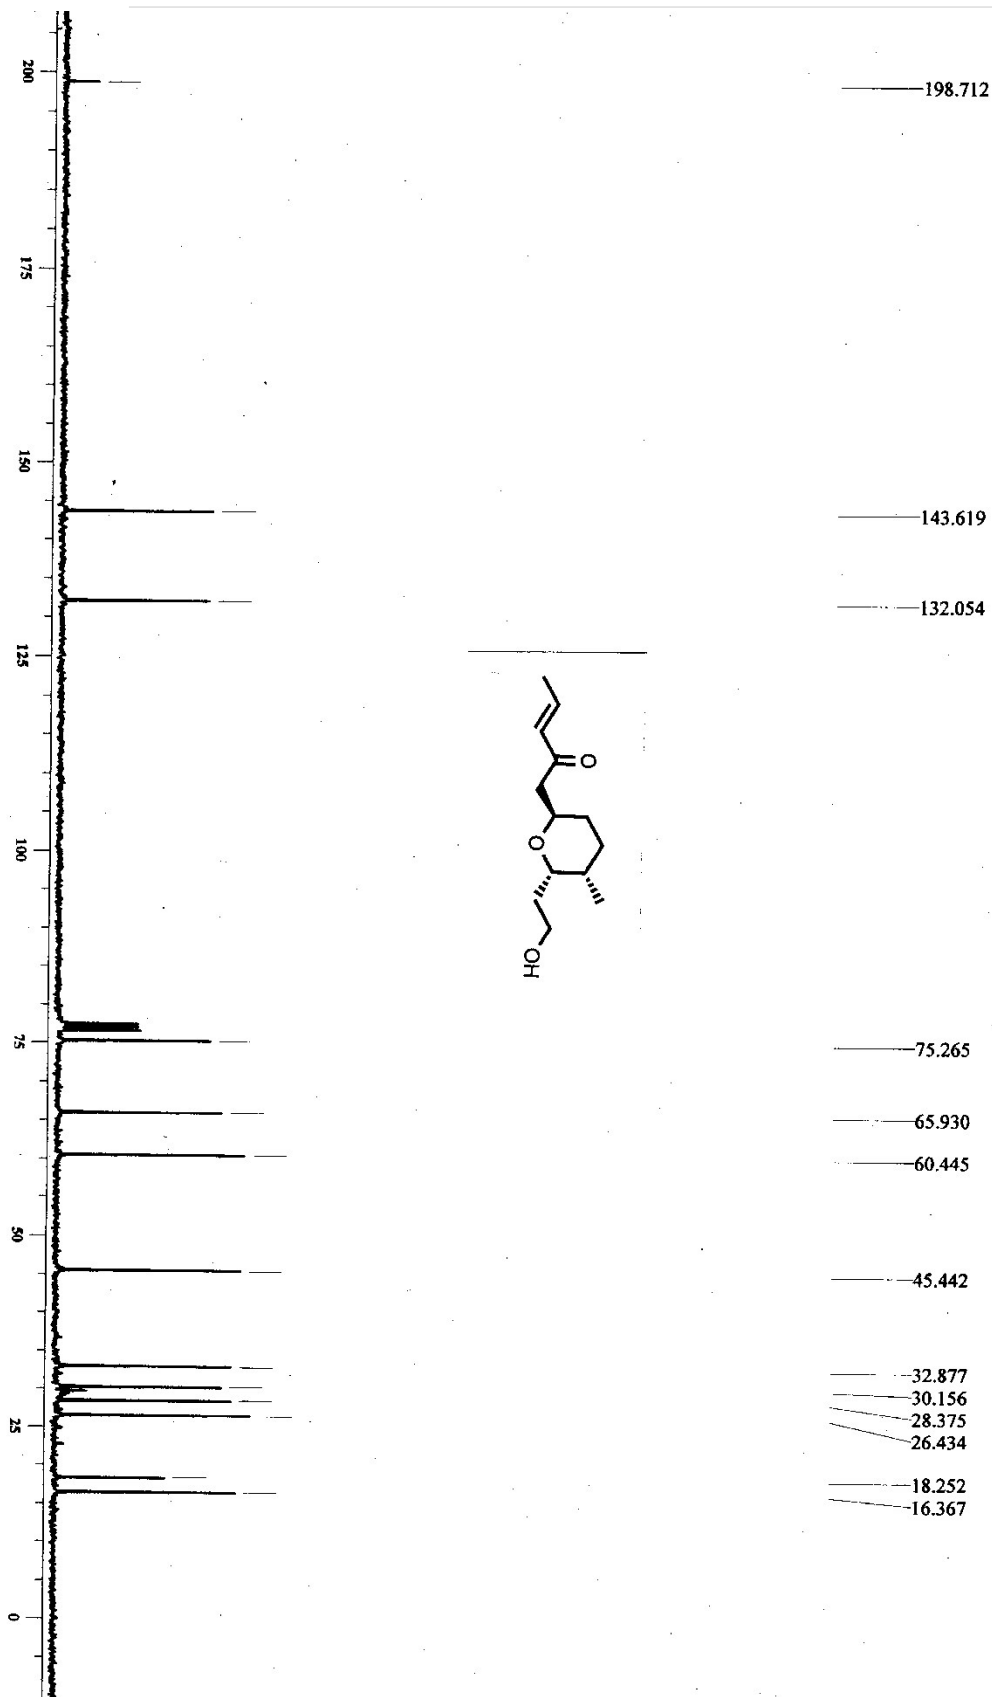 $^{13}\text{C}$  NMR of 20 (75 MHz,  $\text{CDCl}_3$ )

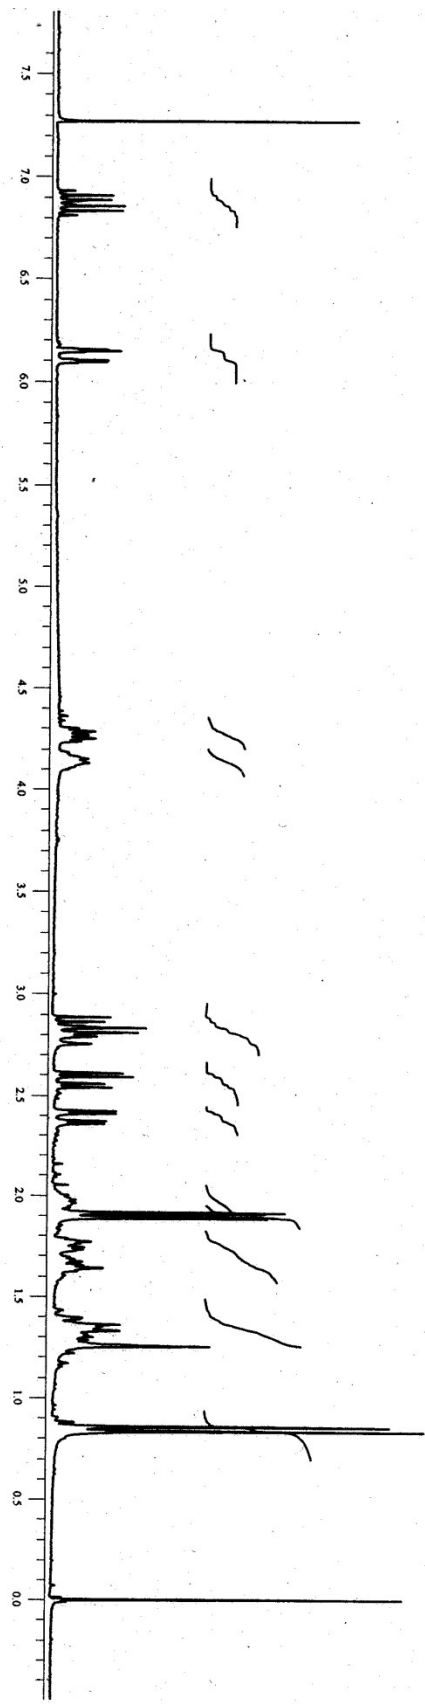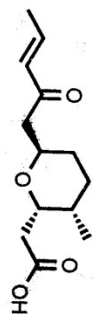

$^1\text{H}$  NMR of 21 (300 MHz,  $\text{CDCl}_3$ )

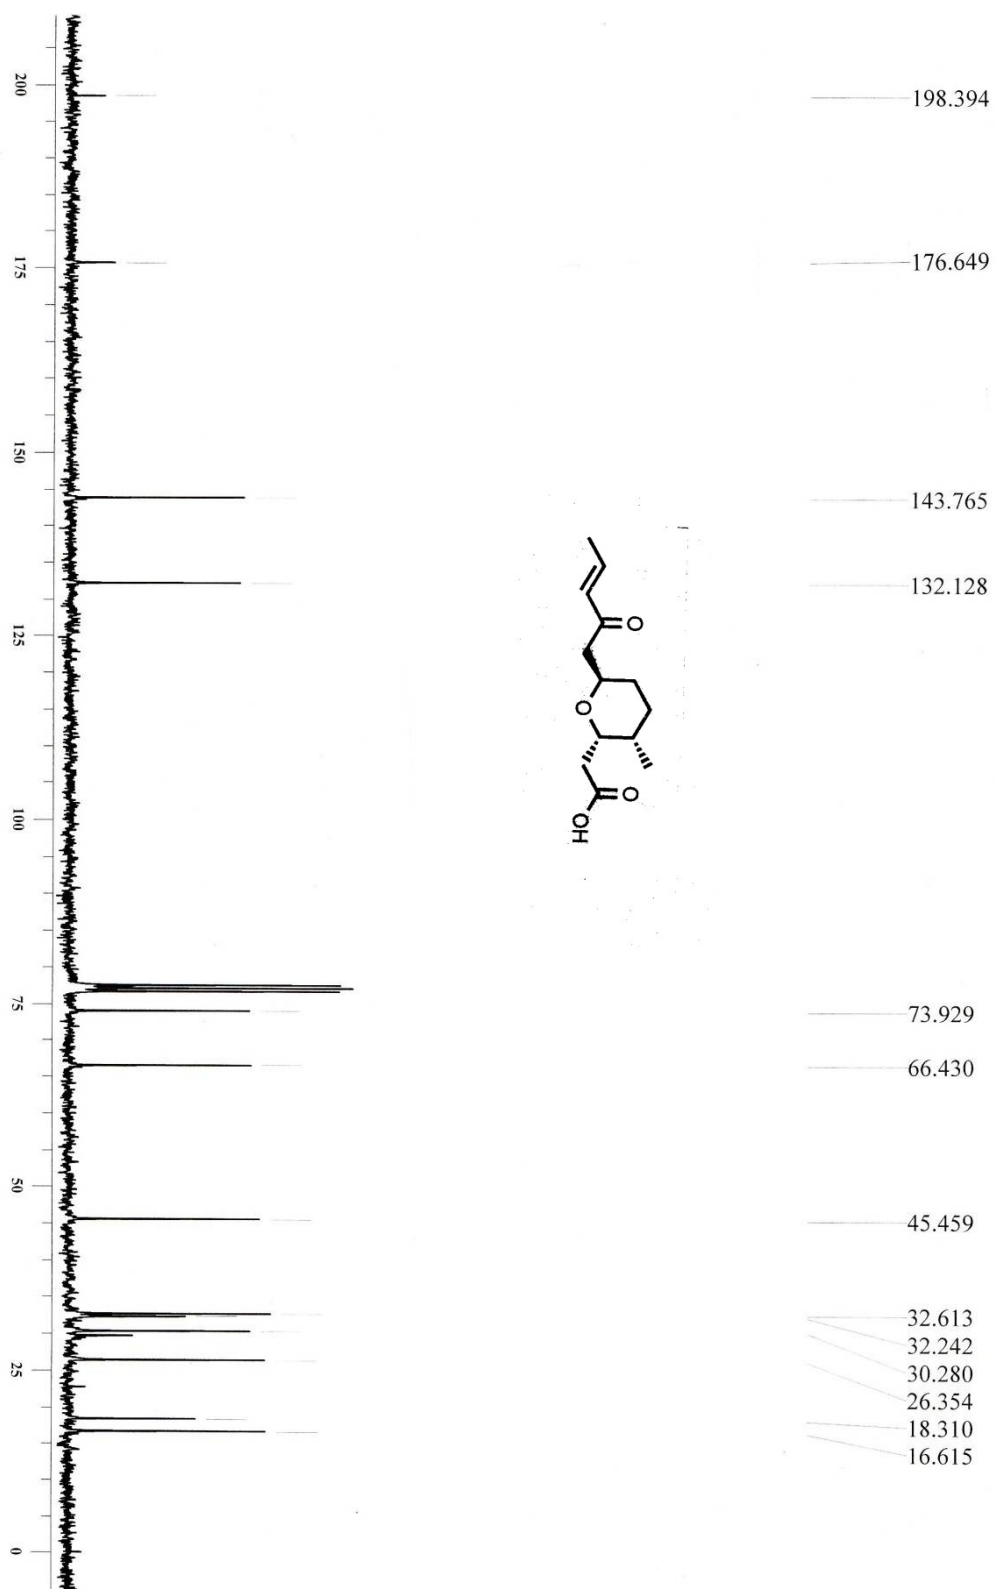

<sup>1</sup>H NMR of 21 (300 MHz, CDCl<sub>3</sub>)

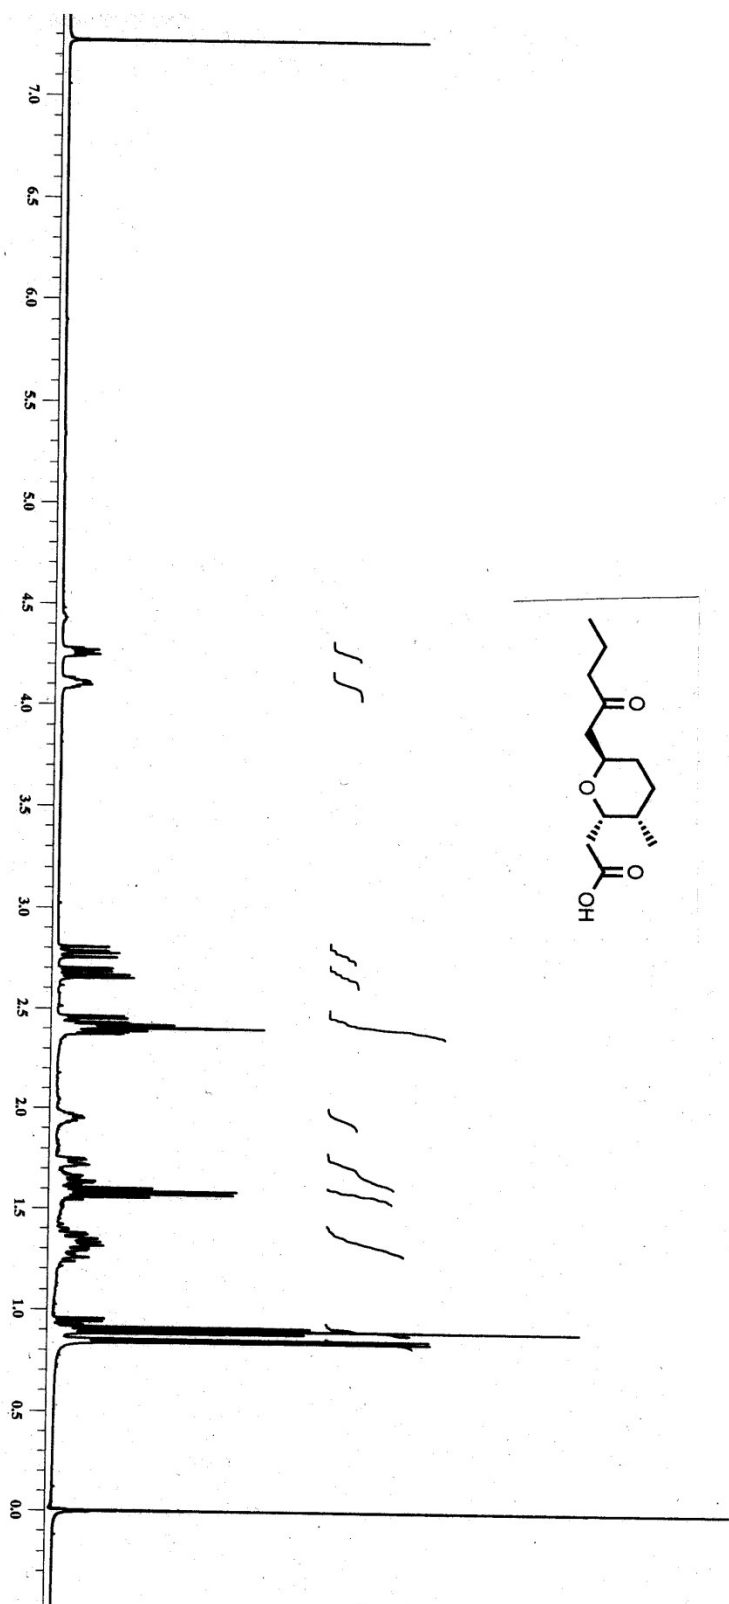

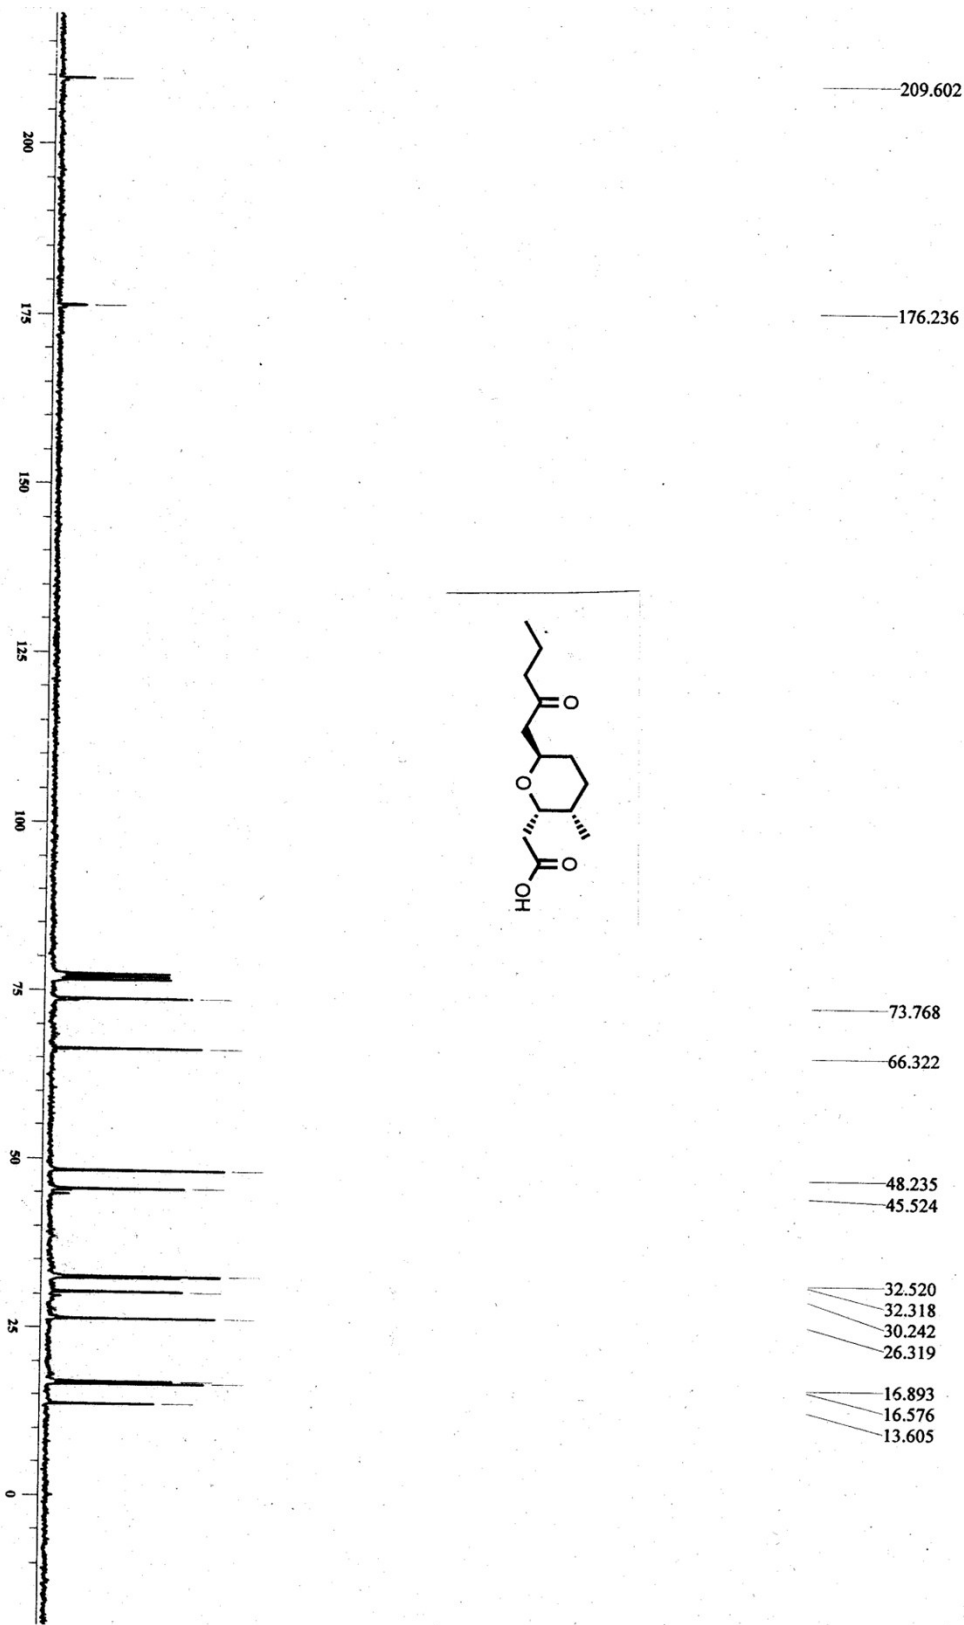

<sup>13</sup>C NMR of 22 (75 MHz, CDCl<sub>3</sub>)
